# Supplementary material for: NFAT as a Biomarker and Therapeutic Target in Non–Small Cell Lung Cancer–Related Brain Metastasis
Source: Front Oncol. 2021 Nov 30;11:781150. doi: 10.3389/fonc.2021.781150 (PMC8669620; doi:10.3389/fonc.2021.781150)
Supplement: Supplementary file 1 [file DataSheet_1.xls]

## Sheet: NSCLC-DEGs_string_interactions
#node1	node2	node1_string_id	node2_string_id	neighborhood_on_chromosome	gene_fusion	phylogenetic_cooccurrence	homology	coexpression	experimentally_determined_interaction	database_annotated	automated_textmining	combined_score
ACTG2	CNN1	9606.ENSP00000386857	9606.ENSP00000252456	0	0	0	0	0.791	0.158	0	0.517	0.907
ACTN2	TNS1	9606.ENSP00000443495	9606.ENSP00000171887	0	0	0	0	0.085	0	0.9	0.053	0.905
ACTN2	VWF	9606.ENSP00000443495	9606.ENSP00000261405	0	0	0	0	0.117	0.17	0.9	0.11	0.926
ACTN2	FIGF	9606.ENSP00000443495	9606.ENSP00000297904	0	0	0	0	0	0	0.9	0	0.9
ACTN2	CFD	9606.ENSP00000443495	9606.ENSP00000332139	0	0	0	0	0	0	0.9	0	0.9
ACTN2	LEFTY2	9606.ENSP00000443495	9606.ENSP00000355785	0	0	0	0	0	0.063	0.9	0	0.902
ACTN2	DES	9606.ENSP00000443495	9606.ENSP00000363071	0	0	0	0	0.18	0.064	0.9	0.385	0.946
ACTN2	MMRN1	9606.ENSP00000443495	9606.ENSP00000378431	0	0	0	0	0	0	0.9	0.081	0.904
ACTN2	RASGRF1	9606.ENSP00000443495	9606.ENSP00000405963	0	0	0	0	0.098	0	0.9	0.063	0.908
ACTN2	SERPINA1	9606.ENSP00000443495	9606.ENSP00000416066	0	0	0	0	0.062	0	0.9	0.064	0.904
ACTN2	GRIA1	9606.ENSP00000443495	9606.ENSP00000428994	0	0	0	0	0.096	0.05	0.9	0.085	0.91
ACTN2	TTN	9606.ENSP00000443495	9606.ENSP00000467141	0	0	0	0	0.419	0.533	0.9	0.69	0.99
ACVRL1	CAV1	9606.ENSP00000373574	9606.ENSP00000339191	0	0	0	0	0.062	0.063	0.9	0.42	0.942
ACVRL1	ENG	9606.ENSP00000373574	9606.ENSP00000362299	0	0	0	0	0.132	0.468	0.9	0.87	0.993
ADAMTS1	ADAMTS8	9606.ENSP00000284984	9606.ENSP00000257359	0	0	0	0.94	0.061	0	0.9	0.758	0.906
ADAMTS1	THSD1	9606.ENSP00000284984	9606.ENSP00000258613	0	0	0	0	0.061	0	0.9	0.041	0.902
ADAMTS1	ADAMTSL3	9606.ENSP00000284984	9606.ENSP00000286744	0	0	0	0.598	0.063	0	0.9	0.647	0.927
ADAMTS1	THBS2	9606.ENSP00000284984	9606.ENSP00000355751	0	0	0	0.542	0.145	0	0.9	0.456	0.928
ADAMTS8	THSD1	9606.ENSP00000257359	9606.ENSP00000258613	0	0	0	0	0	0	0.9	0.041	0.9
ADAMTS8	ADAMTSL3	9606.ENSP00000257359	9606.ENSP00000286744	0	0	0	0.596	0.061	0	0.9	0.093	0.904
ADAMTS8	THBS2	9606.ENSP00000257359	9606.ENSP00000355751	0	0	0	0.546	0.061	0	0.9	0.237	0.911
ADAMTSL3	THSD1	9606.ENSP00000286744	9606.ENSP00000258613	0	0	0	0	0	0	0.9	0.201	0.916
ADAMTSL3	THBS2	9606.ENSP00000286744	9606.ENSP00000355751	0	0	0	0	0.063	0	0.9	0.271	0.925
ADH1A	ADH1C	9606.ENSP00000209668	9606.ENSP00000426083	0	0	0.449	0.985	0.182	0	0.9	0.86	0.916
ADH1A	AOX1	9606.ENSP00000209668	9606.ENSP00000363832	0	0	0	0	0.097	0	0.9	0.281	0.929
ADH1C	AOX1	9606.ENSP00000426083	9606.ENSP00000363832	0	0	0	0	0.063	0	0.9	0.203	0.918
ADORA2B	RAMP3	9606.ENSP00000304501	9606.ENSP00000242249	0	0	0	0	0	0	0.9	0.074	0.903
ADORA2B	RAMP2	9606.ENSP00000304501	9606.ENSP00000253796	0	0	0	0	0.049	0	0.9	0.06	0.902
ADORA2B	SFTPD	9606.ENSP00000304501	9606.ENSP00000361366	0	0	0	0	0	0	0.9	0	0.9
ADORA2B	RXFP1	9606.ENSP00000304501	9606.ENSP00000405841	0	0	0	0.587	0.044	0	0.9	0.085	0.902
ADORA2B	GNG4	9606.ENSP00000304501	9606.ENSP00000375727	0	0	0	0	0	0.165	0.9	0	0.912
ADORA2B	CALCRL	9606.ENSP00000304501	9606.ENSP00000386972	0	0	0	0	0	0	0.9	0.166	0.913
ADORA2B	VIP	9606.ENSP00000304501	9606.ENSP00000356213	0	0	0	0	0	0	0.9	0.313	0.928
AGTR1	CFTR	9606.ENSP00000419422	9606.ENSP00000003084	0	0	0	0	0	0	0.9	0.089	0.905
AGTR1	SSTR1	9606.ENSP00000419422	9606.ENSP00000267377	0	0	0	0.77	0.076	0	0.9	0.244	0.908
AGTR1	IL7R	9606.ENSP00000419422	9606.ENSP00000306157	0	0	0	0	0	0	0.9	0	0.9
AGTR1	SH3GL3	9606.ENSP00000419422	9606.ENSP00000320092	0	0	0	0	0	0.057	0.9	0	0.901
AGTR1	EDNRB	9606.ENSP00000419422	9606.ENSP00000366416	0	0	0	0.618	0.062	0	0.9	0.518	0.92
AGTR1	EDN1	9606.ENSP00000419422	9606.ENSP00000368683	0	0	0	0	0	0.157	0.9	0.669	0.969
AGTR1	GNG4	9606.ENSP00000419422	9606.ENSP00000375727	0	0	0	0	0	0.165	0.9	0	0.912
AGTR1	GPER1	9606.ENSP00000419422	9606.ENSP00000380281	0	0	0	0.704	0	0	0.9	0.33	0.908
AKR1B10	RBP2	9606.ENSP00000352584	9606.ENSP00000232217	0	0	0	0	0.067	0.048	0.9	0.061	0.905
AKR1B10	SORD	9606.ENSP00000352584	9606.ENSP00000267814	0.085	0	0	0	0.107	0	0.9	0.534	0.956
ALAS2	SHMT2	9606.ENSP00000332369	9606.ENSP00000333667	0.076	0	0	0	0.061	0	0.9	0.175	0.918
ALDH1A2	HSD17B6	9606.ENSP00000249750	9606.ENSP00000451406	0	0	0	0	0.061	0	0.9	0.1	0.908
ALDH1A2	CYP3A7	9606.ENSP00000249750	9606.ENSP00000480571	0	0	0	0	0.063	0.085	0.9	0.148	0.917
ANGPT1	TEK	9606.ENSP00000428340	9606.ENSP00000369375	0	0	0	0	0.076	0.385	0.9	0.986	0.999
ANLN	KIF23	9606.ENSP00000265748	9606.ENSP00000260363	0	0	0	0	0.917	0.186	0	0.845	0.988
ANLN	KIF11	9606.ENSP00000265748	9606.ENSP00000260731	0	0	0	0	0.91	0.08	0	0.499	0.955
ANLN	PBK	9606.ENSP00000265748	9606.ENSP00000428489	0	0	0	0	0.865	0	0	0.325	0.905
ANLN	PRC1	9606.ENSP00000265748	9606.ENSP00000377793	0	0	0	0	0.854	0	0	0.391	0.907
ANLN	TPX2	9606.ENSP00000265748	9606.ENSP00000300403	0	0	0	0	0.839	0	0	0.455	0.908
ANLN	KIF4A	9606.ENSP00000265748	9606.ENSP00000363524	0	0	0	0	0.797	0.08	0	0.569	0.912
ANLN	CEP55	9606.ENSP00000265748	9606.ENSP00000360540	0	0	0	0	0.832	0	0	0.517	0.915
ANLN	ECT2	9606.ENSP00000265748	9606.ENSP00000376457	0	0	0	0	0.643	0	0	0.824	0.934
ANLN	BUB1	9606.ENSP00000265748	9606.ENSP00000302530	0	0	0	0	0.913	0	0	0.328	0.939
ANLN	KIF20A	9606.ENSP00000265748	9606.ENSP00000378356	0	0	0	0	0.847	0.157	0	0.599	0.943
ANLN	RACGAP1	9606.ENSP00000265748	9606.ENSP00000404190	0	0	0	0	0.843	0.19	0	0.891	0.985
AOC3	MAOB	9606.ENSP00000312326	9606.ENSP00000367309	0	0	0	0	0.089	0	0.8	0.714	0.943
AOX1	CYP3A7	9606.ENSP00000363832	9606.ENSP00000480571	0	0	0	0	0.088	0	0.9	0.057	0.906
AOX1	HSD17B6	9606.ENSP00000363832	9606.ENSP00000451406	0	0	0	0	0.062	0	0.9	0.292	0.927
AOX1	MAOB	9606.ENSP00000363832	9606.ENSP00000367309	0	0	0	0	0.062	0	0.9	0.364	0.935
ASPM	AURKA	9606.ENSP00000356379	9606.ENSP00000216911	0	0	0	0	0.898	0.272	0	0.484	0.958
ASPM	NCAPG	9606.ENSP00000356379	9606.ENSP00000251496	0	0	0	0	0.991	0	0	0.293	0.993
ASPM	CCNB1	9606.ENSP00000356379	9606.ENSP00000256442	0	0	0	0	0.95	0.063	0	0.42	0.97
ASPM	ESPL1	9606.ENSP00000356379	9606.ENSP00000257934	0	0	0	0	0.918	0	0	0.404	0.949
ASPM	KIF23	9606.ENSP00000356379	9606.ENSP00000260363	0	0	0	0	0.976	0.086	0	0.466	0.987
ASPM	KIF11	9606.ENSP00000356379	9606.ENSP00000260731	0	0	0	0	0.988	0.086	0	0.644	0.995
ASPM	NDC80	9606.ENSP00000356379	9606.ENSP00000261597	0	0	0	0	0.98	0	0	0.066	0.98
ASPM	KIF18A	9606.ENSP00000356379	9606.ENSP00000263181	0	0	0	0	0.847	0.086	0	0.35	0.901
ASPM	CENPE	9606.ENSP00000356379	9606.ENSP00000265148	0	0	0	0	0.985	0.086	0	0.472	0.992
ASPM	NUF2	9606.ENSP00000356379	9606.ENSP00000271452	0	0	0	0	0.897	0	0	0.257	0.92
ASPM	CCNA2	9606.ENSP00000356379	9606.ENSP00000274026	0	0	0	0	0.976	0.063	0	0.228	0.981
ASPM	BUB1B	9606.ENSP00000356379	9606.ENSP00000287598	0	0	0	0	0.923	0.353	0	0.408	0.968
ASPM	CCNB2	9606.ENSP00000356379	9606.ENSP00000288207	0	0	0	0	0.909	0.063	0	0.423	0.946
ASPM	MELK	9606.ENSP00000356379	9606.ENSP00000298048	0	0	0	0	0.923	0.064	0	0.346	0.949
ASPM	KIAA0101	9606.ENSP00000356379	9606.ENSP00000300035	0	0	0	0	0.903	0	0	0.068	0.906
ASPM	TPX2	9606.ENSP00000356379	9606.ENSP00000300403	0	0	0	0	0.966	0	0	0.096	0.968
ASPM	BIRC5	9606.ENSP00000356379	9606.ENSP00000301633	0	0	0	0	0.892	0	0	0.253	0.916
ASPM	BUB1	9606.ENSP00000356379	9606.ENSP00000302530	0	0	0	0	0.984	0.353	0	0.446	0.993
ASPM	CKAP2L	9606.ENSP00000356379	9606.ENSP00000305204	0	0	0	0	0.869	0	0	0.432	0.922
ASPM	AURKB	9606.ENSP00000356379	9606.ENSP00000313950	0	0	0	0	0.955	0.08	0	0.419	0.974
ASPM	SPAG5	9606.ENSP00000356379	9606.ENSP00000323300	0	0	0	0	0.916	0	0	0.231	0.932
ASPM	KIF15	9606.ENSP00000356379	9606.ENSP00000324020	0	0	0	0	0.934	0.103	0	0.578	0.973
ASPM	NCAPD2	9606.ENSP00000356379	9606.ENSP00000325017	0	0	0	0	0.909	0	0	0.457	0.948
ASPM	KNTC1	9606.ENSP00000356379	9606.ENSP00000328236	0	0	0	0	0.874	0.261	0	0.238	0.923
ASPM	CDKN3	9606.ENSP00000356379	9606.ENSP00000335357	0	0	0	0	0.897	0.094	0	0.369	0.936
ASPM	UBE2C	9606.ENSP00000356379	9606.ENSP00000348838	0	0	0	0	0.898	0.081	0	0.296	0.928
ASPM	RRM2	9606.ENSP00000356379	9606.ENSP00000353770	0	0	0	0	0.913	0.064	0	0.077	0.918
ASPM	EXO1	9606.ENSP00000356379	9606.ENSP00000355506	0	0	0	0	0.918	0.104	0	0.089	0.927
ASPM	CENPF	9606.ENSP00000356379	9606.ENSP00000355922	0	0	0	0	0.962	0	0	0.495	0.98
ASPM	DTL	9606.ENSP00000356379	9606.ENSP00000355958	0	0	0	0	0.92	0	0	0	0.92
ASPM	NEK2	9606.ENSP00000356379	9606.ENSP00000355966	0	0	0	0	0.91	0.064	0	0.149	0.922
ASPM	KIF14	9606.ENSP00000356379	9606.ENSP00000356319	0	0	0	0	0.915	0.086	0	0.258	0.937
ASPM	CKS2	9606.ENSP00000356379	9606.ENSP00000364976	0	0	0	0	0.917	0	0	0.066	0.919
ASPM	MKI67	9606.ENSP00000356379	9606.ENSP00000357643	0	0	0	0	0.927	0	0	0.225	0.941
ASPM	KIF2C	9606.ENSP00000356379	9606.ENSP00000361298	0	0	0	0	0.915	0.086	0	0.321	0.942
ASPM	PBK	9606.ENSP00000356379	9606.ENSP00000428489	0	0	0	0	0.925	0.064	0	0.312	0.947
ASPM	CDCA3	9606.ENSP00000356379	9606.ENSP00000442068	0	0	0	0	0.93	0	0	0.292	0.948
ASPM	HMMR	9606.ENSP00000356379	9606.ENSP00000377492	0	0	0	0	0.931	0	0	0.297	0.95
ASPM	KIF20A	9606.ENSP00000356379	9606.ENSP00000378356	0	0	0	0	0.914	0.086	0	0.43	0.951
ASPM	CEP55	9606.ENSP00000356379	9606.ENSP00000360540	0	0	0	0	0.932	0	0	0.325	0.952
ASPM	CKAP2	9606.ENSP00000356379	9606.ENSP00000367276	0	0	0	0	0.947	0	0	0.227	0.957
ASPM	ECT2	9606.ENSP00000356379	9606.ENSP00000376457	0	0	0	0	0.942	0.084	0	0.287	0.958
ASPM	CDCA8	9606.ENSP00000356379	9606.ENSP00000362146	0	0	0	0	0.966	0	0	0.12	0.969
ASPM	KIF4A	9606.ENSP00000356379	9606.ENSP00000363524	0	0	0	0	0.945	0.086	0	0.458	0.97
ASPM	PRC1	9606.ENSP00000356379	9606.ENSP00000377793	0	0	0	0	0.965	0.071	0	0.323	0.976
ASPM	NUSAP1	9606.ENSP00000356379	9606.ENSP00000453403	0	0	0	0	0.975	0	0	0.22	0.98
ATAD2	TFAP2A	9606.ENSP00000287394	9606.ENSP00000368924	0	0	0	0	0.073	0	0.9	0	0.903
ATAD5	WDHD1	9606.ENSP00000313171	9606.ENSP00000353793	0	0	0	0	0.528	0.266	0	0.778	0.916
ATAD5	RFC4	9606.ENSP00000313171	9606.ENSP00000376272	0	0	0	0	0.336	0.951	0	0.765	0.991
ATP1A2	ATP1B2	9606.ENSP00000354490	9606.ENSP00000250111	0	0	0	0	0.352	0.348	0.9	0.625	0.982
AURKA	TYMS	9606.ENSP00000216911	9606.ENSP00000315644	0	0	0	0	0.86	0	0	0.339	0.904
AURKA	RRM2	9606.ENSP00000216911	9606.ENSP00000353770	0	0	0	0	0.825	0	0	0.476	0.904
AURKA	CDCA3	9606.ENSP00000216911	9606.ENSP00000442068	0	0	0	0	0.87	0	0	0.316	0.907
AURKA	RFC4	9606.ENSP00000216911	9606.ENSP00000376272	0	0	0	0	0.874	0	0	0.329	0.911
AURKA	CEP72	9606.ENSP00000216911	9606.ENSP00000264935	0	0	0	0	0.095	0	0.9	0.112	0.912
AURKA	CENPF	9606.ENSP00000216911	9606.ENSP00000355922	0	0	0	0	0.846	0	0	0.46	0.913
AURKA	CEP55	9606.ENSP00000216911	9606.ENSP00000360540	0	0	0	0	0.848	0.102	0	0.426	0.914
AURKA	PBK	9606.ENSP00000216911	9606.ENSP00000428489	0	0	0	0	0.877	0.065	0	0.337	0.917
AURKA	SGOL1	9606.ENSP00000216911	9606.ENSP00000263753	0	0	0	0	0.882	0	0	0.348	0.919
AURKA	MELK	9606.ENSP00000216911	9606.ENSP00000298048	0	0	0	0.738	0.917	0	0	0.54	0.928
AURKA	ECT2	9606.ENSP00000216911	9606.ENSP00000376457	0	0	0	0	0.872	0.09	0	0.451	0.93
AURKA	RACGAP1	9606.ENSP00000216911	9606.ENSP00000404190	0	0	0	0	0.874	0	0	0.523	0.937
AURKA	CDKN3	9606.ENSP00000216911	9606.ENSP00000335357	0	0	0	0	0.901	0.194	0	0.36	0.945
AURKA	SPAG5	9606.ENSP00000216911	9606.ENSP00000323300	0	0	0	0	0.818	0.379	0	0.576	0.947
AURKA	NCAPG	9606.ENSP00000216911	9606.ENSP00000251496	0	0	0	0	0.898	0.263	0	0.372	0.949
AURKA	PRC1	9606.ENSP00000216911	9606.ENSP00000377793	0	0	0	0	0.927	0.055	0	0.402	0.955
AURKA	FOXM1	9606.ENSP00000216911	9606.ENSP00000342307	0	0	0	0	0.818	0	0	0.764	0.955
AURKA	KIF4A	9606.ENSP00000216911	9606.ENSP00000363524	0	0	0	0	0.921	0.125	0	0.498	0.962
AURKA	NUSAP1	9606.ENSP00000216911	9606.ENSP00000453403	0	0	0	0	0.94	0	0	0.403	0.963
AURKA	CENPE	9606.ENSP00000216911	9606.ENSP00000265148	0	0	0	0	0.887	0.189	0	0.64	0.964
AURKA	BUB1B	9606.ENSP00000216911	9606.ENSP00000287598	0	0	0	0	0.844	0.246	0	0.747	0.967
AURKA	KIF20A	9606.ENSP00000216911	9606.ENSP00000378356	0	0	0	0	0.94	0.125	0	0.546	0.974
AURKA	KIF23	9606.ENSP00000216911	9606.ENSP00000260363	0	0	0	0	0.919	0.125	0	0.665	0.974
AURKA	BRCA1	9606.ENSP00000216911	9606.ENSP00000418960	0	0	0	0	0.327	0.379	0.9	0.571	0.979
AURKA	KIF2C	9606.ENSP00000216911	9606.ENSP00000361298	0	0	0	0	0.868	0.433	0	0.76	0.98
AURKA	CDCA8	9606.ENSP00000216911	9606.ENSP00000362146	0	0	0	0	0.933	0	0.54	0.586	0.986
AURKA	CCNA2	9606.ENSP00000216911	9606.ENSP00000274026	0	0	0	0	0.964	0.177	0	0.582	0.986
AURKA	NDC80	9606.ENSP00000216911	9606.ENSP00000261597	0	0	0	0	0.909	0.484	0	0.774	0.988
AURKA	PLK4	9606.ENSP00000216911	9606.ENSP00000270861	0	0	0	0.81	0.812	0.342	0.9	0.66	0.988
AURKA	NEK2	9606.ENSP00000216911	9606.ENSP00000355966	0	0	0.361	0.69	0.877	0	0.9	0.679	0.99
AURKA	CCNB1	9606.ENSP00000216911	9606.ENSP00000256442	0	0	0	0	0.925	0.291	0	0.858	0.991
AURKA	KIF15	9606.ENSP00000216911	9606.ENSP00000324020	0	0	0	0	0.754	0.125	0.9	0.72	0.993
AURKA	AURKB	9606.ENSP00000216911	9606.ENSP00000313950	0	0	0.445	0.959	0.925	0.094	0.9	0.878	0.993
AURKA	BUB1	9606.ENSP00000216911	9606.ENSP00000302530	0	0	0	0	0.962	0.246	0	0.783	0.993
AURKA	HMMR	9606.ENSP00000216911	9606.ENSP00000377492	0	0	0	0	0.827	0.342	0.9	0.552	0.994
AURKA	KIF11	9606.ENSP00000216911	9606.ENSP00000260731	0	0	0	0	0.94	0.482	0	0.831	0.994
AURKA	UBE2C	9606.ENSP00000216911	9606.ENSP00000348838	0	0	0	0	0.949	0.064	0.9	0.639	0.998
AURKA	CENPA	9606.ENSP00000216911	9606.ENSP00000336868	0	0	0	0	0.827	0.294	0.9	0.912	0.998
AURKA	BIRC5	9606.ENSP00000216911	9606.ENSP00000301633	0	0	0	0	0.869	0.56	0.9	0.711	0.998
AURKA	CCNB2	9606.ENSP00000216911	9606.ENSP00000288207	0	0	0	0	0.973	0.896	0	0.696	0.999
AURKA	TPX2	9606.ENSP00000216911	9606.ENSP00000300403	0	0	0	0	0.952	0.982	0.9	0.886	0.999
AURKB	CDC6	9606.ENSP00000313950	9606.ENSP00000209728	0	0	0	0	0.767	0.188	0	0.588	0.915
AURKB	NUP155	9606.ENSP00000313950	9606.ENSP00000231498	0	0	0	0	0.188	0	0.9	0.1	0.92
AURKB	NCAPG	9606.ENSP00000313950	9606.ENSP00000251496	0	0	0	0	0.959	0.263	0.9	0.379	0.997
AURKB	CCNB1	9606.ENSP00000313950	9606.ENSP00000256442	0	0	0	0	0.933	0.291	0.9	0.797	0.998
AURKB	TROAP	9606.ENSP00000313950	9606.ENSP00000257909	0	0	0	0	0.915	0	0	0.145	0.925
AURKB	ESPL1	9606.ENSP00000313950	9606.ENSP00000257934	0	0	0	0	0.903	0	0.9	0.802	0.997
AURKB	KIF23	9606.ENSP00000313950	9606.ENSP00000260363	0	0	0	0	0.887	0.125	0.9	0.906	0.998
AURKB	KIF11	9606.ENSP00000313950	9606.ENSP00000260731	0	0	0	0	0.961	0.261	0	0.801	0.993
AURKB	NDC80	9606.ENSP00000313950	9606.ENSP00000261597	0	0	0	0	0.961	0.484	0.9	0.962	0.999
AURKB	KIF18A	9606.ENSP00000313950	9606.ENSP00000263181	0	0	0	0	0.44	0.186	0.9	0.493	0.973
AURKB	SGOL1	9606.ENSP00000313950	9606.ENSP00000263753	0	0	0	0	0.851	0.379	0.9	0.705	0.996
AURKB	CENPE	9606.ENSP00000313950	9606.ENSP00000265148	0	0	0	0	0.935	0.189	0.9	0.783	0.998
AURKB	NUF2	9606.ENSP00000313950	9606.ENSP00000271452	0	0	0	0	0.838	0.328	0.9	0.74	0.996
AURKB	CCNA2	9606.ENSP00000313950	9606.ENSP00000274026	0	0	0	0	0.969	0.177	0	0.661	0.99
AURKB	CENPU	9606.ENSP00000313950	9606.ENSP00000281453	0	0	0	0	0.55	0	0.9	0.405	0.97
AURKB	SPC25	9606.ENSP00000313950	9606.ENSP00000282074	0	0	0	0	0.675	0	0.9	0.441	0.98
AURKB	CENPH	9606.ENSP00000313950	9606.ENSP00000283006	0	0	0	0	0.354	0	0.9	0.487	0.964
AURKB	BUB1B	9606.ENSP00000313950	9606.ENSP00000287598	0	0	0	0	0.918	0.444	0.9	0.912	0.999
AURKB	CCNB2	9606.ENSP00000313950	9606.ENSP00000288207	0	0	0	0	0.962	0.291	0.9	0.677	0.999
AURKB	KIAA0101	9606.ENSP00000313950	9606.ENSP00000300035	0	0	0	0	0.925	0	0	0.111	0.93
AURKB	TPX2	9606.ENSP00000313950	9606.ENSP00000300403	0	0	0	0	0.897	0.435	0	0.779	0.986
AURKB	BIRC5	9606.ENSP00000313950	9606.ENSP00000301633	0	0	0	0	0.874	0.588	0.9	0.701	0.998
AURKB	BUB1	9606.ENSP00000313950	9606.ENSP00000302530	0	0	0	0	0.921	0.246	0.9	0.861	0.999
AURKB	CKS1B	9606.ENSP00000313950	9606.ENSP00000311083	0	0	0	0	0.924	0	0	0.432	0.955
AURKB	UHRF1	9606.ENSP00000313950	9606.ENSP00000479617	0	0	0	0	0.881	0	0	0.215	0.902
AURKB	PBK	9606.ENSP00000313950	9606.ENSP00000428489	0	0	0	0	0.859	0.065	0	0.33	0.904
AURKB	CEP55	9606.ENSP00000313950	9606.ENSP00000360540	0	0	0	0	0.818	0	0	0.508	0.907
AURKB	ECT2	9606.ENSP00000313950	9606.ENSP00000376457	0	0	0	0	0.791	0.09	0	0.555	0.908
AURKB	CDCA3	9606.ENSP00000313950	9606.ENSP00000442068	0	0	0	0	0.888	0	0	0.356	0.925
AURKB	NEK2	9606.ENSP00000313950	9606.ENSP00000355966	0	0	0.388	0.695	0.895	0	0	0.676	0.926
AURKB	TYMS	9606.ENSP00000313950	9606.ENSP00000315644	0	0	0	0	0.914	0	0	0.23	0.931
AURKB	CENPL	9606.ENSP00000313950	9606.ENSP00000348527	0	0	0	0	0.187	0	0.9	0.267	0.935
AURKB	GSG2	9606.ENSP00000313950	9606.ENSP00000325290	0	0	0	0	0.344	0.379	0	0.862	0.939
AURKB	FOXM1	9606.ENSP00000313950	9606.ENSP00000342307	0	0	0	0	0.841	0	0	0.658	0.943
AURKB	PRC1	9606.ENSP00000313950	9606.ENSP00000377793	0	0	0	0	0.904	0.055	0	0.436	0.944
AURKB	RRM2	9606.ENSP00000313950	9606.ENSP00000353770	0	0	0	0	0.921	0	0	0.337	0.945
AURKB	SPAG5	9606.ENSP00000313950	9606.ENSP00000323300	0	0	0	0	0.909	0	0	0.425	0.945
AURKB	DES	9606.ENSP00000313950	9606.ENSP00000363071	0	0	0	0	0.08	0.379	0.9	0.171	0.946
AURKB	CENPO	9606.ENSP00000313950	9606.ENSP00000370214	0	0	0	0	0.243	0	0.9	0.356	0.947
AURKB	KIF15	9606.ENSP00000313950	9606.ENSP00000324020	0	0	0	0	0.882	0.125	0	0.536	0.948
AURKB	NUSAP1	9606.ENSP00000313950	9606.ENSP00000453403	0	0	0	0	0.933	0	0	0.455	0.962
AURKB	ERCC6L	9606.ENSP00000313950	9606.ENSP00000334675	0	0	0	0	0.58	0	0.9	0.355	0.97
AURKB	CENPI	9606.ENSP00000313950	9606.ENSP00000362018	0	0	0	0	0.499	0	0.9	0.498	0.972
AURKB	KNTC1	9606.ENSP00000313950	9606.ENSP00000328236	0	0	0	0	0.649	0	0.9	0.298	0.973
AURKB	KIF4A	9606.ENSP00000313950	9606.ENSP00000363524	0	0	0	0	0.889	0.125	0	0.823	0.981
AURKB	CENPN	9606.ENSP00000313950	9606.ENSP00000377007	0	0	0	0	0.806	0	0.9	0.297	0.985
AURKB	SGOL2	9606.ENSP00000313950	9606.ENSP00000350447	0	0	0	0	0.666	0	0.9	0.757	0.991
AURKB	CENPF	9606.ENSP00000313950	9606.ENSP00000355922	0	0	0	0	0.803	0	0.9	0.606	0.991
AURKB	NCAPD2	9606.ENSP00000313950	9606.ENSP00000325017	0	0	0	0	0.79	0.279	0.9	0.492	0.991
AURKB	SPC24	9606.ENSP00000313950	9606.ENSP00000465075	0	0	0	0	0.849	0	0.9	0.543	0.992
AURKB	ZWINT	9606.ENSP00000313950	9606.ENSP00000363055	0	0	0	0	0.7	0	0.9	0.794	0.993
AURKB	RACGAP1	9606.ENSP00000313950	9606.ENSP00000404190	0	0	0	0	0.765	0.379	0.9	0.859	0.997
AURKB	UBE2C	9606.ENSP00000313950	9606.ENSP00000348838	0	0	0	0	0.934	0.064	0.9	0.597	0.997
AURKB	CENPA	9606.ENSP00000313950	9606.ENSP00000336868	0	0	0	0	0.807	0.542	0.9	0.842	0.998
AURKB	CDCA8	9606.ENSP00000313950	9606.ENSP00000362146	0	0	0	0	0.97	0.379	0.9	0.967	0.999
AURKB	KIF20A	9606.ENSP00000313950	9606.ENSP00000378356	0	0	0	0	0.932	0.433	0.9	0.792	0.999
AURKB	KIF2C	9606.ENSP00000313950	9606.ENSP00000361298	0	0	0	0	0.913	0.125	0.9	0.915	0.999
B3GNT3	OGN	9606.ENSP00000321874	9606.ENSP00000262551	0	0	0	0	0.053	0	0.9	0	0.901
B3GNT3	FUT3	9606.ENSP00000321874	9606.ENSP00000305603	0	0	0	0	0.203	0	0.9	0.286	0.938
B3GNT3	PRELP	9606.ENSP00000321874	9606.ENSP00000343924	0	0	0	0	0.053	0	0.9	0	0.901
B3GNT3	FUT2	9606.ENSP00000321874	9606.ENSP00000387498	0	0	0	0	0.045	0	0.9	0.276	0.924
BIRC5	NUP155	9606.ENSP00000301633	9606.ENSP00000231498	0	0	0	0	0.166	0	0.9	0.064	0.915
BIRC5	NCAPG	9606.ENSP00000301633	9606.ENSP00000251496	0	0	0	0	0.891	0.262	0	0.358	0.944
BIRC5	CCNB1	9606.ENSP00000301633	9606.ENSP00000256442	0	0	0	0	0.888	0.185	0.9	0.651	0.996
BIRC5	ESPL1	9606.ENSP00000301633	9606.ENSP00000257934	0	0	0	0	0.869	0	0.9	0.308	0.99
BIRC5	KIF23	9606.ENSP00000301633	9606.ENSP00000260363	0	0	0	0	0.728	0	0.9	0.451	0.983
BIRC5	KIF11	9606.ENSP00000301633	9606.ENSP00000260731	0	0	0	0	0.94	0.052	0	0.451	0.966
BIRC5	NDC80	9606.ENSP00000301633	9606.ENSP00000261597	0	0	0	0	0.926	0	0.9	0.325	0.994
BIRC5	KIF18A	9606.ENSP00000301633	9606.ENSP00000263181	0	0	0	0	0.441	0.05	0.9	0.208	0.952
BIRC5	SGOL1	9606.ENSP00000301633	9606.ENSP00000263753	0	0	0	0	0.728	0	0.9	0.326	0.98
BIRC5	CENPE	9606.ENSP00000301633	9606.ENSP00000265148	0	0	0	0	0.768	0.05	0.9	0.406	0.985
BIRC5	NUF2	9606.ENSP00000301633	9606.ENSP00000271452	0	0	0	0	0.85	0	0.9	0.376	0.989
BIRC5	CCNA2	9606.ENSP00000301633	9606.ENSP00000274026	0	0	0	0	0.921	0.157	0	0.522	0.965
BIRC5	CENPU	9606.ENSP00000301633	9606.ENSP00000281453	0	0	0	0	0.609	0	0.9	0.165	0.964
BIRC5	SPC25	9606.ENSP00000301633	9606.ENSP00000282074	0	0	0	0	0.746	0	0.9	0.086	0.974
BIRC5	CENPH	9606.ENSP00000301633	9606.ENSP00000283006	0	0	0	0	0.603	0	0.9	0.295	0.969
BIRC5	BUB1B	9606.ENSP00000301633	9606.ENSP00000287598	0	0	0	0	0.916	0.185	0.9	0.554	0.996
BIRC5	CCNB2	9606.ENSP00000301633	9606.ENSP00000288207	0	0	0	0	0.88	0.185	0.9	0.577	0.995
BIRC5	MELK	9606.ENSP00000301633	9606.ENSP00000298048	0	0	0	0	0.896	0.085	0	0.413	0.939
BIRC5	KIAA0101	9606.ENSP00000301633	9606.ENSP00000300035	0	0	0	0	0.893	0	0	0.203	0.911
BIRC5	TPX2	9606.ENSP00000301633	9606.ENSP00000300403	0	0	0	0	0.932	0	0	0.47	0.962
BIRC5	CEP55	9606.ENSP00000301633	9606.ENSP00000360540	0	0	0	0	0.834	0	0	0.443	0.903
BIRC5	CKS2	9606.ENSP00000301633	9606.ENSP00000364976	0	0	0	0	0.838	0	0	0.441	0.905
BIRC5	FOXM1	9606.ENSP00000301633	9606.ENSP00000342307	0	0	0	0	0.809	0	0	0.556	0.911
BIRC5	CENPL	9606.ENSP00000301633	9606.ENSP00000348527	0	0	0	0	0.143	0	0.9	0.076	0.913
BIRC5	CENPO	9606.ENSP00000301633	9606.ENSP00000370214	0	0	0	0	0.2	0	0.9	0.05	0.917
BIRC5	MKI67	9606.ENSP00000301633	9606.ENSP00000357643	0	0	0	0	0.841	0	0	0.589	0.932
BIRC5	SPAG5	9606.ENSP00000301633	9606.ENSP00000323300	0	0	0	0	0.903	0	0	0.35	0.934
BIRC5	SGOL2	9606.ENSP00000301633	9606.ENSP00000350447	0	0	0	0	0.352	0	0.9	0.116	0.937
BIRC5	CDCA3	9606.ENSP00000301633	9606.ENSP00000442068	0	0	0	0	0.902	0	0	0.397	0.938
BIRC5	RRM2	9606.ENSP00000301633	9606.ENSP00000353770	0	0	0	0	0.884	0	0	0.491	0.938
BIRC5	CENPI	9606.ENSP00000301633	9606.ENSP00000362018	0	0	0	0	0.401	0	0.9	0.076	0.939
BIRC5	TK1	9606.ENSP00000301633	9606.ENSP00000301634	0	0	0	0	0.892	0	0	0.46	0.939
BIRC5	NEK2	9606.ENSP00000301633	9606.ENSP00000355966	0	0	0	0	0.893	0	0	0.479	0.942
BIRC5	KIF4A	9606.ENSP00000301633	9606.ENSP00000363524	0	0	0	0	0.907	0	0	0.471	0.948
BIRC5	ERCC6L	9606.ENSP00000301633	9606.ENSP00000334675	0	0	0	0	0.481	0	0.9	0.166	0.952
BIRC5	NUSAP1	9606.ENSP00000301633	9606.ENSP00000453403	0	0	0	0	0.91	0	0	0.517	0.954
BIRC5	KNTC1	9606.ENSP00000301633	9606.ENSP00000328236	0	0	0	0	0.616	0	0.9	0.193	0.966
BIRC5	CENPN	9606.ENSP00000301633	9606.ENSP00000377007	0	0	0	0	0.659	0	0.9	0.189	0.969
BIRC5	PBK	9606.ENSP00000301633	9606.ENSP00000428489	0	0	0	0	0.952	0.176	0	0.416	0.974
BIRC5	SPC24	9606.ENSP00000301633	9606.ENSP00000465075	0	0	0	0	0.654	0	0.9	0.333	0.974
BIRC5	UBE2C	9606.ENSP00000301633	9606.ENSP00000348838	0	0	0	0	0.956	0.193	0	0.579	0.983
BIRC5	RACGAP1	9606.ENSP00000301633	9606.ENSP00000404190	0	0	0	0	0.783	0	0.9	0.418	0.986
BIRC5	ZWINT	9606.ENSP00000301633	9606.ENSP00000363055	0	0	0	0	0.78	0	0.9	0.419	0.986
BIRC5	CENPA	9606.ENSP00000301633	9606.ENSP00000336868	0	0	0	0	0.782	0.097	0.9	0.471	0.988
BIRC5	CENPF	9606.ENSP00000301633	9606.ENSP00000355922	0	0	0	0	0.809	0	0.9	0.548	0.99
BIRC5	KIF20A	9606.ENSP00000301633	9606.ENSP00000378356	0	0	0	0	0.875	0	0.9	0.443	0.992
BIRC5	KIF2C	9606.ENSP00000301633	9606.ENSP00000361298	0	0	0	0	0.872	0	0.9	0.447	0.992
BIRC5	BUB1	9606.ENSP00000301633	9606.ENSP00000302530	0	0	0	0	0.901	0.185	0.9	0.592	0.996
BIRC5	CDCA8	9606.ENSP00000301633	9606.ENSP00000362146	0	0	0	0	0.948	0.873	0.9	0.608	0.999
BLM	POLE2	9606.ENSP00000347232	9606.ENSP00000216367	0	0	0	0	0.404	0	0.9	0.4	0.961
BLM	FEN1	9606.ENSP00000347232	9606.ENSP00000305480	0.056	0	0	0	0.356	0.619	0	0.807	0.949
BLM	ERCC6L	9606.ENSP00000347232	9606.ENSP00000334675	0.046	0	0	0	0.278	0.939	0	0.439	0.973
BLM	UBE2T	9606.ENSP00000347232	9606.ENSP00000356243	0	0	0	0	0.228	0.105	0.9	0.116	0.93
BLM	RAD54L	9606.ENSP00000347232	9606.ENSP00000361043	0.046	0	0	0	0.578	0.671	0	0.625	0.943
BLM	RFC4	9606.ENSP00000347232	9606.ENSP00000376272	0	0	0	0	0.379	0.157	0.9	0.506	0.97
BLM	TIMELESS	9606.ENSP00000347232	9606.ENSP00000450607	0	0	0	0	0.294	0.302	0.9	0.616	0.978
BLM	BRCA1	9606.ENSP00000347232	9606.ENSP00000418960	0	0	0	0	0.283	0.678	0.9	0.48	0.986
BLM	XRCC3	9606.ENSP00000347232	9606.ENSP00000451974	0	0	0	0	0.064	0.73	0.9	0.747	0.992
BLM	CHEK1	9606.ENSP00000347232	9606.ENSP00000388648	0	0	0	0	0.564	0.529	0.9	0.746	0.994
BLM	RAD51	9606.ENSP00000347232	9606.ENSP00000372088	0	0	0	0	0.517	0.826	0.9	0.838	0.998
BLM	EXO1	9606.ENSP00000347232	9606.ENSP00000355506	0.056	0	0	0	0.698	0.769	0.9	0.825	0.998
BMP2	DLX5	9606.ENSP00000368104	9606.ENSP00000222598	0	0	0	0	0	0.044	0.9	0.795	0.978
BMP2	SMAD6	9606.ENSP00000368104	9606.ENSP00000288840	0	0	0	0	0.088	0.081	0.9	0.871	0.987
BMP2	CHRDL1	9606.ENSP00000368104	9606.ENSP00000361112	0	0	0	0	0	0.181	0.9	0.4	0.946
BMP2	DLX6	9606.ENSP00000368104	9606.ENSP00000428480	0	0	0	0	0	0.044	0.9	0.193	0.916
BMP2	GREM1	9606.ENSP00000368104	9606.ENSP00000478319	0	0	0	0	0	0.294	0.9	0.821	0.986
BRCA1	POLE2	9606.ENSP00000418960	9606.ENSP00000216367	0	0	0	0	0.364	0	0.9	0.313	0.952
BRCA1	MND1	9606.ENSP00000418960	9606.ENSP00000240488	0	0	0	0	0.341	0	0.9	0.364	0.954
BRCA1	LMNB1	9606.ENSP00000418960	9606.ENSP00000261366	0	0	0	0	0.18	0	0.9	0.293	0.937
BRCA1	CCNE1	9606.ENSP00000418960	9606.ENSP00000262643	0	0	0	0	0.098	0.238	0.9	0.563	0.965
BRCA1	CCNA2	9606.ENSP00000418960	9606.ENSP00000274026	0	0	0	0	0.362	0.379	0.9	0.549	0.979
BRCA1	BUB1B	9606.ENSP00000418960	9606.ENSP00000287598	0	0	0	0	0.499	0	0.72	0.479	0.92
BRCA1	FANCI	9606.ENSP00000418960	9606.ENSP00000310842	0	0	0	0	0.461	0.693	0.9	0.733	0.994
BRCA1	UBE2C	9606.ENSP00000418960	9606.ENSP00000348838	0	0	0	0	0.287	0.157	0.9	0.312	0.953
BRCA1	EXO1	9606.ENSP00000418960	9606.ENSP00000355506	0	0	0	0	0.596	0	0.9	0.724	0.987
BRCA1	CHEK2	9606.ENSP00000418960	9606.ENSP00000372023	0	0	0	0	0.131	0.469	0.9	0.873	0.993
BRCA1	RAD51	9606.ENSP00000418960	9606.ENSP00000372088	0	0	0	0	0.384	0.763	0.9	0.873	0.997
BRCA1	RFC4	9606.ENSP00000418960	9606.ENSP00000376272	0	0	0	0	0.363	0.112	0.9	0.557	0.971
BRCA1	CHEK1	9606.ENSP00000418960	9606.ENSP00000388648	0	0	0	0	0.37	0.348	0.9	0.818	0.991
BRCA1	MCM10	9606.ENSP00000418960	9606.ENSP00000418268	0	0	0	0	0.568	0.693	0	0.313	0.901
BRCA1	TIMELESS	9606.ENSP00000418960	9606.ENSP00000450607	0	0	0	0	0.231	0	0.9	0.244	0.936
BRCA1	XRCC3	9606.ENSP00000418960	9606.ENSP00000451974	0	0	0	0	0.129	0.261	0.9	0.713	0.979
BUB1	CDC6	9606.ENSP00000302530	9606.ENSP00000209728	0	0	0	0	0.871	0.177	0	0.633	0.957
BUB1	OIP5	9606.ENSP00000302530	9606.ENSP00000220514	0	0	0	0	0.9	0	0	0.17	0.913
BUB1	NCAPG	9606.ENSP00000302530	9606.ENSP00000251496	0	0	0	0	0.974	0	0	0.478	0.985
BUB1	CCNB1	9606.ENSP00000302530	9606.ENSP00000256442	0	0	0	0	0.902	0.085	0.9	0.793	0.997
BUB1	ESPL1	9606.ENSP00000302530	9606.ENSP00000257934	0	0	0	0	0.914	0	0.9	0.847	0.998
BUB1	KIF23	9606.ENSP00000302530	9606.ENSP00000260363	0	0	0	0	0.972	0.185	0	0.496	0.987
BUB1	KIF11	9606.ENSP00000302530	9606.ENSP00000260731	0	0	0	0	0.99	0.185	0	0.672	0.997
BUB1	NDC80	9606.ENSP00000302530	9606.ENSP00000261597	0	0	0	0	0.969	0.945	0.9	0.838	0.999
BUB1	MCM4	9606.ENSP00000302530	9606.ENSP00000262105	0	0	0	0	0.966	0.05	0	0.417	0.979
BUB1	KIF18A	9606.ENSP00000302530	9606.ENSP00000263181	0	0	0	0	0.812	0.298	0.9	0.479	0.992
BUB1	SGOL1	9606.ENSP00000302530	9606.ENSP00000263753	0	0	0	0	0.856	0.05	0.9	0.827	0.997
BUB1	CENPE	9606.ENSP00000302530	9606.ENSP00000265148	0	0	0	0	0.941	0.525	0.9	0.87	0.999
BUB1	PLK4	9606.ENSP00000302530	9606.ENSP00000270861	0	0	0	0	0.844	0.247	0	0.531	0.94
BUB1	NUF2	9606.ENSP00000302530	9606.ENSP00000271452	0	0	0	0	0.891	0.939	0.9	0.777	0.999
BUB1	CCNA2	9606.ENSP00000302530	9606.ENSP00000274026	0	0	0	0	0.97	0.079	0	0.698	0.99
BUB1	CENPU	9606.ENSP00000302530	9606.ENSP00000281453	0	0	0	0	0.787	0	0.9	0.5	0.988
BUB1	SPC25	9606.ENSP00000302530	9606.ENSP00000282074	0	0	0	0	0.662	0.929	0.9	0.149	0.997
BUB1	CENPH	9606.ENSP00000302530	9606.ENSP00000283006	0	0	0	0	0.648	0	0.9	0.506	0.981
BUB1	BUB1B	9606.ENSP00000302530	9606.ENSP00000287598	0	0	0	0.582	0.918	0.929	0.9	0.896	0.999
BUB1	CCNB2	9606.ENSP00000302530	9606.ENSP00000288207	0	0	0	0	0.974	0.085	0.9	0.793	0.999
BUB1	MELK	9606.ENSP00000302530	9606.ENSP00000298048	0	0	0	0	0.95	0.056	0	0.535	0.976
BUB1	KIAA0101	9606.ENSP00000302530	9606.ENSP00000300035	0	0	0	0	0.923	0	0	0.118	0.929
BUB1	TPX2	9606.ENSP00000302530	9606.ENSP00000300403	0	0	0	0	0.974	0	0	0.518	0.987
BUB1	KIF14	9606.ENSP00000302530	9606.ENSP00000356319	0	0	0	0	0.809	0.185	0	0.414	0.901
BUB1	FOXM1	9606.ENSP00000302530	9606.ENSP00000342307	0	0	0	0	0.84	0.085	0	0.458	0.914
BUB1	WDHD1	9606.ENSP00000302530	9606.ENSP00000353793	0	0	0	0	0.878	0.262	0	0.18	0.92
BUB1	CDCA3	9606.ENSP00000302530	9606.ENSP00000442068	0	0	0	0	0.89	0	0	0.343	0.924
BUB1	CENPL	9606.ENSP00000302530	9606.ENSP00000348527	0	0	0	0	0.159	0	0.9	0.215	0.928
BUB1	CDKN3	9606.ENSP00000302530	9606.ENSP00000335357	0	0	0	0	0.903	0.058	0	0.278	0.928
BUB1	CKAP2	9606.ENSP00000302530	9606.ENSP00000367276	0	0	0	0	0.928	0	0	0.076	0.931
BUB1	CHEK1	9606.ENSP00000302530	9606.ENSP00000388648	0	0	0	0	0.834	0.064	0	0.659	0.942
BUB1	SPAG5	9606.ENSP00000302530	9606.ENSP00000323300	0	0	0	0	0.92	0	0	0.325	0.944
BUB1	RRM2	9606.ENSP00000302530	9606.ENSP00000353770	0	0	0	0	0.913	0	0	0.424	0.948
BUB1	KIF15	9606.ENSP00000302530	9606.ENSP00000324020	0	0	0	0	0.906	0.185	0	0.437	0.953
BUB1	CENPO	9606.ENSP00000302530	9606.ENSP00000370214	0	0	0	0	0.258	0	0.9	0.44	0.954
BUB1	CEP55	9606.ENSP00000302530	9606.ENSP00000360540	0	0	0	0	0.932	0	0	0.443	0.96
BUB1	PRC1	9606.ENSP00000302530	9606.ENSP00000377793	0	0	0	0	0.922	0.192	0	0.458	0.963
BUB1	NUSAP1	9606.ENSP00000302530	9606.ENSP00000453403	0	0	0	0	0.93	0	0	0.539	0.966
BUB1	RACGAP1	9606.ENSP00000302530	9606.ENSP00000404190	0	0	0	0	0.956	0	0	0.297	0.968
BUB1	PBK	9606.ENSP00000302530	9606.ENSP00000428489	0	0	0	0	0.945	0.064	0	0.44	0.968
BUB1	UBE2C	9606.ENSP00000302530	9606.ENSP00000348838	0	0	0	0	0.938	0	0	0.552	0.971
BUB1	ERCC6L	9606.ENSP00000302530	9606.ENSP00000334675	0	0	0	0	0.599	0.053	0.9	0.357	0.972
BUB1	NEK2	9606.ENSP00000302530	9606.ENSP00000355966	0	0	0	0	0.935	0	0	0.64	0.975
BUB1	MKI67	9606.ENSP00000302530	9606.ENSP00000357643	0	0	0	0	0.942	0	0	0.617	0.976
BUB1	HMMR	9606.ENSP00000302530	9606.ENSP00000377492	0	0	0	0	0.957	0	0	0.595	0.982
BUB1	CENPI	9606.ENSP00000302530	9606.ENSP00000362018	0	0	0	0	0.518	0	0.9	0.679	0.983
BUB1	KIF4A	9606.ENSP00000302530	9606.ENSP00000363524	0	0	0	0	0.959	0.185	0	0.537	0.983
BUB1	CENPN	9606.ENSP00000302530	9606.ENSP00000377007	0	0	0	0	0.812	0	0.9	0.41	0.987
BUB1	SGOL2	9606.ENSP00000302530	9606.ENSP00000350447	0	0	0	0	0.707	0	0.9	0.659	0.989
BUB1	KIF20A	9606.ENSP00000302530	9606.ENSP00000378356	0	0	0	0	0.975	0.185	0	0.528	0.989
BUB1	KNTC1	9606.ENSP00000302530	9606.ENSP00000328236	0	0	0	0	0.818	0	0.9	0.641	0.992
BUB1	CDCA8	9606.ENSP00000302530	9606.ENSP00000362146	0	0	0	0	0.935	0	0.9	0.707	0.997
BUB1	CENPA	9606.ENSP00000302530	9606.ENSP00000336868	0	0	0	0	0.896	0.262	0.9	0.702	0.997
BUB1	SPC24	9606.ENSP00000302530	9606.ENSP00000465075	0	0	0	0	0.341	0.929	0.9	0.608	0.997
BUB1	CENPF	9606.ENSP00000302530	9606.ENSP00000355922	0	0	0	0	0.938	0	0.9	0.732	0.998
BUB1	KIF2C	9606.ENSP00000302530	9606.ENSP00000361298	0	0	0	0	0.945	0.185	0.9	0.699	0.998
BUB1	ZWINT	9606.ENSP00000302530	9606.ENSP00000363055	0	0	0	0	0.728	0.929	0.9	0.669	0.999
BUB1B	TRIP13	9606.ENSP00000287598	9606.ENSP00000166345	0	0	0	0	0.805	0.336	0	0.429	0.919
BUB1B	CDC6	9606.ENSP00000287598	9606.ENSP00000209728	0	0	0	0	0.806	0.177	0	0.571	0.925
BUB1B	NCAPG	9606.ENSP00000287598	9606.ENSP00000251496	0	0	0	0	0.899	0	0	0.286	0.925
BUB1B	CCNB1	9606.ENSP00000287598	9606.ENSP00000256442	0	0	0	0	0.941	0.085	0.9	0.781	0.998
BUB1B	ESPL1	9606.ENSP00000287598	9606.ENSP00000257934	0	0	0	0	0.92	0	0.9	0.834	0.998
BUB1B	KIF23	9606.ENSP00000287598	9606.ENSP00000260363	0	0	0	0	0.891	0.185	0	0.375	0.94
BUB1B	KIF11	9606.ENSP00000287598	9606.ENSP00000260731	0	0	0	0	0.963	0.185	0	0.727	0.991
BUB1B	NDC80	9606.ENSP00000287598	9606.ENSP00000261597	0	0	0	0	0.926	0.399	0.9	0.846	0.999
BUB1B	MCM4	9606.ENSP00000287598	9606.ENSP00000262105	0	0	0	0	0.894	0.05	0	0.276	0.92
BUB1B	KIF18A	9606.ENSP00000287598	9606.ENSP00000263181	0	0	0	0	0.697	0.298	0.9	0.685	0.992
BUB1B	SGOL1	9606.ENSP00000287598	9606.ENSP00000263753	0	0	0	0	0.867	0.384	0.9	0.685	0.997
BUB1B	CENPE	9606.ENSP00000287598	9606.ENSP00000265148	0	0	0	0	0.919	0.525	0.9	0.921	0.999
BUB1B	PLK4	9606.ENSP00000287598	9606.ENSP00000270861	0	0	0	0	0.75	0.247	0	0.572	0.912
BUB1B	NUF2	9606.ENSP00000287598	9606.ENSP00000271452	0	0	0	0	0.798	0.326	0.9	0.745	0.996
BUB1B	CCNA2	9606.ENSP00000287598	9606.ENSP00000274026	0	0	0	0	0.934	0.993	0.9	0.689	0.999
BUB1B	CENPU	9606.ENSP00000287598	9606.ENSP00000281453	0	0	0	0	0.783	0	0.9	0.499	0.988
BUB1B	SPC25	9606.ENSP00000287598	9606.ENSP00000282074	0	0	0	0	0.789	0	0.9	0.126	0.98
BUB1B	CENPH	9606.ENSP00000287598	9606.ENSP00000283006	0	0	0	0	0.408	0	0.9	0.596	0.974
BUB1B	CHEK1	9606.ENSP00000287598	9606.ENSP00000388648	0	0	0	0	0.729	0.064	0	0.667	0.908
BUB1B	CDCA3	9606.ENSP00000287598	9606.ENSP00000442068	0	0	0	0	0.877	0	0	0.392	0.922
BUB1B	CKAP2	9606.ENSP00000287598	9606.ENSP00000367276	0	0	0	0	0.919	0	0	0.12	0.925
BUB1B	E2F8	9606.ENSP00000287598	9606.ENSP00000481103	0	0	0	0	0.914	0	0	0.255	0.933
BUB1B	KIAA0101	9606.ENSP00000287598	9606.ENSP00000300035	0	0	0	0	0.927	0	0	0.163	0.936
BUB1B	CENPL	9606.ENSP00000287598	9606.ENSP00000348527	0	0	0	0	0.175	0	0.9	0.29	0.936
BUB1B	CENPO	9606.ENSP00000287598	9606.ENSP00000370214	0	0	0	0	0.231	0	0.9	0.238	0.936
BUB1B	FOXM1	9606.ENSP00000287598	9606.ENSP00000342307	0	0	0	0	0.816	0.085	0	0.665	0.938
BUB1B	MELK	9606.ENSP00000287598	9606.ENSP00000298048	0	0	0	0	0.907	0.056	0	0.446	0.947
BUB1B	TPX2	9606.ENSP00000287598	9606.ENSP00000300403	0	0	0	0	0.902	0	0	0.5	0.949
BUB1B	MKI67	9606.ENSP00000287598	9606.ENSP00000357643	0	0	0	0	0.92	0	0	0.406	0.951
BUB1B	SPAG5	9606.ENSP00000287598	9606.ENSP00000323300	0	0	0	0	0.923	0	0	0.402	0.952
BUB1B	KIF15	9606.ENSP00000287598	9606.ENSP00000324020	0	0	0	0	0.921	0.185	0	0.338	0.953
BUB1B	CEP55	9606.ENSP00000287598	9606.ENSP00000360540	0	0	0	0	0.921	0	0	0.443	0.954
BUB1B	RACGAP1	9606.ENSP00000287598	9606.ENSP00000404190	0	0	0	0	0.925	0	0	0.443	0.956
BUB1B	NUSAP1	9606.ENSP00000287598	9606.ENSP00000453403	0	0	0	0	0.924	0	0	0.51	0.961
BUB1B	PRC1	9606.ENSP00000287598	9606.ENSP00000377793	0	0	0	0	0.928	0.192	0	0.398	0.962
BUB1B	KIF4A	9606.ENSP00000287598	9606.ENSP00000363524	0	0	0	0	0.932	0.185	0	0.46	0.967
BUB1B	PBK	9606.ENSP00000287598	9606.ENSP00000428489	0	0	0	0	0.942	0.064	0	0.473	0.969
BUB1B	KIF20A	9606.ENSP00000287598	9606.ENSP00000378356	0	0	0	0	0.935	0.185	0	0.495	0.971
BUB1B	RRM2	9606.ENSP00000287598	9606.ENSP00000353770	0	0	0	0	0.948	0	0	0.47	0.971
BUB1B	CENPI	9606.ENSP00000287598	9606.ENSP00000362018	0	0	0	0	0.363	0	0.9	0.63	0.974
BUB1B	SGOL2	9606.ENSP00000287598	9606.ENSP00000350447	0	0	0	0	0.524	0	0.9	0.554	0.976
BUB1B	ERCC6L	9606.ENSP00000287598	9606.ENSP00000334675	0	0	0	0	0.678	0.053	0.9	0.325	0.976
BUB1B	SPC24	9606.ENSP00000287598	9606.ENSP00000465075	0	0	0	0	0.43	0	0.9	0.676	0.979
BUB1B	CENPN	9606.ENSP00000287598	9606.ENSP00000377007	0	0	0	0	0.767	0	0.9	0.433	0.985
BUB1B	KNTC1	9606.ENSP00000287598	9606.ENSP00000328236	0	0	0	0	0.777	0	0.9	0.617	0.99
BUB1B	CENPA	9606.ENSP00000287598	9606.ENSP00000336868	0	0	0	0	0.788	0.262	0.9	0.701	0.994
BUB1B	CENPF	9606.ENSP00000287598	9606.ENSP00000355922	0	0	0	0	0.896	0	0.9	0.683	0.996
BUB1B	CDCA8	9606.ENSP00000287598	9606.ENSP00000362146	0	0	0	0	0.927	0	0.9	0.637	0.997
BUB1B	CCNB2	9606.ENSP00000287598	9606.ENSP00000288207	0	0	0	0	0.93	0.085	0.9	0.699	0.997
BUB1B	UBE2C	9606.ENSP00000287598	9606.ENSP00000348838	0	0	0	0	0.903	0.328	0.9	0.625	0.997
BUB1B	KIF2C	9606.ENSP00000287598	9606.ENSP00000361298	0	0	0	0	0.923	0.185	0.9	0.672	0.997
BUB1B	NEK2	9606.ENSP00000287598	9606.ENSP00000355966	0	0	0	0	0.902	0.993	0.9	0.652	0.999
BUB1B	ZWINT	9606.ENSP00000287598	9606.ENSP00000363055	0	0	0	0	0.806	0.929	0.9	0.669	0.999
C7	C8B	9606.ENSP00000322061	9606.ENSP00000360281	0	0	0	0.74	0.061	0	0.9	0.237	0.907
CACNA2D2	GNG4	9606.ENSP00000418081	9606.ENSP00000375727	0	0	0	0	0.062	0	0.9	0.222	0.92
CALCRL	RAMP3	9606.ENSP00000386972	9606.ENSP00000242249	0	0	0	0	0.061	0.379	0.9	0.952	0.996
CALCRL	RAMP2	9606.ENSP00000386972	9606.ENSP00000253796	0	0	0	0	0.063	0.852	0.9	0.955	0.999
CALCRL	VIP	9606.ENSP00000386972	9606.ENSP00000356213	0	0	0	0	0	0.176	0.9	0.419	0.947
CALCRL	GNG4	9606.ENSP00000386972	9606.ENSP00000375727	0	0	0	0	0.05	0.166	0.9	0	0.913
CALCRL	RXFP1	9606.ENSP00000386972	9606.ENSP00000405841	0	0	0	0	0.061	0	0.9	0.257	0.924
CAMP	CTSH	9606.ENSP00000296435	9606.ENSP00000220166	0	0	0	0	0.061	0	0.9	0	0.902
CAMP	TCN1	9606.ENSP00000296435	9606.ENSP00000257264	0	0	0	0	0.112	0	0.9	0.041	0.907
CAMP	GGH	9606.ENSP00000296435	9606.ENSP00000260118	0	0	0	0	0	0	0.9	0	0.9
CAMP	MMP9	9606.ENSP00000296435	9606.ENSP00000361405	0	0	0	0	0.14	0	0.9	0.327	0.937
CAMP	DEFA4	9606.ENSP00000296435	9606.ENSP00000297435	0	0	0	0	0.749	0	0.9	0.292	0.98
CAV1	ENG	9606.ENSP00000339191	9606.ENSP00000362299	0	0	0	0	0.088	0	0.9	0.338	0.934
CAV1	NOSTRIN	9606.ENSP00000339191	9606.ENSP00000394051	0	0	0	0	0	0	0.9	0.44	0.941
CCL2	CX3CR1	9606.ENSP00000225831	9606.ENSP00000351059	0	0	0	0	0	0	0.6	0.824	0.926
CCL2	FOS	9606.ENSP00000225831	9606.ENSP00000306245	0	0	0	0	0	0	0.9	0.719	0.97
CCL2	IL6	9606.ENSP00000225831	9606.ENSP00000385675	0	0	0	0	0.267	0	0	0.977	0.982
CCNA2	TRIP13	9606.ENSP00000274026	9606.ENSP00000166345	0	0	0	0	0.905	0.165	0	0.132	0.925
CCNA2	CDC6	9606.ENSP00000274026	9606.ENSP00000209728	0	0	0	0	0.906	0.92	0.9	0.876	0.999
CCNA2	MYBL2	9606.ENSP00000274026	9606.ENSP00000217026	0	0	0	0	0.593	0.356	0.8	0.745	0.984
CCNA2	OIP5	9606.ENSP00000274026	9606.ENSP00000220514	0	0	0	0	0.872	0	0	0.255	0.901
CCNA2	GMNN	9606.ENSP00000274026	9606.ENSP00000230056	0	0	0	0	0.618	0.571	0	0.682	0.943
CCNA2	NCAPG	9606.ENSP00000274026	9606.ENSP00000251496	0	0	0	0	0.958	0	0	0.293	0.969
CCNA2	CCNB1	9606.ENSP00000274026	9606.ENSP00000256442	0	0	0	0.738	0.971	0.707	0.72	0.924	0.998
CCNA2	ESPL1	9606.ENSP00000274026	9606.ENSP00000257934	0	0	0	0	0.909	0.186	0	0.543	0.963
CCNA2	KIF23	9606.ENSP00000274026	9606.ENSP00000260363	0	0	0	0	0.939	0.15	0	0.431	0.968
CCNA2	KIF11	9606.ENSP00000274026	9606.ENSP00000260731	0	0	0	0	0.977	0.15	0	0.478	0.989
CCNA2	NDC80	9606.ENSP00000274026	9606.ENSP00000261597	0	0	0	0	0.97	0	0	0.304	0.978
CCNA2	MCM4	9606.ENSP00000274026	9606.ENSP00000262105	0	0	0	0	0.797	0.182	0.9	0.551	0.991
CCNA2	PKMYT1	9606.ENSP00000274026	9606.ENSP00000262300	0	0	0	0	0.585	0.811	0.9	0.382	0.994
CCNA2	CCNE1	9606.ENSP00000274026	9606.ENSP00000262643	0	0	0	0.645	0.393	0.168	0.9	0.773	0.96
CCNA2	SGOL1	9606.ENSP00000274026	9606.ENSP00000263753	0	0	0	0	0.88	0	0	0.285	0.91
CCNA2	MCM2	9606.ENSP00000274026	9606.ENSP00000265056	0	0	0	0	0.846	0.182	0.9	0.641	0.994
CCNA2	CENPE	9606.ENSP00000274026	9606.ENSP00000265148	0	0	0	0	0.963	0.172	0	0.476	0.982
CCNA2	PLK4	9606.ENSP00000274026	9606.ENSP00000270861	0	0	0	0	0.831	0.175	0	0.474	0.92
CCNA2	NUF2	9606.ENSP00000274026	9606.ENSP00000271452	0	0	0	0	0.879	0	0	0.352	0.918
CCNA2	DTL	9606.ENSP00000274026	9606.ENSP00000355958	0	0	0	0	0.826	0	0	0.453	0.9
CCNA2	TYMS	9606.ENSP00000274026	9606.ENSP00000315644	0	0	0	0	0.838	0	0	0.447	0.907
CCNA2	RACGAP1	9606.ENSP00000274026	9606.ENSP00000404190	0	0	0	0	0.878	0.085	0	0.296	0.914
CCNA2	UHRF1	9606.ENSP00000274026	9606.ENSP00000479617	0	0	0	0	0.877	0	0	0.33	0.914
CCNA2	CENPA	9606.ENSP00000274026	9606.ENSP00000336868	0	0	0	0	0.833	0.126	0	0.463	0.915
CCNA2	FEN1	9606.ENSP00000274026	9606.ENSP00000305480	0	0	0	0	0.817	0.402	0	0.333	0.92
CCNA2	CDCA3	9606.ENSP00000274026	9606.ENSP00000442068	0	0	0	0	0.881	0	0	0.412	0.927
CCNA2	NCAPD2	9606.ENSP00000274026	9606.ENSP00000325017	0	0	0	0	0.917	0	0	0.224	0.933
CCNA2	SHCBP1	9606.ENSP00000274026	9606.ENSP00000306473	0	0	0	0	0.929	0	0	0.108	0.934
CCNA2	SPAG5	9606.ENSP00000274026	9606.ENSP00000323300	0	0	0	0	0.922	0	0	0.202	0.935
CCNA2	MCM10	9606.ENSP00000274026	9606.ENSP00000418268	0	0	0	0	0.885	0	0	0.471	0.937
CCNA2	E2F8	9606.ENSP00000274026	9606.ENSP00000481103	0	0	0	0	0.82	0.169	0	0.656	0.944
CCNA2	CENPF	9606.ENSP00000274026	9606.ENSP00000355922	0	0	0	0	0.908	0	0	0.473	0.949
CCNA2	MCM8	9606.ENSP00000274026	9606.ENSP00000368164	0	0	0	0	0.267	0.182	0.9	0.252	0.949
CCNA2	ECT2	9606.ENSP00000274026	9606.ENSP00000376457	0	0	0	0	0.936	0.104	0	0.243	0.952
CCNA2	CHEK1	9606.ENSP00000274026	9606.ENSP00000388648	0	0	0	0	0.853	0.064	0	0.685	0.953
CCNA2	PRC1	9606.ENSP00000274026	9606.ENSP00000377793	0	0	0	0	0.928	0.341	0	0.122	0.954
CCNA2	CEP55	9606.ENSP00000274026	9606.ENSP00000360540	0	0	0	0	0.942	0	0	0.247	0.954
CCNA2	MKI67	9606.ENSP00000274026	9606.ENSP00000357643	0	0	0	0	0.922	0	0	0.444	0.955
CCNA2	KIAA0101	9606.ENSP00000274026	9606.ENSP00000300035	0	0	0	0	0.949	0	0	0.166	0.956
CCNA2	TPX2	9606.ENSP00000274026	9606.ENSP00000300403	0	0	0	0	0.927	0	0	0.417	0.956
CCNA2	KIF15	9606.ENSP00000274026	9606.ENSP00000324020	0	0	0	0	0.933	0.15	0	0.298	0.957
CCNA2	KIF4A	9606.ENSP00000274026	9606.ENSP00000363524	0	0	0	0	0.924	0.15	0	0.389	0.957
CCNA2	CKAP2	9606.ENSP00000274026	9606.ENSP00000367276	0	0	0	0	0.952	0	0	0.195	0.959
CCNA2	MELK	9606.ENSP00000274026	9606.ENSP00000298048	0	0	0	0	0.93	0.186	0	0.36	0.96
CCNA2	RRM2	9606.ENSP00000274026	9606.ENSP00000353770	0	0	0	0	0.927	0	0	0.49	0.961
CCNA2	PBK	9606.ENSP00000274026	9606.ENSP00000428489	0	0	0	0	0.946	0.09	0	0.312	0.963
CCNA2	CDKN3	9606.ENSP00000274026	9606.ENSP00000335357	0	0	0	0	0.887	0.112	0	0.672	0.964
CCNA2	KIF2C	9606.ENSP00000274026	9606.ENSP00000361298	0	0	0	0	0.932	0.15	0	0.43	0.964
CCNA2	NEK2	9606.ENSP00000274026	9606.ENSP00000355966	0	0	0	0	0.919	0	0	0.587	0.965
CCNA2	KIF20A	9606.ENSP00000274026	9606.ENSP00000378356	0	0	0	0	0.938	0.15	0	0.445	0.968
CCNA2	CCNB2	9606.ENSP00000274026	9606.ENSP00000288207	0	0	0	0.743	0.97	0.086	0	0.806	0.977
CCNA2	E2F2	9606.ENSP00000274026	9606.ENSP00000355249	0	0	0	0	0.215	0.261	0.9	0.714	0.981
CCNA2	CDCA8	9606.ENSP00000274026	9606.ENSP00000362146	0	0	0	0	0.974	0	0	0.427	0.984
CCNA2	NUSAP1	9606.ENSP00000274026	9606.ENSP00000453403	0	0	0	0	0.981	0	0	0.409	0.988
CCNA2	E2F1	9606.ENSP00000274026	9606.ENSP00000345571	0	0	0	0	0.313	0.521	0.9	0.714	0.989
CCNA2	CKS2	9606.ENSP00000274026	9606.ENSP00000364976	0	0	0	0	0.838	0.817	0.54	0.509	0.992
CCNA2	FOXM1	9606.ENSP00000274026	9606.ENSP00000342307	0	0	0	0	0.863	0.082	0.9	0.751	0.996
CCNA2	CKS1B	9606.ENSP00000274026	9606.ENSP00000311083	0	0	0	0	0.829	0.801	0.9	0.568	0.998
CCNA2	UBE2C	9606.ENSP00000274026	9606.ENSP00000348838	0	0	0	0	0.956	0.164	0.9	0.646	0.998
CCNA2	CDT1	9606.ENSP00000274026	9606.ENSP00000301019	0	0	0	0	0.812	0.808	0.9	0.702	0.998
CCNB1	CDC6	9606.ENSP00000256442	9606.ENSP00000209728	0	0	0	0	0.809	0.787	0	0.756	0.989
CCNB1	MYBL2	9606.ENSP00000256442	9606.ENSP00000217026	0	0	0	0	0.575	0.185	0.9	0.775	0.991
CCNB1	OIP5	9606.ENSP00000256442	9606.ENSP00000220514	0	0	0	0	0.902	0	0	0.118	0.91
CCNB1	GMNN	9606.ENSP00000256442	9606.ENSP00000230056	0	0	0	0	0.786	0	0	0.639	0.919
CCNB1	NUP155	9606.ENSP00000256442	9606.ENSP00000231498	0	0	0	0	0.231	0.164	0.9	0.055	0.931
CCNB1	NCAPG	9606.ENSP00000256442	9606.ENSP00000251496	0	0	0	0	0.867	0	0.9	0.374	0.99
CCNB1	SPAG5	9606.ENSP00000256442	9606.ENSP00000323300	0	0	0	0	0.872	0	0	0.255	0.9
CCNB1	KIF15	9606.ENSP00000256442	9606.ENSP00000324020	0	0	0	0	0.836	0.15	0	0.382	0.906
CCNB1	CDCA3	9606.ENSP00000256442	9606.ENSP00000442068	0	0	0	0	0.843	0	0	0.447	0.909
CCNB1	KIAA0101	9606.ENSP00000256442	9606.ENSP00000300035	0	0	0	0	0.892	0	0	0.213	0.911
CCNB1	MKI67	9606.ENSP00000256442	9606.ENSP00000357643	0	0	0	0	0.791	0	0	0.596	0.912
CCNB1	MCM4	9606.ENSP00000256442	9606.ENSP00000262105	0	0	0	0	0.781	0.26	0	0.512	0.914
CCNB1	RASGRF1	9606.ENSP00000256442	9606.ENSP00000405963	0	0	0	0	0.061	0.165	0.9	0.066	0.916
CCNB1	CENPL	9606.ENSP00000256442	9606.ENSP00000348527	0	0	0	0	0.191	0	0.9	0.077	0.918
CCNB1	CENPO	9606.ENSP00000256442	9606.ENSP00000370214	0	0	0	0	0.231	0	0.9	0.086	0.923
CCNB1	CDT1	9606.ENSP00000256442	9606.ENSP00000301019	0	0	0	0	0.746	0.354	0	0.577	0.924
CCNB1	NUSAP1	9606.ENSP00000256442	9606.ENSP00000453403	0	0	0	0	0.883	0	0	0.455	0.933
CCNB1	MCM2	9606.ENSP00000256442	9606.ENSP00000265056	0	0	0	0	0.804	0.24	0	0.592	0.934
CCNB1	MCM8	9606.ENSP00000256442	9606.ENSP00000368164	0	0	0	0	0.183	0.182	0.9	0.244	0.942
CCNB1	KIF4A	9606.ENSP00000256442	9606.ENSP00000363524	0	0	0	0	0.888	0.15	0	0.463	0.944
CCNB1	SFN	9606.ENSP00000256442	9606.ENSP00000340989	0	0	0	0	0.059	0.19	0.9	0.441	0.951
CCNB1	CHEK1	9606.ENSP00000256442	9606.ENSP00000388648	0	0	0	0	0.739	0.072	0	0.821	0.953
CCNB1	CCNE1	9606.ENSP00000256442	9606.ENSP00000262643	0	0	0	0.636	0.368	0	0.9	0.802	0.953
CCNB1	CDKN3	9606.ENSP00000256442	9606.ENSP00000335357	0	0	0	0	0.868	0.185	0	0.607	0.954
CCNB1	RRM2	9606.ENSP00000256442	9606.ENSP00000353770	0	0	0	0	0.899	0	0	0.567	0.954
CCNB1	CEP55	9606.ENSP00000256442	9606.ENSP00000360540	0	0	0	0	0.867	0	0	0.671	0.954
CCNB1	CHEK2	9606.ENSP00000256442	9606.ENSP00000372023	0	0	0	0	0.688	0.32	0	0.802	0.954
CCNB1	NEK2	9606.ENSP00000256442	9606.ENSP00000355966	0	0	0	0	0.899	0	0	0.571	0.955
CCNB1	CENPI	9606.ENSP00000256442	9606.ENSP00000362018	0	0	0	0	0.567	0	0.9	0.185	0.961
CCNB1	MELK	9606.ENSP00000256442	9606.ENSP00000298048	0	0	0	0	0.92	0.262	0	0.45	0.964
CCNB1	RACGAP1	9606.ENSP00000256442	9606.ENSP00000404190	0	0	0	0	0.937	0.085	0	0.441	0.965
CCNB1	LMNB1	9606.ENSP00000256442	9606.ENSP00000261366	0	0	0	0	0.47	0	0.9	0.402	0.965
CCNB1	CENPH	9606.ENSP00000256442	9606.ENSP00000283006	0	0	0	0	0.581	0	0.9	0.259	0.966
CCNB1	E2F1	9606.ENSP00000256442	9606.ENSP00000345571	0	0	0	0	0.249	0.169	0.9	0.54	0.967
CCNB1	ERCC6L	9606.ENSP00000256442	9606.ENSP00000334675	0	0	0	0	0.582	0.157	0.9	0.227	0.969
CCNB1	NCAPD2	9606.ENSP00000256442	9606.ENSP00000325017	0	0	0	0	0.669	0	0.9	0.219	0.971
CCNB1	NCAPG2	9606.ENSP00000256442	9606.ENSP00000387007	0	0	0	0	0.68	0	0.9	0.17	0.971
CCNB1	GTSE1	9606.ENSP00000256442	9606.ENSP00000415430	0	0	0	0	0.608	0	0.9	0.36	0.972
CCNB1	TPX2	9606.ENSP00000256442	9606.ENSP00000300403	0	0	0	0	0.946	0	0	0.515	0.972
CCNB1	CENPN	9606.ENSP00000256442	9606.ENSP00000377007	0	0	0	0	0.736	0	0.9	0.142	0.975
CCNB1	PRC1	9606.ENSP00000256442	9606.ENSP00000377793	0	0	0	0	0.941	0.384	0	0.418	0.977
CCNB1	CENPU	9606.ENSP00000256442	9606.ENSP00000281453	0	0	0	0	0.723	0	0.9	0.238	0.977
CCNB1	SGOL1	9606.ENSP00000256442	9606.ENSP00000263753	0	0	0	0	0.694	0.05	0.9	0.389	0.979
CCNB1	KIF18A	9606.ENSP00000256442	9606.ENSP00000263181	0	0	0	0	0.666	0.15	0.9	0.376	0.979
CCNB1	KIF23	9606.ENSP00000256442	9606.ENSP00000260363	0	0	0	0	0.941	0.15	0	0.619	0.979
CCNB1	KIF20A	9606.ENSP00000256442	9606.ENSP00000378356	0	0	0	0	0.956	0.15	0	0.542	0.981
CCNB1	KNTC1	9606.ENSP00000256442	9606.ENSP00000328236	0	0	0	0	0.753	0.186	0.9	0.248	0.982
CCNB1	PBK	9606.ENSP00000256442	9606.ENSP00000428489	0	0	0	0	0.937	0.41	0	0.668	0.986
CCNB1	SPC25	9606.ENSP00000256442	9606.ENSP00000282074	0	0	0	0	0.838	0	0.9	0.223	0.986
CCNB1	KIF11	9606.ENSP00000256442	9606.ENSP00000260731	0	0	0	0	0.939	0.266	0	0.725	0.986
CCNB1	ZWINT	9606.ENSP00000256442	9606.ENSP00000363055	0	0	0	0	0.796	0	0.9	0.399	0.986
CCNB1	SPC24	9606.ENSP00000256442	9606.ENSP00000465075	0	0	0	0	0.848	0	0.9	0.254	0.987
CCNB1	NUF2	9606.ENSP00000256442	9606.ENSP00000271452	0	0	0	0	0.814	0	0.9	0.447	0.988
CCNB1	SGOL2	9606.ENSP00000256442	9606.ENSP00000350447	0	0	0	0	0.863	0	0.9	0.269	0.989
CCNB1	CENPA	9606.ENSP00000256442	9606.ENSP00000336868	0	0	0	0	0.788	0.126	0.9	0.549	0.99
CCNB1	CENPF	9606.ENSP00000256442	9606.ENSP00000355922	0	0	0	0	0.849	0	0.9	0.586	0.993
CCNB1	CENPE	9606.ENSP00000256442	9606.ENSP00000265148	0	0	0	0	0.83	0.15	0.9	0.622	0.993
CCNB1	NDC80	9606.ENSP00000256442	9606.ENSP00000261597	0	0	0	0	0.912	0.387	0.9	0.506	0.996
CCNB1	CKS1B	9606.ENSP00000256442	9606.ENSP00000311083	0	0	0	0	0.81	0.913	0.54	0.569	0.996
CCNB1	KIF2C	9606.ENSP00000256442	9606.ENSP00000361298	0	0	0	0	0.929	0.15	0.9	0.513	0.996
CCNB1	PKMYT1	9606.ENSP00000256442	9606.ENSP00000262300	0	0	0	0	0.405	0.896	0.9	0.709	0.997
CCNB1	FOXM1	9606.ENSP00000256442	9606.ENSP00000342307	0	0	0	0	0.811	0.349	0.9	0.827	0.997
CCNB1	CDCA8	9606.ENSP00000256442	9606.ENSP00000362146	0	0	0	0	0.968	0	0.9	0.544	0.998
CCNB1	UBE2C	9606.ENSP00000256442	9606.ENSP00000348838	0	0	0	0	0.924	0.164	0.9	0.825	0.998
CCNB1	CCNB2	9606.ENSP00000256442	9606.ENSP00000288207	0	0	0	0.943	0.955	0.945	0.9	0.839	0.999
CCNB1	CKS2	9606.ENSP00000256442	9606.ENSP00000364976	0	0	0	0	0.878	0.95	0.54	0.781	0.999
CCNB1	ESPL1	9606.ENSP00000256442	9606.ENSP00000257934	0	0	0	0	0.629	0.995	0	0.809	0.999
CCNB2	CDC6	9606.ENSP00000288207	9606.ENSP00000209728	0	0	0	0	0.748	0.707	0	0.691	0.975
CCNB2	MYBL2	9606.ENSP00000288207	9606.ENSP00000217026	0	0	0	0	0.604	0.185	0.9	0.482	0.981
CCNB2	GMNN	9606.ENSP00000288207	9606.ENSP00000230056	0	0	0	0	0.847	0	0	0.474	0.916
CCNB2	NUP155	9606.ENSP00000288207	9606.ENSP00000231498	0	0	0	0	0.229	0.164	0.9	0	0.929
CCNB2	NCAPG	9606.ENSP00000288207	9606.ENSP00000251496	0	0	0	0	0.937	0	0.9	0.398	0.995
CCNB2	ESPL1	9606.ENSP00000288207	9606.ENSP00000257934	0	0	0	0	0.919	0.352	0	0.711	0.983
CCNB2	KIF23	9606.ENSP00000288207	9606.ENSP00000260363	0	0	0	0	0.944	0.15	0	0.649	0.982
CCNB2	KIF11	9606.ENSP00000288207	9606.ENSP00000260731	0	0	0	0	0.964	0.266	0	0.709	0.991
CCNB2	NDC80	9606.ENSP00000288207	9606.ENSP00000261597	0	0	0	0	0.961	0	0.9	0.578	0.998
CCNB2	MCM4	9606.ENSP00000288207	9606.ENSP00000262105	0	0	0	0	0.817	0.26	0	0.548	0.933
CCNB2	PKMYT1	9606.ENSP00000288207	9606.ENSP00000262300	0	0	0	0	0.607	0.717	0.9	0.668	0.995
CCNB2	KIF18A	9606.ENSP00000288207	9606.ENSP00000263181	0	0	0	0	0.599	0.15	0.9	0.285	0.972
CCNB2	SGOL1	9606.ENSP00000288207	9606.ENSP00000263753	0	0	0	0	0.865	0.05	0.9	0.267	0.989
CCNB2	MCM2	9606.ENSP00000288207	9606.ENSP00000265056	0	0	0	0	0.865	0.803	0	0.592	0.988
CCNB2	CENPE	9606.ENSP00000288207	9606.ENSP00000265148	0	0	0	0	0.87	0.15	0.9	0.499	0.993
CCNB2	PLK4	9606.ENSP00000288207	9606.ENSP00000270861	0	0	0	0	0.801	0.175	0	0.499	0.91
CCNB2	NUF2	9606.ENSP00000288207	9606.ENSP00000271452	0	0	0	0	0.872	0	0.9	0.409	0.991
CCNB2	CENPU	9606.ENSP00000288207	9606.ENSP00000281453	0	0	0	0	0.758	0	0.9	0.211	0.979
CCNB2	SPC25	9606.ENSP00000288207	9606.ENSP00000282074	0	0	0	0	0.843	0	0.9	0.184	0.986
CCNB2	CENPH	9606.ENSP00000288207	9606.ENSP00000283006	0	0	0	0	0.585	0	0.9	0.291	0.968
CCNB2	CHEK2	9606.ENSP00000288207	9606.ENSP00000372023	0	0	0	0	0.68	0.32	0	0.61	0.908
CCNB2	CENPL	9606.ENSP00000288207	9606.ENSP00000348527	0	0	0	0	0.127	0	0.9	0.058	0.91
CCNB2	ECT2	9606.ENSP00000288207	9606.ENSP00000376457	0	0	0	0	0.86	0.143	0	0.314	0.91
CCNB2	CEP55	9606.ENSP00000288207	9606.ENSP00000360540	0	0	0	0	0.852	0	0	0.448	0.914
CCNB2	CDKN3	9606.ENSP00000288207	9606.ENSP00000335357	0	0	0	0	0.857	0.185	0	0.363	0.919
CCNB2	CENPO	9606.ENSP00000288207	9606.ENSP00000370214	0	0	0	0	0.232	0	0.9	0	0.92
CCNB2	MKI67	9606.ENSP00000288207	9606.ENSP00000357643	0	0	0	0	0.859	0	0	0.455	0.92
CCNB2	CDT1	9606.ENSP00000288207	9606.ENSP00000301019	0	0	0	0	0.867	0	0	0.427	0.92
CCNB2	SFN	9606.ENSP00000288207	9606.ENSP00000340989	0	0	0	0	0.061	0.19	0.9	0.142	0.926
CCNB2	CHEK1	9606.ENSP00000288207	9606.ENSP00000388648	0	0	0	0	0.815	0.072	0	0.657	0.936
CCNB2	SGOL2	9606.ENSP00000288207	9606.ENSP00000350447	0	0	0	0	0.328	0	0.9	0.186	0.94
CCNB2	KIF15	9606.ENSP00000288207	9606.ENSP00000324020	0	0	0	0	0.889	0.15	0	0.427	0.941
CCNB2	CENPI	9606.ENSP00000288207	9606.ENSP00000362018	0	0	0	0	0.4	0	0.9	0.118	0.942
CCNB2	KIAA0101	9606.ENSP00000288207	9606.ENSP00000300035	0	0	0	0	0.936	0	0	0.136	0.943
CCNB2	ERCC6L	9606.ENSP00000288207	9606.ENSP00000334675	0	0	0	0	0.37	0.157	0.9	0.129	0.947
CCNB2	SPAG5	9606.ENSP00000288207	9606.ENSP00000323300	0	0	0	0	0.928	0	0	0.331	0.95
CCNB2	RACGAP1	9606.ENSP00000288207	9606.ENSP00000404190	0	0	0	0	0.934	0.085	0	0.369	0.958
CCNB2	RRM2	9606.ENSP00000288207	9606.ENSP00000353770	0	0	0	0	0.909	0	0	0.559	0.958
CCNB2	PRC1	9606.ENSP00000288207	9606.ENSP00000377793	0	0	0	0	0.9	0.191	0	0.542	0.959
CCNB2	TPX2	9606.ENSP00000288207	9606.ENSP00000300403	0	0	0	0	0.935	0	0	0.426	0.961
CCNB2	CDCA3	9606.ENSP00000288207	9606.ENSP00000442068	0	0	0	0	0.926	0	0	0.494	0.961
CCNB2	SPC24	9606.ENSP00000288207	9606.ENSP00000465075	0	0	0	0	0.555	0	0.9	0.211	0.961
CCNB2	KIF4A	9606.ENSP00000288207	9606.ENSP00000363524	0	0	0	0	0.924	0.15	0	0.504	0.965
CCNB2	PBK	9606.ENSP00000288207	9606.ENSP00000428489	0	0	0	0	0.951	0.09	0	0.354	0.968
CCNB2	MELK	9606.ENSP00000288207	9606.ENSP00000298048	0	0	0	0	0.919	0.262	0	0.51	0.968
CCNB2	KNTC1	9606.ENSP00000288207	9606.ENSP00000328236	0	0	0	0	0.547	0.186	0.9	0.288	0.97
CCNB2	NCAPD2	9606.ENSP00000288207	9606.ENSP00000325017	0	0	0	0	0.644	0	0.9	0.276	0.972
CCNB2	NUSAP1	9606.ENSP00000288207	9606.ENSP00000453403	0	0	0	0	0.956	0	0	0.534	0.978
CCNB2	KIF20A	9606.ENSP00000288207	9606.ENSP00000378356	0	0	0	0	0.952	0.15	0	0.542	0.979
CCNB2	NEK2	9606.ENSP00000288207	9606.ENSP00000355966	0	0	0	0	0.955	0	0	0.564	0.979
CCNB2	CENPN	9606.ENSP00000288207	9606.ENSP00000377007	0	0	0	0	0.841	0	0.9	0.206	0.986
CCNB2	GTSE1	9606.ENSP00000288207	9606.ENSP00000415430	0	0	0	0	0.791	0	0.9	0.417	0.986
CCNB2	ZWINT	9606.ENSP00000288207	9606.ENSP00000363055	0	0	0	0	0.799	0	0.9	0.448	0.987
CCNB2	CENPA	9606.ENSP00000288207	9606.ENSP00000336868	0	0	0	0	0.81	0.126	0.9	0.499	0.99
CCNB2	FOXM1	9606.ENSP00000288207	9606.ENSP00000342307	0	0	0	0	0.819	0.082	0.9	0.527	0.991
CCNB2	UBE2C	9606.ENSP00000288207	9606.ENSP00000348838	0	0	0	0	0.976	0.164	0	0.696	0.993
CCNB2	CKS1B	9606.ENSP00000288207	9606.ENSP00000311083	0	0	0	0	0.868	0.924	0	0.491	0.994
CCNB2	CENPF	9606.ENSP00000288207	9606.ENSP00000355922	0	0	0	0	0.901	0	0.9	0.544	0.995
CCNB2	KIF2C	9606.ENSP00000288207	9606.ENSP00000361298	0	0	0	0	0.914	0.15	0.9	0.526	0.996
CCNB2	CDCA8	9606.ENSP00000288207	9606.ENSP00000362146	0	0	0	0	0.938	0	0.9	0.578	0.997
CCNB2	CKS2	9606.ENSP00000288207	9606.ENSP00000364976	0	0	0	0	0.921	0.916	0	0.627	0.997
CCNE1	CDC6	9606.ENSP00000262643	9606.ENSP00000209728	0	0	0	0	0.597	0.503	0.9	0.695	0.993
CCNE1	CKS2	9606.ENSP00000262643	9606.ENSP00000364976	0	0	0	0	0.202	0.865	0.36	0.315	0.946
CCNE1	E2F2	9606.ENSP00000262643	9606.ENSP00000355249	0	0	0	0	0.106	0.169	0.9	0.563	0.963
CCNE1	FOXM1	9606.ENSP00000262643	9606.ENSP00000342307	0	0	0	0	0.198	0.405	0.9	0.453	0.97
CCNE1	E2F1	9606.ENSP00000262643	9606.ENSP00000345571	0	0	0	0	0.246	0.388	0.9	0.592	0.978
CCNE1	CDT1	9606.ENSP00000262643	9606.ENSP00000301019	0	0	0	0	0.35	0.305	0.9	0.605	0.979
CCNE1	CKS1B	9606.ENSP00000262643	9606.ENSP00000311083	0	0	0	0	0.162	0.87	0.9	0.343	0.991
CD93	STOM	9606.ENSP00000246006	9606.ENSP00000286713	0	0	0	0	0.07	0	0.9	0	0.903
CD93	PTPRB	9606.ENSP00000246006	9606.ENSP00000334928	0	0	0	0	0.108	0	0.9	0	0.907
CD93	PLAU	9606.ENSP00000246006	9606.ENSP00000361850	0	0	0	0	0.056	0	0.9	0.116	0.909
CD93	MCEMP1	9606.ENSP00000246006	9606.ENSP00000329920	0	0	0	0	0.191	0	0.9	0	0.915
CDC6	EXO1	9606.ENSP00000209728	9606.ENSP00000355506	0.073	0	0	0	0.867	0	0	0.337	0.911
CDC6	NCAPG	9606.ENSP00000209728	9606.ENSP00000251496	0	0	0	0	0.905	0	0	0.138	0.914
CDC6	RRM2	9606.ENSP00000209728	9606.ENSP00000353770	0	0	0	0	0.861	0	0	0.503	0.928
CDC6	KIF11	9606.ENSP00000209728	9606.ENSP00000260731	0	0	0	0	0.9	0.054	0	0.301	0.928
CDC6	ESPL1	9606.ENSP00000209728	9606.ENSP00000257934	0	0	0	0	0.844	0.327	0	0.569	0.95
CDC6	WDHD1	9606.ENSP00000209728	9606.ENSP00000353793	0	0	0	0	0.923	0.064	0	0.591	0.968
CDC6	GINS2	9606.ENSP00000209728	9606.ENSP00000253462	0	0	0	0	0.935	0	0	0.547	0.969
CDC6	UBE2C	9606.ENSP00000209728	9606.ENSP00000348838	0	0	0	0	0.723	0.085	0.9	0.437	0.983
CDC6	DTL	9606.ENSP00000209728	9606.ENSP00000355958	0	0	0	0	0.967	0	0	0.678	0.989
CDC6	E2F1	9606.ENSP00000209728	9606.ENSP00000345571	0	0	0	0	0.289	0.715	0.9	0.631	0.991
CDC6	POLE2	9606.ENSP00000209728	9606.ENSP00000216367	0	0	0	0	0.88	0.076	0.9	0.351	0.991
CDC6	RFC4	9606.ENSP00000209728	9606.ENSP00000376272	0.093	0	0	0	0.749	0.261	0.9	0.596	0.992
CDC6	GMNN	9606.ENSP00000209728	9606.ENSP00000230056	0	0	0	0	0.588	0	0.9	0.875	0.994
CDC6	CHEK1	9606.ENSP00000209728	9606.ENSP00000388648	0	0	0	0	0.735	0.269	0.9	0.829	0.996
CDC6	MCM8	9606.ENSP00000209728	9606.ENSP00000368164	0.052	0	0	0	0.415	0.826	0.9	0.825	0.998
CDC6	MCM10	9606.ENSP00000209728	9606.ENSP00000418268	0	0	0	0	0.821	0.834	0.9	0.87	0.999
CDC6	MCM2	9606.ENSP00000209728	9606.ENSP00000265056	0.052	0	0	0	0.829	0.947	0.9	0.949	0.999
CDC6	CDT1	9606.ENSP00000209728	9606.ENSP00000301019	0	0	0	0	0.941	0.837	0.9	0.957	0.999
CDC6	MCM4	9606.ENSP00000209728	9606.ENSP00000262105	0.052	0	0	0	0.915	0.797	0.9	0.885	0.999
CDCA2	NUF2	9606.ENSP00000328228	9606.ENSP00000271452	0	0	0	0	0.658	0	0	0.73	0.904
CDCA2	PBK	9606.ENSP00000328228	9606.ENSP00000428489	0	0	0	0	0.871	0	0	0.314	0.907
CDCA3	KIF11	9606.ENSP00000442068	9606.ENSP00000260731	0	0	0	0	0.879	0	0	0.399	0.924
CDCA3	CENPE	9606.ENSP00000442068	9606.ENSP00000265148	0	0	0	0	0.894	0	0	0.274	0.92
CDCA3	KIAA0101	9606.ENSP00000442068	9606.ENSP00000300035	0	0	0	0	0.868	0	0	0.561	0.939
CDCA3	TPX2	9606.ENSP00000442068	9606.ENSP00000300403	0	0	0	0	0.877	0	0	0.241	0.902
CDCA3	SPAG5	9606.ENSP00000442068	9606.ENSP00000323300	0	0	0	0	0.867	0	0	0.311	0.904
CDCA3	UBE2C	9606.ENSP00000442068	9606.ENSP00000348838	0	0	0	0	0.929	0	0	0.43	0.957
CDCA3	RRM2	9606.ENSP00000442068	9606.ENSP00000353770	0	0	0	0	0.867	0	0	0.287	0.901
CDCA3	KIF2C	9606.ENSP00000442068	9606.ENSP00000361298	0	0	0	0	0.9	0	0	0.329	0.93
CDCA3	CDCA8	9606.ENSP00000442068	9606.ENSP00000362146	0	0	0	0	0.924	0	0	0.573	0.966
CDCA3	KIF4A	9606.ENSP00000442068	9606.ENSP00000363524	0	0	0	0	0.881	0	0	0.35	0.919
CDCA3	KIF20A	9606.ENSP00000442068	9606.ENSP00000378356	0	0	0	0	0.896	0	0	0.473	0.942
CDCA3	PBK	9606.ENSP00000442068	9606.ENSP00000428489	0	0	0	0	0.938	0	0	0.388	0.96
CDCA3	NUSAP1	9606.ENSP00000442068	9606.ENSP00000453403	0	0	0	0	0.884	0	0	0.389	0.926
CDCA8	OIP5	9606.ENSP00000362146	9606.ENSP00000220514	0	0	0	0	0.901	0	0	0.308	0.928
CDCA8	NUP155	9606.ENSP00000362146	9606.ENSP00000231498	0	0	0	0	0.182	0	0.9	0.051	0.915
CDCA8	NCAPG	9606.ENSP00000362146	9606.ENSP00000251496	0	0	0	0	0.932	0	0	0.348	0.953
CDCA8	TROAP	9606.ENSP00000362146	9606.ENSP00000257909	0	0	0	0	0.918	0	0	0.108	0.924
CDCA8	ESPL1	9606.ENSP00000362146	9606.ENSP00000257934	0	0	0	0	0.923	0	0.9	0.428	0.995
CDCA8	KIF23	9606.ENSP00000362146	9606.ENSP00000260363	0	0	0	0	0.875	0	0.9	0.529	0.993
CDCA8	KIF11	9606.ENSP00000362146	9606.ENSP00000260731	0	0	0	0	0.966	0	0	0.537	0.983
CDCA8	NDC80	9606.ENSP00000362146	9606.ENSP00000261597	0	0	0	0	0.96	0	0.9	0.567	0.998
CDCA8	KIF18A	9606.ENSP00000362146	9606.ENSP00000263181	0	0	0	0	0.608	0	0.9	0.221	0.966
CDCA8	SGOL1	9606.ENSP00000362146	9606.ENSP00000263753	0	0	0	0	0.867	0.313	0.9	0.619	0.996
CDCA8	CENPE	9606.ENSP00000362146	9606.ENSP00000265148	0	0	0	0	0.96	0	0.9	0.611	0.998
CDCA8	NUF2	9606.ENSP00000362146	9606.ENSP00000271452	0	0	0	0	0.875	0	0.9	0.594	0.994
CDCA8	CENPU	9606.ENSP00000362146	9606.ENSP00000281453	0	0	0	0	0.573	0	0.9	0.223	0.963
CDCA8	SPC25	9606.ENSP00000362146	9606.ENSP00000282074	0	0	0	0	0.642	0	0.9	0.297	0.972
CDCA8	CENPH	9606.ENSP00000362146	9606.ENSP00000283006	0	0	0	0	0.359	0	0.9	0.566	0.969
CDCA8	MELK	9606.ENSP00000362146	9606.ENSP00000298048	0	0	0	0	0.91	0	0	0.44	0.947
CDCA8	KIAA0101	9606.ENSP00000362146	9606.ENSP00000300035	0	0	0	0	0.922	0	0	0.117	0.928
CDCA8	TPX2	9606.ENSP00000362146	9606.ENSP00000300403	0	0	0	0	0.926	0	0	0.49	0.961
CDCA8	SHCBP1	9606.ENSP00000362146	9606.ENSP00000306473	0	0	0	0	0.855	0	0	0.5	0.924
CDCA8	CKS1B	9606.ENSP00000362146	9606.ENSP00000311083	0	0	0	0	0.927	0	0	0.202	0.939
CDCA8	SPAG5	9606.ENSP00000362146	9606.ENSP00000323300	0	0	0	0	0.915	0	0	0.394	0.946
CDCA8	KIF15	9606.ENSP00000362146	9606.ENSP00000324020	0	0	0	0	0.891	0	0	0.398	0.931
CDCA8	NCAPD2	9606.ENSP00000362146	9606.ENSP00000325017	0	0	0	0	0.875	0	0	0.265	0.904
CDCA8	KNTC1	9606.ENSP00000362146	9606.ENSP00000328236	0	0	0	0	0.656	0	0.9	0.463	0.979
CDCA8	ERCC6L	9606.ENSP00000362146	9606.ENSP00000334675	0	0	0	0	0.645	0	0.9	0.133	0.966
CDCA8	CENPA	9606.ENSP00000362146	9606.ENSP00000336868	0	0	0	0	0.793	0	0.9	0.627	0.991
CDCA8	FOXM1	9606.ENSP00000362146	9606.ENSP00000342307	0	0	0	0	0.907	0	0	0.305	0.933
CDCA8	CENPL	9606.ENSP00000362146	9606.ENSP00000348527	0	0	0	0	0.162	0	0.9	0.067	0.915
CDCA8	UBE2C	9606.ENSP00000362146	9606.ENSP00000348838	0	0	0	0	0.961	0	0	0.423	0.976
CDCA8	SGOL2	9606.ENSP00000362146	9606.ENSP00000350447	0	0	0	0	0.547	0.313	0.9	0.451	0.98
CDCA8	RRM2	9606.ENSP00000362146	9606.ENSP00000353770	0	0	0	0	0.918	0	0	0.29	0.939
CDCA8	CENPF	9606.ENSP00000362146	9606.ENSP00000355922	0	0	0	0	0.89	0	0.9	0.537	0.994
CDCA8	NEK2	9606.ENSP00000362146	9606.ENSP00000355966	0	0	0	0	0.915	0	0	0.52	0.957
CDCA8	MKI67	9606.ENSP00000362146	9606.ENSP00000357643	0	0	0	0	0.922	0	0	0.258	0.939
CDCA8	CEP55	9606.ENSP00000362146	9606.ENSP00000360540	0	0	0	0	0.912	0	0	0.417	0.946
CDCA8	KIF2C	9606.ENSP00000362146	9606.ENSP00000361298	0	0	0	0	0.931	0.114	0.9	0.658	0.997
CDCA8	CENPI	9606.ENSP00000362146	9606.ENSP00000362018	0	0	0	0	0.491	0	0.9	0.352	0.964
CDCA8	ECT2	9606.ENSP00000362146	9606.ENSP00000376457	0	0	0	0	0.852	0	0	0.374	0.903
CDCA8	E2F8	9606.ENSP00000362146	9606.ENSP00000481103	0	0	0	0	0.869	0	0	0.5	0.932
CDCA8	CENPO	9606.ENSP00000362146	9606.ENSP00000370214	0	0	0	0	0.26	0	0.9	0.198	0.935
CDCA8	KIF4A	9606.ENSP00000362146	9606.ENSP00000363524	0	0	0	0	0.889	0	0	0.486	0.94
CDCA8	PBK	9606.ENSP00000362146	9606.ENSP00000428489	0	0	0	0	0.915	0	0	0.33	0.941
CDCA8	NUSAP1	9606.ENSP00000362146	9606.ENSP00000453403	0	0	0	0	0.966	0	0	0.479	0.981
CDCA8	SPC24	9606.ENSP00000362146	9606.ENSP00000465075	0	0	0	0	0.743	0	0.9	0.349	0.981
CDCA8	ZWINT	9606.ENSP00000362146	9606.ENSP00000363055	0	0	0	0	0.792	0	0.9	0.352	0.985
CDCA8	CENPN	9606.ENSP00000362146	9606.ENSP00000377007	0	0	0	0	0.822	0	0.9	0.3	0.986
CDCA8	RACGAP1	9606.ENSP00000362146	9606.ENSP00000404190	0	0	0	0	0.812	0	0.9	0.524	0.99
CDCA8	KIF20A	9606.ENSP00000362146	9606.ENSP00000378356	0	0	0	0	0.92	0.116	0.9	0.571	0.996
CDH3	CDH5	9606.ENSP00000264012	9606.ENSP00000344115	0	0	0	0.715	0	0	0.9	0.625	0.917
CDH5	PTPRB	9606.ENSP00000344115	9606.ENSP00000334928	0	0	0	0	0.172	0.472	0	0.795	0.902
CDH5	CLDN5	9606.ENSP00000344115	9606.ENSP00000385477	0	0	0	0	0.367	0	0	0.871	0.915
CDH5	PECAM1	9606.ENSP00000344115	9606.ENSP00000457421	0	0	0	0	0.143	0	0.8	0.938	0.988
CDKN3	NCAPG	9606.ENSP00000335357	9606.ENSP00000251496	0	0	0	0	0.904	0.053	0	0.058	0.907
CDKN3	MELK	9606.ENSP00000335357	9606.ENSP00000298048	0	0	0	0	0.9	0.182	0	0.097	0.919
CDKN3	PRC1	9606.ENSP00000335357	9606.ENSP00000377793	0	0	0	0	0.819	0.267	0	0.376	0.91
CDKN3	PBK	9606.ENSP00000335357	9606.ENSP00000428489	0	0	0	0	0.904	0.131	0	0.113	0.92
CDO1	GAD1	9606.ENSP00000250535	9606.ENSP00000350928	0	0	0	0	0.062	0	0.9	0.165	0.914
CDT1	GMNN	9606.ENSP00000301019	9606.ENSP00000230056	0	0	0	0	0.378	0.981	0.9	0.977	0.999
CDT1	MCM4	9606.ENSP00000301019	9606.ENSP00000262105	0	0	0	0	0.943	0.379	0.9	0.881	0.999
CDT1	MCM2	9606.ENSP00000301019	9606.ENSP00000265056	0	0	0	0	0.935	0.412	0.9	0.916	0.999
CDT1	CKS2	9606.ENSP00000301019	9606.ENSP00000364976	0	0	0	0	0.299	0.864	0	0.145	0.911
CDT1	CKS1B	9606.ENSP00000301019	9606.ENSP00000311083	0	0	0	0	0.39	0.873	0	0.209	0.933
CDT1	CHEK1	9606.ENSP00000301019	9606.ENSP00000388648	0	0	0	0	0.742	0	0	0.826	0.953
CDT1	E2F1	9606.ENSP00000301019	9606.ENSP00000345571	0	0	0	0	0.405	0	0.9	0.394	0.96
CDT1	MCM8	9606.ENSP00000301019	9606.ENSP00000368164	0	0	0	0	0.622	0.267	0.9	0.695	0.99
CDT1	DTL	9606.ENSP00000301019	9606.ENSP00000355958	0	0	0	0	0.887	0.379	0	0.949	0.996
CDT1	MCM10	9606.ENSP00000301019	9606.ENSP00000418268	0	0	0	0	0.805	0.186	0.9	0.874	0.997
CEACAM5	LY6D	9606.ENSP00000221992	9606.ENSP00000301263	0	0	0	0	0	0	0.9	0	0.9
CEACAM5	LYPD3	9606.ENSP00000221992	9606.ENSP00000244333	0	0	0	0	0	0	0.9	0.074	0.903
CENPA	OIP5	9606.ENSP00000336868	9606.ENSP00000220514	0	0	0	0	0.78	0.542	0.9	0.548	0.994
CENPA	NCAPG	9606.ENSP00000336868	9606.ENSP00000251496	0	0	0	0	0.894	0.157	0	0.262	0.928
CENPA	ESPL1	9606.ENSP00000336868	9606.ENSP00000257934	0	0	0	0	0.483	0	0.9	0.507	0.972
CENPA	KIF11	9606.ENSP00000336868	9606.ENSP00000260731	0	0	0	0	0.808	0.08	0	0.515	0.906
CENPA	NDC80	9606.ENSP00000336868	9606.ENSP00000261597	0	0	0	0	0.788	0.166	0.9	0.721	0.994
CENPA	KIF18A	9606.ENSP00000336868	9606.ENSP00000263181	0	0	0	0	0.559	0.08	0.9	0.43	0.973
CENPA	SGOL1	9606.ENSP00000336868	9606.ENSP00000263753	0	0	0	0	0	0	0.9	0.501	0.947
CENPA	CENPE	9606.ENSP00000336868	9606.ENSP00000265148	0	0	0	0	0.778	0.08	0.9	0.71	0.993
CENPA	NUF2	9606.ENSP00000336868	9606.ENSP00000271452	0	0	0	0	0.574	0.162	0.9	0.716	0.988
CENPA	CENPU	9606.ENSP00000336868	9606.ENSP00000281453	0	0	0	0	0.563	0.328	0.9	0.75	0.991
CENPA	SPC25	9606.ENSP00000336868	9606.ENSP00000282074	0	0	0	0	0.728	0	0.9	0.151	0.974
CENPA	CENPH	9606.ENSP00000336868	9606.ENSP00000283006	0	0	0	0	0.273	0.222	0.9	0.8	0.987
CENPA	MELK	9606.ENSP00000336868	9606.ENSP00000298048	0	0	0	0	0.821	0.075	0	0.446	0.9
CENPA	TPX2	9606.ENSP00000336868	9606.ENSP00000300403	0	0	0	0	0.823	0	0	0.497	0.907
CENPA	KNTC1	9606.ENSP00000336868	9606.ENSP00000328236	0	0	0	0	0.314	0	0.9	0.278	0.946
CENPA	ERCC6L	9606.ENSP00000336868	9606.ENSP00000334675	0	0	0	0	0.561	0.176	0.9	0.408	0.975
CENPA	KIF20A	9606.ENSP00000336868	9606.ENSP00000378356	0	0	0	0	0.833	0.08	0	0.474	0.912
CENPA	UBE2C	9606.ENSP00000336868	9606.ENSP00000348838	0	0	0	0	0.892	0.189	0	0.322	0.935
CENPA	SGOL2	9606.ENSP00000336868	9606.ENSP00000350447	0	0	0	0	0.19	0	0.9	0.33	0.941
CENPA	SPC24	9606.ENSP00000336868	9606.ENSP00000465075	0	0	0	0	0.154	0	0.9	0.63	0.966
CENPA	CENPL	9606.ENSP00000336868	9606.ENSP00000348527	0	0	0	0	0.076	0	0.9	0.71	0.97
CENPA	CENPO	9606.ENSP00000336868	9606.ENSP00000370214	0	0	0	0	0.168	0.222	0.9	0.673	0.976
CENPA	CENPI	9606.ENSP00000336868	9606.ENSP00000362018	0	0	0	0	0.179	0.339	0.9	0.794	0.987
CENPA	ZWINT	9606.ENSP00000336868	9606.ENSP00000363055	0	0	0	0	0.778	0	0.9	0.59	0.99
CENPA	CENPF	9606.ENSP00000336868	9606.ENSP00000355922	0	0	0	0	0.786	0	0.9	0.672	0.992
CENPA	KIF2C	9606.ENSP00000336868	9606.ENSP00000361298	0	0	0	0	0.818	0.08	0.9	0.67	0.993
CENPA	CENPN	9606.ENSP00000336868	9606.ENSP00000377007	0	0	0	0	0.68	0.837	0.9	0.851	0.999
CENPE	NCAPG	9606.ENSP00000265148	9606.ENSP00000251496	0	0	0	0	0.967	0.064	0	0.378	0.979
CENPE	ESPL1	9606.ENSP00000265148	9606.ENSP00000257934	0	0	0	0	0.671	0.125	0.9	0.558	0.985
CENPE	KIF23	9606.ENSP00000265148	9606.ENSP00000260363	0	0	0	0.595	0.884	0	0.9	0.763	0.991
CENPE	KIF11	9606.ENSP00000265148	9606.ENSP00000260731	0	0	0	0.624	0.969	0.194	0.9	0.891	0.998
CENPE	NDC80	9606.ENSP00000265148	9606.ENSP00000261597	0	0	0	0	0.961	0.526	0.9	0.833	0.999
CENPE	KIF18A	9606.ENSP00000265148	9606.ENSP00000263181	0	0	0	0.643	0.774	0.263	0.9	0.877	0.987
CENPE	SGOL1	9606.ENSP00000265148	9606.ENSP00000263753	0	0	0	0	0.689	0	0.9	0.618	0.987
CENPE	UBE2C	9606.ENSP00000265148	9606.ENSP00000348838	0	0	0	0	0.821	0.084	0	0.461	0.904
CENPE	KIF26B	9606.ENSP00000265148	9606.ENSP00000385545	0	0	0	0.54	0	0	0.9	0.133	0.904
CENPE	SPAG5	9606.ENSP00000265148	9606.ENSP00000323300	0	0	0	0	0.839	0	0	0.49	0.914
CENPE	CEP55	9606.ENSP00000265148	9606.ENSP00000360540	0	0	0	0	0.885	0.085	0	0.462	0.938
CENPE	NEK2	9606.ENSP00000265148	9606.ENSP00000355966	0	0	0	0	0.881	0	0	0.532	0.942
CENPE	CKAP2	9606.ENSP00000265148	9606.ENSP00000367276	0	0	0	0	0.937	0	0	0.211	0.948
CENPE	CENPL	9606.ENSP00000265148	9606.ENSP00000348527	0	0	0	0	0.125	0	0.9	0.471	0.949
CENPE	CENPO	9606.ENSP00000265148	9606.ENSP00000370214	0	0	0	0	0.196	0	0.9	0.527	0.958
CENPE	ECT2	9606.ENSP00000265148	9606.ENSP00000376457	0	0	0	0	0.937	0.054	0	0.389	0.96
CENPE	TPX2	9606.ENSP00000265148	9606.ENSP00000300403	0	0	0	0	0.883	0	0	0.675	0.96
CENPE	SPC25	9606.ENSP00000265148	9606.ENSP00000282074	0	0	0	0	0.567	0	0.9	0.219	0.963
CENPE	MKI67	9606.ENSP00000265148	9606.ENSP00000357643	0	0	0	0	0.955	0	0	0.262	0.965
CENPE	NUSAP1	9606.ENSP00000265148	9606.ENSP00000453403	0	0	0	0	0.956	0	0	0.318	0.969
CENPE	ERCC6L	9606.ENSP00000265148	9606.ENSP00000334675	0	0	0	0	0.628	0.056	0.9	0.294	0.971
CENPE	SPC24	9606.ENSP00000265148	9606.ENSP00000465075	0	0	0	0	0.393	0	0.9	0.564	0.971
CENPE	SGOL2	9606.ENSP00000265148	9606.ENSP00000350447	0	0	0	0	0.458	0	0.9	0.555	0.973
CENPE	CENPI	9606.ENSP00000265148	9606.ENSP00000362018	0	0	0	0	0.4	0	0.9	0.677	0.978
CENPE	CENPH	9606.ENSP00000265148	9606.ENSP00000283006	0	0	0	0	0.379	0	0.9	0.68	0.978
CENPE	PRC1	9606.ENSP00000265148	9606.ENSP00000377793	0	0	0	0	0.887	0.47	0	0.723	0.982
CENPE	CENPU	9606.ENSP00000265148	9606.ENSP00000281453	0	0	0	0	0.691	0	0.9	0.522	0.983
CENPE	CENPN	9606.ENSP00000265148	9606.ENSP00000377007	0	0	0	0	0.749	0	0.9	0.485	0.985
CENPE	ZWINT	9606.ENSP00000265148	9606.ENSP00000363055	0	0	0	0	0.677	0	0.9	0.617	0.986
CENPE	RACGAP1	9606.ENSP00000265148	9606.ENSP00000404190	0	0	0	0	0.703	0.186	0.9	0.612	0.989
CENPE	KNTC1	9606.ENSP00000265148	9606.ENSP00000328236	0	0	0	0	0.739	0	0.9	0.641	0.989
CENPE	KIF2C	9606.ENSP00000265148	9606.ENSP00000361298	0	0	0	0.616	0.869	0	0.9	0.771	0.99
CENPE	KIF15	9606.ENSP00000265148	9606.ENSP00000324020	0	0	0	0.606	0.909	0	0.9	0.62	0.992
CENPE	KIF4A	9606.ENSP00000265148	9606.ENSP00000363524	0	0	0	0.631	0.917	0	0.9	0.745	0.993
CENPE	KIF20A	9606.ENSP00000265148	9606.ENSP00000378356	0	0	0	0.572	0.923	0	0.9	0.61	0.994
CENPE	NUF2	9606.ENSP00000265148	9606.ENSP00000271452	0	0	0	0	0.825	0.45	0.9	0.831	0.998
CENPE	CENPF	9606.ENSP00000265148	9606.ENSP00000355922	0	0	0	0	0.957	0.379	0.9	0.894	0.999
CENPF	NCAPG	9606.ENSP00000355922	9606.ENSP00000251496	0	0	0	0	0.922	0	0	0.446	0.955
CENPF	ESPL1	9606.ENSP00000355922	9606.ENSP00000257934	0	0	0	0	0.872	0	0.9	0.44	0.992
CENPF	KIF23	9606.ENSP00000355922	9606.ENSP00000260363	0	0	0	0	0.835	0	0	0.48	0.91
CENPF	KIF11	9606.ENSP00000355922	9606.ENSP00000260731	0	0	0	0	0.926	0	0	0.548	0.965
CENPF	NDC80	9606.ENSP00000355922	9606.ENSP00000261597	0	0	0	0	0.909	0	0.9	0.635	0.996
CENPF	KIF18A	9606.ENSP00000355922	9606.ENSP00000263181	0	0	0	0	0.778	0	0.9	0.496	0.987
CENPF	SGOL1	9606.ENSP00000355922	9606.ENSP00000263753	0	0	0	0	0.598	0	0.9	0.476	0.977
CENPF	NUF2	9606.ENSP00000355922	9606.ENSP00000271452	0	0	0	0	0.892	0	0.9	0.601	0.995
CENPF	CENPU	9606.ENSP00000355922	9606.ENSP00000281453	0	0	0	0	0.683	0.114	0.9	0.361	0.979
CENPF	SPC25	9606.ENSP00000355922	9606.ENSP00000282074	0	0	0	0	0.427	0	0.9	0.225	0.951
CENPF	CENPH	9606.ENSP00000355922	9606.ENSP00000283006	0	0	0	0	0.386	0	0.9	0.619	0.974
CENPF	MELK	9606.ENSP00000355922	9606.ENSP00000298048	0	0	0	0	0.874	0	0	0.427	0.924
CENPF	TPX2	9606.ENSP00000355922	9606.ENSP00000300403	0	0	0	0	0.891	0	0	0.51	0.944
CENPF	SPAG5	9606.ENSP00000355922	9606.ENSP00000323300	0	0	0	0	0.886	0	0	0.354	0.923
CENPF	KIF15	9606.ENSP00000355922	9606.ENSP00000324020	0	0	0	0	0.902	0	0	0.506	0.949
CENPF	KNTC1	9606.ENSP00000355922	9606.ENSP00000328236	0	0	0	0	0.804	0	0.9	0.457	0.988
CENPF	ERCC6L	9606.ENSP00000355922	9606.ENSP00000334675	0	0	0	0	0.561	0	0.9	0.065	0.955
CENPF	FOXM1	9606.ENSP00000355922	9606.ENSP00000342307	0	0	0	0	0.82	0	0.9	0.572	0.991
CENPF	CENPL	9606.ENSP00000355922	9606.ENSP00000348527	0	0	0	0	0.155	0	0.9	0.422	0.946
CENPF	UBE2C	9606.ENSP00000355922	9606.ENSP00000348838	0	0	0	0	0.85	0	0	0.51	0.923
CENPF	SGOL2	9606.ENSP00000355922	9606.ENSP00000350447	0	0	0	0	0.598	0	0.9	0.441	0.975
CENPF	RRM2	9606.ENSP00000355922	9606.ENSP00000353770	0	0	0	0	0.915	0	0	0.423	0.948
CENPF	KIF4A	9606.ENSP00000355922	9606.ENSP00000363524	0	0	0	0	0.837	0	0	0.423	0.902
CENPF	HMMR	9606.ENSP00000355922	9606.ENSP00000377492	0	0	0	0	0.88	0	0	0.409	0.926
CENPF	CKAP2	9606.ENSP00000355922	9606.ENSP00000367276	0	0	0	0	0.918	0	0	0.19	0.931
CENPF	PBK	9606.ENSP00000355922	9606.ENSP00000428489	0	0	0	0	0.917	0	0	0.42	0.95
CENPF	CENPO	9606.ENSP00000355922	9606.ENSP00000370214	0	0	0	0	0.184	0	0.9	0.518	0.957
CENPF	KIF20A	9606.ENSP00000355922	9606.ENSP00000378356	0	0	0	0	0.927	0	0	0.477	0.96
CENPF	SPC24	9606.ENSP00000355922	9606.ENSP00000465075	0	0	0	0	0.275	0	0.9	0.51	0.961
CENPF	MKI67	9606.ENSP00000355922	9606.ENSP00000357643	0	0	0	0	0.931	0	0	0.473	0.962
CENPF	NEK2	9606.ENSP00000355922	9606.ENSP00000355966	0	0	0	0	0.893	0	0	0.675	0.963
CENPF	CEP55	9606.ENSP00000355922	9606.ENSP00000360540	0	0	0	0	0.934	0	0	0.53	0.967
CENPF	NUSAP1	9606.ENSP00000355922	9606.ENSP00000453403	0	0	0	0	0.95	0	0	0.49	0.973
CENPF	CENPI	9606.ENSP00000355922	9606.ENSP00000362018	0	0	0	0	0.363	0	0.9	0.644	0.975
CENPF	CENPN	9606.ENSP00000355922	9606.ENSP00000377007	0	0	0	0	0.681	0	0.9	0.445	0.98
CENPF	ZWINT	9606.ENSP00000355922	9606.ENSP00000363055	0	0	0	0	0.678	0	0.9	0.557	0.984
CENPF	KIF2C	9606.ENSP00000355922	9606.ENSP00000361298	0	0	0	0	0.884	0	0.9	0.63	0.995
CENPH	OIP5	9606.ENSP00000283006	9606.ENSP00000220514	0	0	0	0	0.439	0	0.9	0.128	0.946
CENPH	ESPL1	9606.ENSP00000283006	9606.ENSP00000257934	0	0	0	0	0.205	0	0.9	0.075	0.92
CENPH	NDC80	9606.ENSP00000283006	9606.ENSP00000261597	0	0	0	0	0.385	0.522	0.9	0.699	0.99
CENPH	KIF18A	9606.ENSP00000283006	9606.ENSP00000263181	0	0	0	0	0.334	0	0.9	0.418	0.957
CENPH	SGOL1	9606.ENSP00000283006	9606.ENSP00000263753	0	0	0	0	0.282	0	0.9	0.285	0.944
CENPH	NUF2	9606.ENSP00000283006	9606.ENSP00000271452	0	0	0	0	0.664	0.522	0.9	0.586	0.992
CENPH	CENPU	9606.ENSP00000283006	9606.ENSP00000281453	0	0	0	0	0.547	0.564	0.9	0.83	0.996
CENPH	SPC25	9606.ENSP00000283006	9606.ENSP00000282074	0	0	0	0	0.456	0.332	0.9	0.173	0.965
CENPH	ERCC6L	9606.ENSP00000283006	9606.ENSP00000334675	0	0	0	0	0.243	0	0.9	0	0.921
CENPH	SGOL2	9606.ENSP00000283006	9606.ENSP00000350447	0	0	0	0	0.353	0	0.9	0.302	0.95
CENPH	KNTC1	9606.ENSP00000283006	9606.ENSP00000328236	0	0	0	0	0.453	0	0.9	0.316	0.959
CENPH	ZWINT	9606.ENSP00000283006	9606.ENSP00000363055	0	0	0	0	0.315	0	0.9	0.541	0.965
CENPH	SPC24	9606.ENSP00000283006	9606.ENSP00000465075	0	0	0	0	0.253	0	0.9	0.639	0.97
CENPH	KIF2C	9606.ENSP00000283006	9606.ENSP00000361298	0	0	0	0	0.415	0.379	0.9	0.426	0.976
CENPH	CENPL	9606.ENSP00000283006	9606.ENSP00000348527	0	0	0	0	0.108	0.443	0.9	0.841	0.991
CENPH	CENPN	9606.ENSP00000283006	9606.ENSP00000377007	0	0	0	0	0.373	0.438	0.9	0.873	0.994
CENPH	CENPI	9606.ENSP00000283006	9606.ENSP00000362018	0	0	0	0	0.287	0.566	0.9	0.918	0.997
CENPH	CENPO	9606.ENSP00000283006	9606.ENSP00000370214	0	0	0	0	0.131	0.782	0.9	0.886	0.997
CENPI	OIP5	9606.ENSP00000362018	9606.ENSP00000220514	0	0	0	0	0.229	0	0.9	0.385	0.948
CENPI	ESPL1	9606.ENSP00000362018	9606.ENSP00000257934	0	0	0	0	0.221	0	0.9	0.267	0.938
CENPI	NDC80	9606.ENSP00000362018	9606.ENSP00000261597	0	0	0	0	0.585	0.192	0.9	0.773	0.991
CENPI	KIF18A	9606.ENSP00000362018	9606.ENSP00000263181	0	0	0	0	0.269	0	0.9	0.472	0.958
CENPI	SGOL1	9606.ENSP00000362018	9606.ENSP00000263753	0	0	0	0	0.639	0	0.9	0.285	0.971
CENPI	NUF2	9606.ENSP00000362018	9606.ENSP00000271452	0	0	0	0	0.491	0	0.9	0.809	0.989
CENPI	CENPU	9606.ENSP00000362018	9606.ENSP00000281453	0	0	0	0	0.221	0.826	0.9	0.837	0.997
CENPI	SPC25	9606.ENSP00000362018	9606.ENSP00000282074	0	0	0	0	0.357	0	0.9	0.167	0.941
CENPI	KNTC1	9606.ENSP00000362018	9606.ENSP00000328236	0	0	0	0	0.398	0	0.9	0.354	0.957
CENPI	ERCC6L	9606.ENSP00000362018	9606.ENSP00000334675	0	0	0	0	0.598	0.132	0.9	0.074	0.963
CENPI	CENPL	9606.ENSP00000362018	9606.ENSP00000348527	0	0	0	0	0.16	0.443	0.9	0.838	0.991
CENPI	SGOL2	9606.ENSP00000362018	9606.ENSP00000350447	0	0	0	0	0.451	0	0.9	0.162	0.95
CENPI	KIF2C	9606.ENSP00000362018	9606.ENSP00000361298	0	0	0	0	0.269	0	0.9	0.416	0.953
CENPI	ZWINT	9606.ENSP00000362018	9606.ENSP00000363055	0	0	0	0	0.162	0	0.9	0.568	0.96
CENPI	SPC24	9606.ENSP00000362018	9606.ENSP00000465075	0	0	0	0	0.249	0	0.9	0.615	0.968
CENPI	CENPN	9606.ENSP00000362018	9606.ENSP00000377007	0	0	0	0	0.449	0.131	0.9	0.855	0.992
CENPI	CENPO	9606.ENSP00000362018	9606.ENSP00000370214	0	0	0	0	0.151	0.763	0.9	0.856	0.996
CENPL	OIP5	9606.ENSP00000348527	9606.ENSP00000220514	0	0	0	0	0.113	0	0.9	0	0.907
CENPL	ESPL1	9606.ENSP00000348527	9606.ENSP00000257934	0	0	0	0	0.109	0	0.9	0.112	0.914
CENPL	NDC80	9606.ENSP00000348527	9606.ENSP00000261597	0	0	0	0	0.147	0	0.9	0.366	0.941
CENPL	KIF18A	9606.ENSP00000348527	9606.ENSP00000263181	0	0	0	0	0.137	0	0.9	0.397	0.943
CENPL	SGOL1	9606.ENSP00000348527	9606.ENSP00000263753	0	0	0	0	0.103	0	0.9	0.442	0.945
CENPL	NUF2	9606.ENSP00000348527	9606.ENSP00000271452	0	0	0	0	0.171	0	0.9	0.492	0.954
CENPL	CENPU	9606.ENSP00000348527	9606.ENSP00000281453	0	0	0	0	0.1	0.131	0.9	0.766	0.979
CENPL	SPC25	9606.ENSP00000348527	9606.ENSP00000282074	0	0	0	0	0.123	0	0.9	0	0.908
CENPL	KNTC1	9606.ENSP00000348527	9606.ENSP00000328236	0	0	0	0	0.16	0	0.9	0	0.912
CENPL	ERCC6L	9606.ENSP00000348527	9606.ENSP00000334675	0	0	0	0	0.118	0	0.9	0	0.908
CENPL	KIF2C	9606.ENSP00000348527	9606.ENSP00000361298	0	0	0	0	0.108	0	0.9	0.304	0.932
CENPL	ZWINT	9606.ENSP00000348527	9606.ENSP00000363055	0	0	0	0	0.089	0	0.9	0.32	0.932
CENPL	SGOL2	9606.ENSP00000348527	9606.ENSP00000350447	0	0	0	0	0.117	0	0.9	0.373	0.939
CENPL	SPC24	9606.ENSP00000348527	9606.ENSP00000465075	0	0	0	0	0.152	0	0.9	0.473	0.951
CENPL	CENPO	9606.ENSP00000348527	9606.ENSP00000370214	0	0	0	0	0.085	0	0.9	0.893	0.989
CENPL	CENPN	9606.ENSP00000348527	9606.ENSP00000377007	0	0	0	0	0.16	0.131	0.9	0.924	0.993
CENPN	OIP5	9606.ENSP00000377007	9606.ENSP00000220514	0	0	0	0	0.778	0	0.9	0.26	0.982
CENPN	ESPL1	9606.ENSP00000377007	9606.ENSP00000257934	0	0	0	0	0.527	0	0.9	0.045	0.95
CENPN	NDC80	9606.ENSP00000377007	9606.ENSP00000261597	0	0	0	0	0.837	0	0.9	0.531	0.991
CENPN	KIF18A	9606.ENSP00000377007	9606.ENSP00000263181	0	0	0	0	0.417	0	0.9	0.314	0.956
CENPN	SGOL1	9606.ENSP00000377007	9606.ENSP00000263753	0	0	0	0	0.784	0	0.9	0.353	0.984
CENPN	NUF2	9606.ENSP00000377007	9606.ENSP00000271452	0	0	0	0	0.633	0	0.9	0.358	0.974
CENPN	CENPU	9606.ENSP00000377007	9606.ENSP00000281453	0	0	0	0	0.598	0.547	0.9	0.812	0.996
CENPN	SPC25	9606.ENSP00000377007	9606.ENSP00000282074	0	0	0	0	0.468	0	0.9	0	0.944
CENPN	KNTC1	9606.ENSP00000377007	9606.ENSP00000328236	0	0	0	0	0.52	0	0.9	0.269	0.961
CENPN	ERCC6L	9606.ENSP00000377007	9606.ENSP00000334675	0	0	0	0	0.319	0	0.9	0.124	0.935
CENPN	SGOL2	9606.ENSP00000377007	9606.ENSP00000350447	0	0	0	0	0.423	0	0.9	0.268	0.954
CENPN	KIF2C	9606.ENSP00000377007	9606.ENSP00000361298	0	0	0	0	0.748	0	0.9	0.41	0.983
CENPN	ZWINT	9606.ENSP00000377007	9606.ENSP00000363055	0	0	0	0	0.563	0	0.9	0.511	0.976
CENPN	CENPO	9606.ENSP00000377007	9606.ENSP00000370214	0	0	0	0	0.161	0.72	0.9	0.792	0.994
CENPN	SPC24	9606.ENSP00000377007	9606.ENSP00000465075	0	0	0	0	0.271	0	0.9	0.474	0.958
CENPO	OIP5	9606.ENSP00000370214	9606.ENSP00000220514	0	0	0	0	0.174	0	0.9	0.06	0.915
CENPO	ESPL1	9606.ENSP00000370214	9606.ENSP00000257934	0	0	0	0	0.116	0	0.9	0.053	0.909
CENPO	NDC80	9606.ENSP00000370214	9606.ENSP00000261597	0	0	0	0	0.148	0	0.9	0.608	0.963
CENPO	KIF18A	9606.ENSP00000370214	9606.ENSP00000263181	0	0	0	0	0.157	0	0.9	0.415	0.946
CENPO	SGOL1	9606.ENSP00000370214	9606.ENSP00000263753	0	0	0	0	0.129	0	0.9	0.352	0.938
CENPO	NUF2	9606.ENSP00000370214	9606.ENSP00000271452	0	0	0	0	0.213	0	0.9	0.521	0.959
CENPO	CENPU	9606.ENSP00000370214	9606.ENSP00000281453	0	0	0	0	0.193	0.854	0.9	0.878	0.998
CENPO	SPC25	9606.ENSP00000370214	9606.ENSP00000282074	0	0	0	0	0.114	0	0.9	0.258	0.928
CENPO	KNTC1	9606.ENSP00000370214	9606.ENSP00000328236	0	0	0	0	0.112	0	0.9	0.068	0.91
CENPO	ERCC6L	9606.ENSP00000370214	9606.ENSP00000334675	0	0	0	0	0.159	0	0.9	0	0.912
CENPO	SGOL2	9606.ENSP00000370214	9606.ENSP00000350447	0	0	0	0	0.1	0	0.9	0.162	0.917
CENPO	KIF2C	9606.ENSP00000370214	9606.ENSP00000361298	0	0	0	0	0.297	0	0.9	0.417	0.955
CENPO	ZWINT	9606.ENSP00000370214	9606.ENSP00000363055	0	0	0	0	0.267	0	0.9	0.444	0.955
CENPO	SPC24	9606.ENSP00000370214	9606.ENSP00000465075	0	0	0	0	0.117	0	0.9	0.526	0.954
CENPU	OIP5	9606.ENSP00000281453	9606.ENSP00000220514	0	0	0	0	0.783	0	0.9	0.528	0.988
CENPU	ESPL1	9606.ENSP00000281453	9606.ENSP00000257934	0	0	0	0	0.228	0	0.9	0.11	0.925
CENPU	NDC80	9606.ENSP00000281453	9606.ENSP00000261597	0	0	0	0	0.787	0	0.9	0.732	0.993
CENPU	KIF18A	9606.ENSP00000281453	9606.ENSP00000263181	0	0	0	0	0.568	0	0.9	0.377	0.97
CENPU	SGOL1	9606.ENSP00000281453	9606.ENSP00000263753	0	0	0	0	0.179	0	0.9	0.409	0.947
CENPU	NUF2	9606.ENSP00000281453	9606.ENSP00000271452	0	0	0	0	0.722	0	0.9	0.355	0.98
CENPU	SPC25	9606.ENSP00000281453	9606.ENSP00000282074	0	0	0	0	0.293	0	0.9	0	0.926
CENPU	SGOL2	9606.ENSP00000281453	9606.ENSP00000350447	0	0	0	0	0.283	0	0.9	0.143	0.933
CENPU	SPC24	9606.ENSP00000281453	9606.ENSP00000465075	0	0	0	0	0.16	0	0.9	0.444	0.949
CENPU	ERCC6L	9606.ENSP00000281453	9606.ENSP00000334675	0	0	0	0	0.298	0	0.9	0.389	0.953
CENPU	KNTC1	9606.ENSP00000281453	9606.ENSP00000328236	0	0	0	0	0.575	0	0.9	0.182	0.962
CENPU	KIF2C	9606.ENSP00000281453	9606.ENSP00000361298	0	0	0	0	0.682	0	0.9	0.348	0.977
CENPU	ZWINT	9606.ENSP00000281453	9606.ENSP00000363055	0	0	0	0	0.795	0	0.9	0.481	0.988
CEP55	NCAPG	9606.ENSP00000360540	9606.ENSP00000251496	0	0	0	0	0.923	0	0	0.318	0.945
CEP55	KIF23	9606.ENSP00000360540	9606.ENSP00000260363	0	0	0	0	0.85	0.317	0	0.81	0.979
CEP55	KIF11	9606.ENSP00000360540	9606.ENSP00000260731	0	0	0	0	0.957	0.085	0	0.428	0.975
CEP55	NDC80	9606.ENSP00000360540	9606.ENSP00000261597	0	0	0	0	0.91	0	0	0.268	0.932
CEP55	NUF2	9606.ENSP00000360540	9606.ENSP00000271452	0	0	0	0	0.832	0	0	0.496	0.912
CEP55	MELK	9606.ENSP00000360540	9606.ENSP00000298048	0	0	0	0	0.909	0	0	0.389	0.942
CEP55	SPAG5	9606.ENSP00000360540	9606.ENSP00000323300	0	0	0	0	0.913	0	0	0.32	0.938
CEP55	KIF15	9606.ENSP00000360540	9606.ENSP00000324020	0	0	0	0	0.892	0.085	0	0.387	0.934
CEP55	FOXM1	9606.ENSP00000360540	9606.ENSP00000342307	0	0	0	0	0.826	0	0	0.671	0.94
CEP55	UBE2C	9606.ENSP00000360540	9606.ENSP00000348838	0	0	0	0	0.911	0	0	0.535	0.957
CEP55	RRM2	9606.ENSP00000360540	9606.ENSP00000353770	0	0	0	0	0.92	0	0	0.473	0.956
CEP55	NEK2	9606.ENSP00000360540	9606.ENSP00000355966	0	0	0	0	0.87	0	0	0.408	0.919
CEP55	KIF14	9606.ENSP00000360540	9606.ENSP00000356319	0	0	0	0	0.843	0.085	0	0.359	0.9
CEP55	MKI67	9606.ENSP00000360540	9606.ENSP00000357643	0	0	0	0	0.916	0	0	0.519	0.958
CEP55	CKAP2	9606.ENSP00000360540	9606.ENSP00000367276	0	0	0	0	0.871	0	0	0.254	0.9
CEP55	PRC1	9606.ENSP00000360540	9606.ENSP00000377793	0	0	0	0	0.836	0	0	0.442	0.904
CEP55	KIF4A	9606.ENSP00000360540	9606.ENSP00000363524	0	0	0	0	0.825	0.085	0	0.508	0.914
CEP55	HMMR	9606.ENSP00000360540	9606.ENSP00000377492	0	0	0	0	0.907	0	0	0.258	0.928
CEP55	KIF2C	9606.ENSP00000360540	9606.ENSP00000361298	0	0	0	0	0.905	0.085	0	0.427	0.946
CEP55	PBK	9606.ENSP00000360540	9606.ENSP00000428489	0	0	0	0	0.924	0	0	0.45	0.956
CEP55	RACGAP1	9606.ENSP00000360540	9606.ENSP00000404190	0	0	0	0	0.858	0.268	0	0.701	0.966
CEP55	KIF20A	9606.ENSP00000360540	9606.ENSP00000378356	0	0	0	0	0.915	0.177	0	0.56	0.966
CEP55	NUSAP1	9606.ENSP00000360540	9606.ENSP00000453403	0	0	0	0	0.957	0	0	0.474	0.976
CEP72	NEK2	9606.ENSP00000264935	9606.ENSP00000355966	0	0	0	0	0.063	0	0.9	0	0.902
CEP72	TPX2	9606.ENSP00000264935	9606.ENSP00000300403	0	0	0	0	0.097	0	0.9	0	0.905
CEP72	HMMR	9606.ENSP00000264935	9606.ENSP00000377492	0	0	0	0	0.103	0	0.9	0	0.906
CEP72	PLK4	9606.ENSP00000264935	9606.ENSP00000270861	0	0	0	0	0.107	0	0.9	0.181	0.92
CETP	LPL	9606.ENSP00000200676	9606.ENSP00000309757	0	0	0	0	0.064	0.379	0.54	0.796	0.938
CFD	VWF	9606.ENSP00000332139	9606.ENSP00000261405	0	0	0	0	0.077	0	0.9	0.158	0.915
CFD	FIGF	9606.ENSP00000332139	9606.ENSP00000297904	0	0	0	0	0	0	0.9	0.054	0.901
CFD	LEFTY2	9606.ENSP00000332139	9606.ENSP00000355785	0	0	0	0	0	0	0.9	0	0.9
CFD	MMRN1	9606.ENSP00000332139	9606.ENSP00000378431	0	0	0	0	0.063	0	0.9	0.085	0.906
CFD	SERPINA1	9606.ENSP00000332139	9606.ENSP00000416066	0	0	0	0	0.085	0.129	0.9	0.138	0.922
CFTR	SH3GL3	9606.ENSP00000003084	9606.ENSP00000320092	0	0	0	0	0	0	0.9	0.041	0.9
CFTR	IL7R	9606.ENSP00000003084	9606.ENSP00000306157	0	0	0	0	0.048	0	0.9	0	0.9
CFTR	EDN1	9606.ENSP00000003084	9606.ENSP00000368683	0	0	0	0	0	0	0.9	0.198	0.916
CHAF1A	MCM2	9606.ENSP00000301280	9606.ENSP00000265056	0	0	0	0	0.892	0.093	0	0.248	0.92
CHAF1A	CHAF1B	9606.ENSP00000301280	9606.ENSP00000315700	0	0	0	0	0.536	0.521	0.9	0.902	0.997
CHEK1	MCM4	9606.ENSP00000388648	9606.ENSP00000262105	0	0	0	0	0.775	0.308	0.9	0.79	0.996
CHEK1	MCM2	9606.ENSP00000388648	9606.ENSP00000265056	0	0	0	0	0.733	0.373	0.9	0.775	0.995
CHEK1	FEN1	9606.ENSP00000388648	9606.ENSP00000305480	0	0	0	0	0.777	0.178	0	0.729	0.946
CHEK1	TYMS	9606.ENSP00000388648	9606.ENSP00000315644	0	0	0	0	0.811	0.275	0	0.597	0.94
CHEK1	RRM2	9606.ENSP00000388648	9606.ENSP00000353770	0	0	0	0	0.799	0	0	0.556	0.907
CHEK1	EXO1	9606.ENSP00000388648	9606.ENSP00000355506	0	0	0	0	0.739	0.265	0.9	0.898	0.997
CHEK1	DTL	9606.ENSP00000388648	9606.ENSP00000355958	0	0	0	0	0.845	0.379	0	0.734	0.972
CHEK1	UBE2T	9606.ENSP00000388648	9606.ENSP00000356243	0	0	0	0	0.374	0.377	0.9	0.353	0.971
CHEK1	MCM8	9606.ENSP00000388648	9606.ENSP00000368164	0	0	0	0	0.199	0.166	0.9	0.387	0.953
CHEK1	CHEK2	9606.ENSP00000388648	9606.ENSP00000372023	0	0	0.242	0.67	0.273	0.763	0.8	0.981	0.976
CHEK1	RAD51	9606.ENSP00000388648	9606.ENSP00000372088	0	0	0	0	0.664	0.521	0.9	0.944	0.999
CHEK1	RFC4	9606.ENSP00000388648	9606.ENSP00000376272	0	0	0	0	0.734	0.157	0.9	0.541	0.988
CHEK1	RASGRF1	9606.ENSP00000388648	9606.ENSP00000405963	0	0	0	0	0	0.329	0.9	0.078	0.932
CHEK1	MCM10	9606.ENSP00000388648	9606.ENSP00000418268	0	0	0	0	0.794	0	0.9	0.712	0.993
CHEK1	TIMELESS	9606.ENSP00000388648	9606.ENSP00000450607	0	0	0	0	0.338	0.472	0.9	0.872	0.994
CHEK2	MCM4	9606.ENSP00000372023	9606.ENSP00000262105	0	0	0	0	0.202	0.716	0	0.73	0.933
CHEK2	TICRR	9606.ENSP00000372023	9606.ENSP00000268138	0	0	0	0	0.107	0	0	0.895	0.903
CHEK2	FOXM1	9606.ENSP00000372023	9606.ENSP00000342307	0	0	0	0	0.118	0.389	0.9	0.729	0.983
CHEK2	EXO1	9606.ENSP00000372023	9606.ENSP00000355506	0	0	0	0	0.257	0.261	0	0.927	0.956
CHEK2	RASGRF1	9606.ENSP00000372023	9606.ENSP00000405963	0	0	0	0	0.061	0	0.9	0.058	0.903
CHEK2	RAD51	9606.ENSP00000372023	9606.ENSP00000372088	0	0	0	0	0.192	0.682	0	0.894	0.97
CHRDL1	TMEM132A	9606.ENSP00000361112	9606.ENSP00000005286	0	0	0	0	0	0	0.9	0	0.9
CHRDL1	CP	9606.ENSP00000361112	9606.ENSP00000264613	0	0	0	0	0.057	0	0.9	0	0.901
CHRDL1	SPP1	9606.ENSP00000361112	9606.ENSP00000378517	0	0	0	0	0	0	0.9	0	0.9
CHRDL1	CYR61	9606.ENSP00000361112	9606.ENSP00000398736	0	0	0	0	0	0	0.9	0.041	0.9
CHRDL1	GOLM1	9606.ENSP00000361112	9606.ENSP00000373364	0	0	0	0	0	0	0.9	0	0.9
CHRDL1	SERPINA1	9606.ENSP00000361112	9606.ENSP00000416066	0	0	0	0	0.055	0	0.9	0	0.901
CHRDL1	IL6	9606.ENSP00000361112	9606.ENSP00000385675	0	0	0	0	0	0	0.9	0.093	0.905
CKAP2	KIF11	9606.ENSP00000367276	9606.ENSP00000260731	0	0	0	0	0.957	0	0	0.075	0.958
CKAP2	NDC80	9606.ENSP00000367276	9606.ENSP00000261597	0	0	0	0	0.956	0	0	0.138	0.961
CKAP2	KIF15	9606.ENSP00000367276	9606.ENSP00000324020	0	0	0	0	0.896	0	0	0.09	0.902
CKAP2	MKI67	9606.ENSP00000367276	9606.ENSP00000357643	0	0	0	0	0.926	0	0	0.097	0.931
CKAP2	KIF20A	9606.ENSP00000367276	9606.ENSP00000378356	0	0	0	0	0.895	0	0	0.246	0.917
CKAP2	ECT2	9606.ENSP00000367276	9606.ENSP00000376457	0	0	0	0	0.911	0	0	0.15	0.921
CKAP2	NUSAP1	9606.ENSP00000367276	9606.ENSP00000453403	0	0	0	0	0.929	0	0	0.344	0.951
CKAP2L	ECT2	9606.ENSP00000305204	9606.ENSP00000376457	0	0	0	0	0.853	0	0	0.353	0.901
CKS1B	NCAPG	9606.ENSP00000311083	9606.ENSP00000251496	0	0	0	0	0.938	0	0	0.084	0.941
CKS1B	KIF11	9606.ENSP00000311083	9606.ENSP00000260731	0	0	0	0	0.899	0	0	0.185	0.914
CKS1B	PKMYT1	9606.ENSP00000311083	9606.ENSP00000262300	0	0	0	0	0.175	0.846	0	0.482	0.928
CKS1B	CKS2	9606.ENSP00000311083	9606.ENSP00000364976	0	0	0	0.974	0.799	0.825	0.8	0.809	0.992
CKS2	NCAPG	9606.ENSP00000364976	9606.ENSP00000251496	0	0	0	0	0.918	0	0	0.311	0.941
CKS2	PKMYT1	9606.ENSP00000364976	9606.ENSP00000262300	0	0	0	0	0.193	0.841	0	0.463	0.925
CKS2	TYMS	9606.ENSP00000364976	9606.ENSP00000315644	0	0	0	0	0.863	0	0	0.348	0.907
CKS2	UBE2C	9606.ENSP00000364976	9606.ENSP00000348838	0	0	0	0	0.867	0.05	0	0.503	0.931
CKS2	NUSAP1	9606.ENSP00000364976	9606.ENSP00000453403	0	0	0	0	0.844	0	0	0.424	0.906
CLDN1	CLDN18	9606.ENSP00000295522	9606.ENSP00000183605	0	0	0	0.852	0.063	0	0.9	0.534	0.909
CLDN1	CLDN5	9606.ENSP00000295522	9606.ENSP00000385477	0	0	0	0.924	0.063	0	0.9	0.782	0.908
CLDN18	CLDN5	9606.ENSP00000183605	9606.ENSP00000385477	0	0	0	0.755	0.061	0	0.9	0.681	0.918
COL10A1	COL1A1	9606.ENSP00000327368	9606.ENSP00000225964	0	0	0.436	0.752	0.109	0	0.9	0.746	0.931
COL10A1	PLOD2	9606.ENSP00000327368	9606.ENSP00000282903	0	0	0	0	0	0	0.9	0.11	0.907
COL10A1	COL17A1	9606.ENSP00000327368	9606.ENSP00000340937	0	0	0	0.724	0.064	0	0.9	0	0.902
COL10A1	COL13A1	9606.ENSP00000327368	9606.ENSP00000381949	0	0	0.423	0.705	0	0	0.9	0.088	0.913
COL10A1	COL7A1	9606.ENSP00000327368	9606.ENSP00000332371	0	0	0.255	0.75	0.061	0	0.9	0.406	0.916
COL13A1	COL1A1	9606.ENSP00000381949	9606.ENSP00000225964	0	0	0.364	0.724	0.087	0	0.9	0.28	0.919
COL13A1	PLOD2	9606.ENSP00000381949	9606.ENSP00000282903	0	0	0	0	0.069	0.093	0.9	0.151	0.918
COL13A1	COL7A1	9606.ENSP00000381949	9606.ENSP00000332371	0	0	0.232	0.74	0.088	0	0.9	0.258	0.915
COL13A1	COL17A1	9606.ENSP00000381949	9606.ENSP00000340937	0	0	0	0.663	0	0	0.9	0.321	0.909
COL17A1	ITGB4	9606.ENSP00000340937	9606.ENSP00000200181	0	0	0	0	0.17	0.379	0.9	0.643	0.979
COL17A1	COL1A1	9606.ENSP00000340937	9606.ENSP00000225964	0	0	0	0.605	0.082	0	0.9	0.292	0.914
COL17A1	PLOD2	9606.ENSP00000340937	9606.ENSP00000282903	0	0	0	0	0	0.093	0.9	0.043	0.905
COL17A1	COL7A1	9606.ENSP00000340937	9606.ENSP00000332371	0	0	0	0.59	0.088	0	0.9	0.668	0.93
COL1A1	FIGF	9606.ENSP00000225964	9606.ENSP00000297904	0	0	0	0	0	0	0.9	0.111	0.907
COL1A1	COL7A1	9606.ENSP00000225964	9606.ENSP00000332371	0	0	0	0.738	0.14	0.294	0.9	0.555	0.943
COL1A1	PLOD2	9606.ENSP00000225964	9606.ENSP00000282903	0	0	0	0	0.145	0.17	0.9	0.53	0.962
COL7A1	PLOD2	9606.ENSP00000332371	9606.ENSP00000282903	0	0	0	0	0.084	0.17	0.9	0.147	0.926
COL7A1	GRIA1	9606.ENSP00000332371	9606.ENSP00000428994	0	0	0	0	0	0	0.9	0	0.9
COL7A1	SERPINA1	9606.ENSP00000332371	9606.ENSP00000416066	0	0	0	0	0	0.062	0.9	0.041	0.902
CP	TMEM132A	9606.ENSP00000264613	9606.ENSP00000005286	0	0	0	0	0	0	0.9	0.055	0.901
CP	CYR61	9606.ENSP00000264613	9606.ENSP00000398736	0	0	0	0	0	0	0.9	0.041	0.9
CP	GOLM1	9606.ENSP00000264613	9606.ENSP00000373364	0	0	0	0	0	0	0.9	0.189	0.915
CP	SPP1	9606.ENSP00000264613	9606.ENSP00000378517	0	0	0	0	0.088	0	0.9	0.246	0.925
CP	IL6	9606.ENSP00000264613	9606.ENSP00000385675	0	0	0	0	0	0	0.9	0.513	0.949
CP	SERPINA1	9606.ENSP00000264613	9606.ENSP00000416066	0	0	0	0	0.118	0	0.9	0.801	0.981
CSF3	IL6	9606.ENSP00000225474	9606.ENSP00000385675	0	0	0	0	0.296	0	0	0.892	0.921
CTSH	TCN1	9606.ENSP00000220166	9606.ENSP00000257264	0	0	0	0	0	0	0.9	0.069	0.902
CTSH	MMP9	9606.ENSP00000220166	9606.ENSP00000361405	0	0	0	0	0.076	0	0.9	0.207	0.92
CTSH	GGH	9606.ENSP00000220166	9606.ENSP00000260118	0	0	0	0	0	0	0.9	0.243	0.921
CTSV	MMP13	9606.ENSP00000445052	9606.ENSP00000260302	0	0	0	0	0	0	0.9	0.043	0.9
CX3CR1	SSTR1	9606.ENSP00000351059	9606.ENSP00000267377	0	0	0	0.687	0	0	0.9	0	0.9
CX3CR1	CXCL13	9606.ENSP00000351059	9606.ENSP00000286758	0	0	0	0	0	0	0.9	0.424	0.939
CX3CR1	GPER1	9606.ENSP00000351059	9606.ENSP00000380281	0	0	0	0.704	0	0	0.9	0	0.9
CX3CR1	GNG4	9606.ENSP00000351059	9606.ENSP00000375727	0	0	0	0	0	0	0.9	0	0.9
CXCL13	SSTR1	9606.ENSP00000286758	9606.ENSP00000267377	0	0	0	0	0	0	0.9	0	0.9
CXCL13	GPER1	9606.ENSP00000286758	9606.ENSP00000380281	0	0	0	0	0	0	0.9	0	0.9
CXCL13	GNG4	9606.ENSP00000286758	9606.ENSP00000375727	0	0	0	0	0	0	0.9	0	0.9
CYP24A1	CYP27B1	9606.ENSP00000216862	9606.ENSP00000228606	0	0	0.447	0.814	0.061	0	0.9	0.947	0.925
CYR61	TMEM132A	9606.ENSP00000398736	9606.ENSP00000005286	0	0	0	0	0.088	0	0.9	0	0.904
CYR61	GOLM1	9606.ENSP00000398736	9606.ENSP00000373364	0	0	0	0	0.07	0	0.9	0	0.903
CYR61	SPP1	9606.ENSP00000398736	9606.ENSP00000378517	0	0	0	0	0.061	0	0.9	0.328	0.931
CYR61	IL6	9606.ENSP00000398736	9606.ENSP00000385675	0	0	0	0	0.101	0	0.9	0.388	0.94
CYR61	SERPINA1	9606.ENSP00000398736	9606.ENSP00000416066	0	0	0	0	0	0	0.9	0	0.9
DACH1	SIX1	9606.ENSP00000482245	9606.ENSP00000247182	0	0	0	0	0	0.478	0	0.856	0.921
DEFA4	TCN1	9606.ENSP00000297435	9606.ENSP00000257264	0	0	0	0	0.157	0	0.9	0.295	0.935
DEFA4	GGH	9606.ENSP00000297435	9606.ENSP00000260118	0	0	0	0	0	0	0.9	0	0.9
DEPDC1B	RHOJ	9606.ENSP00000265036	9606.ENSP00000316729	0	0	0	0	0	0	0.9	0.137	0.91
DES	TTN	9606.ENSP00000363071	9606.ENSP00000467141	0	0	0	0	0.245	0.068	0.9	0.383	0.95
DLX5	DLX6	9606.ENSP00000222598	9606.ENSP00000428480	0	0	0	0.813	0.193	0	0.9	0.937	0.93
DMBT1	SFTPD	9606.ENSP00000357905	9606.ENSP00000361366	0	0	0	0	0.063	0.379	0.9	0.819	0.988
DNAH9	DNAI2	9606.ENSP00000262442	9606.ENSP00000400252	0	0	0	0	0.091	0.194	0.54	0.757	0.907
DNAH9	DNAI1	9606.ENSP00000262442	9606.ENSP00000480538	0	0	0	0	0.272	0.194	0.54	0.699	0.908
DSC2	DSG3	9606.ENSP00000280904	9606.ENSP00000257189	0	0	0	0.725	0.077	0	0.9	0.829	0.925
DSC2	DSG2	9606.ENSP00000280904	9606.ENSP00000261590	0	0	0	0.717	0.16	0.379	0.9	0.914	0.957
DSC2	PKP1	9606.ENSP00000280904	9606.ENSP00000263946	0	0	0	0	0.063	0.169	0.9	0.853	0.987
DSC2	SPRR2A	9606.ENSP00000280904	9606.ENSP00000376423	0	0	0	0	0	0	0.9	0.046	0.9
DSC2	DSC3	9606.ENSP00000280904	9606.ENSP00000353608	0	0	0	0.972	0.077	0	0.9	0.713	0.905
DSC2	SPRR1B	9606.ENSP00000280904	9606.ENSP00000306461	0	0	0	0	0.084	0	0.9	0.19	0.919
DSC2	PERP	9606.ENSP00000280904	9606.ENSP00000397157	0	0	0	0	0.139	0	0.9	0.43	0.946
DSC2	PKP3	9606.ENSP00000280904	9606.ENSP00000331678	0	0	0	0	0.091	0.429	0.9	0.834	0.99
DSC2	DSP	9606.ENSP00000280904	9606.ENSP00000369129	0	0	0	0	0.173	0.388	0.9	0.912	0.995
DSC3	DSG3	9606.ENSP00000353608	9606.ENSP00000257189	0	0	0	0.714	0.322	0	0.9	0.866	0.946
DSC3	DSG2	9606.ENSP00000353608	9606.ENSP00000261590	0	0	0	0.731	0.097	0	0.9	0.798	0.925
DSC3	PKP1	9606.ENSP00000353608	9606.ENSP00000263946	0	0	0	0	0.103	0.169	0.9	0.866	0.988
DSC3	SPRR1B	9606.ENSP00000353608	9606.ENSP00000306461	0	0	0	0	0.135	0	0.9	0.266	0.93
DSC3	PKP3	9606.ENSP00000353608	9606.ENSP00000331678	0	0	0	0	0.064	0.429	0.9	0.837	0.99
DSC3	SPRR2A	9606.ENSP00000353608	9606.ENSP00000376423	0	0	0	0	0.072	0	0.9	0.046	0.903
DSC3	PERP	9606.ENSP00000353608	9606.ENSP00000397157	0	0	0	0	0.133	0	0.9	0.472	0.95
DSC3	DSP	9606.ENSP00000353608	9606.ENSP00000369129	0	0	0	0	0.156	0.056	0.9	0.871	0.988
DSG2	DSG3	9606.ENSP00000261590	9606.ENSP00000257189	0	0	0	0.87	0.062	0	0.9	0.807	0.912
DSG2	SPRR2A	9606.ENSP00000261590	9606.ENSP00000376423	0	0	0	0	0	0	0.9	0	0.9
DSG2	SPRR1B	9606.ENSP00000261590	9606.ENSP00000306461	0	0	0	0	0.061	0	0.9	0.048	0.902
DSG2	PERP	9606.ENSP00000261590	9606.ENSP00000397157	0	0	0	0	0.227	0	0.9	0.415	0.95
DSG2	PKP1	9606.ENSP00000261590	9606.ENSP00000263946	0	0	0	0	0.064	0.169	0.9	0.855	0.987
DSG2	PKP3	9606.ENSP00000261590	9606.ENSP00000331678	0	0	0	0	0.2	0.429	0.9	0.835	0.991
DSG2	DSP	9606.ENSP00000261590	9606.ENSP00000369129	0	0	0	0	0.326	0.056	0.9	0.925	0.994
DSG3	SPRR2A	9606.ENSP00000257189	9606.ENSP00000376423	0	0	0	0	0.106	0	0.9	0	0.906
DSG3	SPRR1B	9606.ENSP00000257189	9606.ENSP00000306461	0	0	0	0	0.217	0	0.9	0.138	0.926
DSG3	PERP	9606.ENSP00000257189	9606.ENSP00000397157	0	0	0	0	0.062	0	0.9	0.398	0.938
DSG3	PKP1	9606.ENSP00000257189	9606.ENSP00000263946	0	0	0	0	0.121	0.169	0.9	0.873	0.989
DSG3	DSP	9606.ENSP00000257189	9606.ENSP00000369129	0	0	0	0	0.064	0.056	0.9	0.898	0.989
DSG3	PKP3	9606.ENSP00000257189	9606.ENSP00000331678	0	0	0	0	0.062	0.429	0.9	0.838	0.99
DSP	PKP1	9606.ENSP00000369129	9606.ENSP00000263946	0	0	0	0	0.117	0.382	0.9	0.884	0.992
DSP	SPRR1B	9606.ENSP00000369129	9606.ENSP00000306461	0	0	0	0	0.069	0	0.9	0.086	0.907
DSP	PKP3	9606.ENSP00000369129	9606.ENSP00000331678	0	0	0	0	0.364	0.348	0.9	0.848	0.992
DSP	SPRR2A	9606.ENSP00000369129	9606.ENSP00000376423	0	0	0	0	0	0	0.9	0.102	0.906
DSP	PERP	9606.ENSP00000369129	9606.ENSP00000397157	0	0	0	0	0.383	0	0.9	0.479	0.965
DTL	POLE2	9606.ENSP00000355958	9606.ENSP00000216367	0	0	0	0	0.8	0	0.9	0.06	0.979
DTL	GMNN	9606.ENSP00000355958	9606.ENSP00000230056	0	0	0	0	0.723	0	0	0.723	0.92
DTL	NCAPG	9606.ENSP00000355958	9606.ENSP00000251496	0	0	0	0	0.93	0	0	0.081	0.933
DTL	MCM2	9606.ENSP00000355958	9606.ENSP00000265056	0	0	0	0	0.856	0	0	0.392	0.909
DTL	RRM2	9606.ENSP00000355958	9606.ENSP00000353770	0	0	0	0	0.855	0.264	0	0.343	0.924
DTL	EXO1	9606.ENSP00000355958	9606.ENSP00000355506	0	0	0	0	0.937	0	0	0.166	0.945
DTL	MCM10	9606.ENSP00000355958	9606.ENSP00000418268	0	0	0	0	0.854	0	0	0.452	0.917
DTL	RFC4	9606.ENSP00000355958	9606.ENSP00000376272	0	0	0	0	0.799	0.159	0.9	0.089	0.982
DUSP1	ZFP36	9606.ENSP00000239223	9606.ENSP00000469647	0	0	0	0	0.793	0.085	0	0.724	0.943
DUSP1	FOS	9606.ENSP00000239223	9606.ENSP00000306245	0	0	0	0	0.873	0.111	0	0.674	0.96
E2F1	TK1	9606.ENSP00000345571	9606.ENSP00000301634	0	0	0	0	0.543	0.336	0.9	0.345	0.977
E2F1	TYMS	9606.ENSP00000345571	9606.ENSP00000315644	0	0	0	0	0.233	0	0.9	0.446	0.953
E2F1	EZH2	9606.ENSP00000345571	9606.ENSP00000320147	0	0	0	0	0.17	0.081	0.9	0.4	0.948
E2F1	E2F7	9606.ENSP00000345571	9606.ENSP00000323246	0	0	0	0.564	0.229	0.32	0.9	0.561	0.956
E2F1	PMAIP1	9606.ENSP00000345571	9606.ENSP00000326119	0	0	0	0	0.073	0	0.9	0.32	0.931
E2F1	E2F8	9606.ENSP00000345571	9606.ENSP00000481103	0	0	0	0.57	0.197	0.32	0.9	0.559	0.954
E2F1	RAD51	9606.ENSP00000345571	9606.ENSP00000372088	0	0	0	0	0.229	0.263	0.9	0.315	0.955
E2F1	E2F2	9606.ENSP00000345571	9606.ENSP00000355249	0	0	0	0.855	0.107	0.513	0.9	0.792	0.958
E2F1	RRM2	9606.ENSP00000345571	9606.ENSP00000353770	0	0	0	0	0.312	0	0.9	0.655	0.974
E2F2	EZH2	9606.ENSP00000355249	9606.ENSP00000320147	0	0	0	0	0.119	0.065	0.9	0.429	0.946
E2F7	E2F8	9606.ENSP00000323246	9606.ENSP00000481103	0	0	0	0.774	0.231	0.379	0.9	0.883	0.958
E2F8	KIF11	9606.ENSP00000481103	9606.ENSP00000260731	0	0	0	0	0.903	0	0	0.178	0.917
E2F8	KIF15	9606.ENSP00000481103	9606.ENSP00000324020	0	0	0	0	0.877	0	0	0.265	0.906
E2F8	RRM2	9606.ENSP00000481103	9606.ENSP00000353770	0	0	0	0	0.904	0	0	0.339	0.934
ECT2	NCAPG	9606.ENSP00000376457	9606.ENSP00000251496	0	0	0	0	0.883	0	0	0.287	0.913
ECT2	KIF23	9606.ENSP00000376457	9606.ENSP00000260363	0	0	0	0	0.869	0.357	0.9	0.839	0.998
ECT2	KIF11	9606.ENSP00000376457	9606.ENSP00000260731	0	0	0	0	0.921	0.054	0	0.356	0.948
ECT2	NDC80	9606.ENSP00000376457	9606.ENSP00000261597	0	0	0	0	0.902	0	0	0.216	0.92
ECT2	MELK	9606.ENSP00000376457	9606.ENSP00000298048	0	0	0	0	0.924	0.064	0	0.301	0.946
ECT2	RHOJ	9606.ENSP00000376457	9606.ENSP00000316729	0	0	0	0	0	0.128	0.9	0.18	0.922
ECT2	RFC4	9606.ENSP00000376457	9606.ENSP00000376272	0	0	0	0	0.617	0	0	0.77	0.908
ECT2	NUSAP1	9606.ENSP00000376457	9606.ENSP00000453403	0	0	0	0	0.891	0	0	0.278	0.918
ECT2	KIF20A	9606.ENSP00000376457	9606.ENSP00000378356	0	0	0	0	0.866	0.083	0	0.655	0.954
ECT2	PRC1	9606.ENSP00000376457	9606.ENSP00000377793	0	0	0	0	0.916	0	0	0.505	0.957
ECT2	RACGAP1	9606.ENSP00000376457	9606.ENSP00000404190	0	0	0	0	0.868	0.61	0.9	0.9	0.999
EDN1	MMP9	9606.ENSP00000368683	9606.ENSP00000361405	0	0	0	0	0	0	0.8	0.763	0.95
EDN1	EDNRB	9606.ENSP00000368683	9606.ENSP00000366416	0	0	0	0	0	0.951	0.9	0.964	0.999
EDN1	GNG4	9606.ENSP00000368683	9606.ENSP00000375727	0	0	0	0	0	0	0.9	0	0.9
EDNRB	GNG4	9606.ENSP00000366416	9606.ENSP00000375727	0	0	0	0	0.05	0.165	0.9	0.157	0.924
EGR1	IRF6	9606.ENSP00000239938	9606.ENSP00000355988	0	0	0	0	0	0.064	0.9	0.098	0.908
EGR1	FOSB	9606.ENSP00000239938	9606.ENSP00000245919	0	0	0	0	0.754	0.073	0	0.758	0.94
EGR1	EZH2	9606.ENSP00000239938	9606.ENSP00000320147	0	0	0	0	0.051	0.233	0.9	0.377	0.948
EGR1	FOS	9606.ENSP00000239938	9606.ENSP00000306245	0	0	0	0	0.961	0.073	0	0.913	0.996
ERCC6L	ESPL1	9606.ENSP00000334675	9606.ENSP00000257934	0	0	0	0	0.309	0	0.9	0.377	0.953
ERCC6L	NDC80	9606.ENSP00000334675	9606.ENSP00000261597	0.046	0	0	0	0.546	0.056	0.9	0.172	0.96
ERCC6L	KIF18A	9606.ENSP00000334675	9606.ENSP00000263181	0	0	0	0	0.448	0.056	0.9	0.205	0.953
ERCC6L	SGOL1	9606.ENSP00000334675	9606.ENSP00000263753	0	0	0	0	0.34	0.08	0.9	0.371	0.956
ERCC6L	NUF2	9606.ENSP00000334675	9606.ENSP00000271452	0	0	0	0	0.4	0.055	0.9	0.108	0.942
ERCC6L	SPC25	9606.ENSP00000334675	9606.ENSP00000282074	0	0	0	0	0.455	0	0.9	0	0.943
ERCC6L	KNTC1	9606.ENSP00000334675	9606.ENSP00000328236	0	0	0	0	0.332	0	0.9	0	0.93
ERCC6L	SPC24	9606.ENSP00000334675	9606.ENSP00000465075	0	0	0	0	0.288	0	0.9	0.15	0.934
ERCC6L	SGOL2	9606.ENSP00000334675	9606.ENSP00000350447	0	0	0	0	0.218	0	0.9	0.399	0.948
ERCC6L	ZWINT	9606.ENSP00000334675	9606.ENSP00000363055	0	0	0	0	0.338	0	0.9	0.321	0.951
ERCC6L	KIF2C	9606.ENSP00000334675	9606.ENSP00000361298	0	0	0	0	0.574	0.056	0.9	0.137	0.96
ESPL1	NCAPG	9606.ENSP00000257934	9606.ENSP00000251496	0	0	0	0	0.839	0.082	0	0.591	0.934
ESPL1	MKI67	9606.ENSP00000257934	9606.ENSP00000357643	0	0	0	0	0.91	0	0	0.164	0.922
ESPL1	RRM2	9606.ENSP00000257934	9606.ENSP00000353770	0	0	0	0	0.911	0	0	0.256	0.931
ESPL1	SPAG5	9606.ENSP00000257934	9606.ENSP00000323300	0	0	0	0	0.913	0	0	0.293	0.936
ESPL1	NEK2	9606.ENSP00000257934	9606.ENSP00000355966	0	0	0	0	0.876	0	0	0.517	0.937
ESPL1	SPC24	9606.ENSP00000257934	9606.ENSP00000465075	0	0	0	0	0.242	0	0.9	0.253	0.938
ESPL1	KIF20A	9606.ENSP00000257934	9606.ENSP00000378356	0	0	0	0	0.916	0.125	0	0.411	0.952
ESPL1	KIF18A	9606.ENSP00000257934	9606.ENSP00000263181	0	0	0	0	0.399	0.125	0.9	0.259	0.955
ESPL1	SPC25	9606.ENSP00000257934	9606.ENSP00000282074	0	0	0	0	0.553	0	0.9	0.148	0.958
ESPL1	ZWINT	9606.ENSP00000257934	9606.ENSP00000363055	0	0	0	0	0.426	0	0.9	0.389	0.961
ESPL1	KNTC1	9606.ENSP00000257934	9606.ENSP00000328236	0	0	0	0	0.646	0	0.9	0.218	0.969
ESPL1	SGOL2	9606.ENSP00000257934	9606.ENSP00000350447	0	0	0	0	0.188	0	0.9	0.669	0.97
ESPL1	NUF2	9606.ENSP00000257934	9606.ENSP00000271452	0	0	0	0	0.557	0	0.9	0.43	0.972
ESPL1	KIF11	9606.ENSP00000257934	9606.ENSP00000260731	0	0	0	0	0.928	0.266	0	0.733	0.984
ESPL1	SGOL1	9606.ENSP00000257934	9606.ENSP00000263753	0	0	0	0	0.669	0	0.9	0.735	0.99
ESPL1	NDC80	9606.ENSP00000257934	9606.ENSP00000261597	0	0	0	0	0.883	0	0.9	0.672	0.995
ESPL1	UBE2C	9606.ENSP00000257934	9606.ENSP00000348838	0	0	0	0	0.92	0	0.9	0.479	0.995
ESPL1	KIF2C	9606.ENSP00000257934	9606.ENSP00000361298	0	0	0	0	0.914	0.18	0.9	0.472	0.995
EXO1	POLE2	9606.ENSP00000355506	9606.ENSP00000216367	0	0	0	0	0.658	0	0.9	0.395	0.977
EXO1	MCM2	9606.ENSP00000355506	9606.ENSP00000265056	0	0	0	0	0.856	0.053	0	0.388	0.909
EXO1	RRM2	9606.ENSP00000355506	9606.ENSP00000353770	0.052	0	0	0	0.817	0	0	0.467	0.9
EXO1	MCM10	9606.ENSP00000355506	9606.ENSP00000418268	0	0	0	0	0.838	0	0	0.469	0.91
EXO1	RAD54L	9606.ENSP00000355506	9606.ENSP00000361043	0	0	0	0	0.75	0.147	0	0.699	0.93
EXO1	TIMELESS	9606.ENSP00000355506	9606.ENSP00000450607	0	0	0	0	0.383	0.064	0.9	0.4	0.96
EXO1	XRCC3	9606.ENSP00000355506	9606.ENSP00000451974	0.056	0	0	0	0.123	0.193	0.9	0.769	0.981
EXO1	RFC4	9606.ENSP00000355506	9606.ENSP00000376272	0	0	0	0	0.74	0.186	0.9	0.503	0.988
EXO1	RAD51	9606.ENSP00000355506	9606.ENSP00000372088	0.056	0	0	0	0.671	0.385	0.9	0.897	0.997
FABP4	PPARGC1A	9606.ENSP00000256104	9606.ENSP00000264867	0	0	0	0	0	0	0.9	0.549	0.952
FABP4	LPL	9606.ENSP00000256104	9606.ENSP00000309757	0	0	0	0	0.186	0	0.9	0.784	0.98
FAM83D	TPX2	9606.ENSP00000481110	9606.ENSP00000300403	0	0	0	0	0.773	0	0	0.638	0.914
FAM83D	HMMR	9606.ENSP00000481110	9606.ENSP00000377492	0	0	0	0	0.558	0.822	0	0.671	0.971
FANCI	RAD51	9606.ENSP00000310842	9606.ENSP00000372088	0	0	0	0	0.592	0.508	0	0.713	0.937
FANCI	RFC4	9606.ENSP00000310842	9606.ENSP00000376272	0	0	0	0	0.782	0	0.9	0.286	0.983
FANCI	UBE2T	9606.ENSP00000310842	9606.ENSP00000356243	0	0	0	0	0.538	0	0.9	0.82	0.991
FBLN5	MFAP4	9606.ENSP00000345008	9606.ENSP00000378957	0	0	0	0	0.217	0.064	0.9	0.476	0.956
FEN1	POLE2	9606.ENSP00000305480	9606.ENSP00000216367	0	0	0	0	0.705	0	0.9	0.263	0.976
FEN1	RNASEH2A	9606.ENSP00000305480	9606.ENSP00000221486	0.135	0	0	0	0.784	0.266	0	0.714	0.955
FEN1	MCM4	9606.ENSP00000305480	9606.ENSP00000262105	0	0	0	0	0.974	0.053	0	0.419	0.984
FEN1	MCM2	9606.ENSP00000305480	9606.ENSP00000265056	0	0	0	0	0.972	0.053	0	0.609	0.988
FEN1	WDHD1	9606.ENSP00000305480	9606.ENSP00000353793	0	0	0	0	0.655	0.32	0	0.663	0.914
FEN1	RAD51	9606.ENSP00000305480	9606.ENSP00000372088	0.056	0	0	0	0.524	0.264	0	0.852	0.944
FEN1	RFC4	9606.ENSP00000305480	9606.ENSP00000376272	0	0	0	0	0.911	0.186	0.9	0.57	0.996
FIGF	VWF	9606.ENSP00000297904	9606.ENSP00000261405	0	0	0	0	0	0	0.9	0.354	0.932
FIGF	LEFTY2	9606.ENSP00000297904	9606.ENSP00000355785	0	0	0	0	0	0	0.9	0.048	0.9
FIGF	SERPINA1	9606.ENSP00000297904	9606.ENSP00000416066	0	0	0	0	0	0	0.9	0.056	0.901
FIGF	MMRN1	9606.ENSP00000297904	9606.ENSP00000378431	0	0	0	0	0.061	0	0.9	0.069	0.905
FOS	FOSB	9606.ENSP00000306245	9606.ENSP00000245919	0	0	0	0.866	0.899	0.139	0.8	0.947	0.983
FOS	IL6	9606.ENSP00000306245	9606.ENSP00000385675	0	0	0	0	0.088	0	0.9	0.819	0.982
FOXM1	MYBL2	9606.ENSP00000342307	9606.ENSP00000217026	0	0	0	0	0.632	0.204	0.9	0.765	0.992
FOXM1	KIF11	9606.ENSP00000342307	9606.ENSP00000260731	0	0	0	0	0.868	0.051	0	0.285	0.903
FOXM1	MELK	9606.ENSP00000342307	9606.ENSP00000298048	0	0	0	0	0.816	0.112	0	0.789	0.962
FOXM1	TPX2	9606.ENSP00000342307	9606.ENSP00000300403	0	0	0	0	0.903	0	0	0.359	0.935
FOXM1	NUSAP1	9606.ENSP00000342307	9606.ENSP00000453403	0	0	0	0	0.888	0	0	0.298	0.918
FOXM1	KIF2C	9606.ENSP00000342307	9606.ENSP00000361298	0	0	0	0	0.895	0.05	0	0.372	0.932
FOXM1	KIF20A	9606.ENSP00000342307	9606.ENSP00000378356	0	0	0	0	0.844	0.05	0	0.673	0.947
FOXM1	UBE2C	9606.ENSP00000342307	9606.ENSP00000348838	0	0	0	0	0.83	0.085	0	0.697	0.948
FOXM1	MKI67	9606.ENSP00000342307	9606.ENSP00000357643	0	0	0	0	0.937	0	0	0.406	0.961
FUT2	FUT3	9606.ENSP00000387498	9606.ENSP00000305603	0	0	0	0	0.078	0	0.9	0.83	0.983
GGH	GSTM5	9606.ENSP00000260118	9606.ENSP00000256593	0	0	0	0	0.061	0	0.9	0.049	0.902
GGH	TCN1	9606.ENSP00000260118	9606.ENSP00000257264	0	0	0	0	0	0	0.9	0.138	0.91
GGH	MMP9	9606.ENSP00000260118	9606.ENSP00000361405	0	0	0	0	0	0	0.9	0.055	0.901
GINS1	GINS2	9606.ENSP00000262460	9606.ENSP00000253462	0	0	0	0	0.932	0.998	0.9	0.963	0.999
GINS1	MCM4	9606.ENSP00000262460	9606.ENSP00000262105	0	0	0	0	0.706	0.732	0.9	0.645	0.996
GINS1	RFC4	9606.ENSP00000262460	9606.ENSP00000376272	0	0	0	0	0.899	0.129	0	0.08	0.912
GINS1	MCM10	9606.ENSP00000262460	9606.ENSP00000418268	0	0	0	0	0.569	0.304	0	0.747	0.917
GINS1	WDHD1	9606.ENSP00000262460	9606.ENSP00000353793	0	0	0	0	0.676	0.698	0	0.603	0.957
GINS1	MCM2	9606.ENSP00000262460	9606.ENSP00000265056	0	0	0	0	0.489	0.793	0.9	0.842	0.998
GINS1	GINS4	9606.ENSP00000262460	9606.ENSP00000276533	0	0	0	0	0.492	0.996	0.9	0.963	0.999
GINS2	POLE2	9606.ENSP00000253462	9606.ENSP00000216367	0	0	0	0	0.805	0.16	0	0.778	0.96
GINS2	NCAPG	9606.ENSP00000253462	9606.ENSP00000251496	0	0	0	0	0.93	0	0	0.394	0.956
GINS2	WDHD1	9606.ENSP00000253462	9606.ENSP00000353793	0	0	0	0	0.511	0.698	0	0.629	0.94
GINS2	RFC4	9606.ENSP00000253462	9606.ENSP00000376272	0	0	0	0	0.89	0.082	0	0.475	0.942
GINS2	MCM10	9606.ENSP00000253462	9606.ENSP00000418268	0	0	0	0	0.788	0.304	0.54	0.734	0.979
GINS2	MCM2	9606.ENSP00000253462	9606.ENSP00000265056	0	0	0	0	0.928	0.735	0.9	0.664	0.999
GINS2	GINS4	9606.ENSP00000253462	9606.ENSP00000276533	0	0	0	0	0.732	0.996	0.9	0.972	0.999
GINS2	MCM4	9606.ENSP00000253462	9606.ENSP00000262105	0	0	0	0	0.88	0.788	0.9	0.714	0.999
GINS4	MCM4	9606.ENSP00000276533	9606.ENSP00000262105	0	0	0	0	0.494	0.767	0.9	0.832	0.997
GINS4	MCM2	9606.ENSP00000276533	9606.ENSP00000265056	0	0	0	0	0.62	0.767	0.9	0.864	0.998
GINS4	MCM8	9606.ENSP00000276533	9606.ENSP00000368164	0	0	0	0	0.513	0.709	0	0.61	0.94
GINS4	MCM10	9606.ENSP00000276533	9606.ENSP00000418268	0	0	0	0	0.287	0.559	0.54	0.861	0.977
GINS4	WDHD1	9606.ENSP00000276533	9606.ENSP00000353793	0	0	0	0	0.259	0.969	0	0.92	0.998
GMNN	MCM8	9606.ENSP00000230056	9606.ENSP00000368164	0	0	0	0	0.185	0	0.9	0.43	0.949
GMNN	MCM10	9606.ENSP00000230056	9606.ENSP00000418268	0	0	0	0	0.364	0	0.9	0.627	0.974
GMNN	MCM4	9606.ENSP00000230056	9606.ENSP00000262105	0	0	0	0	0.43	0	0.9	0.651	0.978
GMNN	MCM2	9606.ENSP00000230056	9606.ENSP00000265056	0	0	0	0	0.447	0	0.9	0.841	0.99
GNG4	RAMP3	9606.ENSP00000375727	9606.ENSP00000242249	0	0	0	0	0.061	0	0.9	0	0.902
GNG4	RAMP2	9606.ENSP00000375727	9606.ENSP00000253796	0	0	0	0	0.049	0	0.9	0	0.9
GNG4	SSTR1	9606.ENSP00000375727	9606.ENSP00000267377	0	0	0	0	0.063	0.165	0.9	0	0.914
GNG4	VIP	9606.ENSP00000375727	9606.ENSP00000356213	0	0	0	0	0.052	0	0.9	0	0.901
GNG4	GPER1	9606.ENSP00000375727	9606.ENSP00000380281	0	0	0	0	0	0	0.9	0	0.9
GNG4	RXFP1	9606.ENSP00000375727	9606.ENSP00000405841	0	0	0	0	0	0	0.9	0	0.9
GOLM1	TMEM132A	9606.ENSP00000373364	9606.ENSP00000005286	0	0	0	0	0.084	0	0.9	0.569	0.957
GOLM1	IL6	9606.ENSP00000373364	9606.ENSP00000385675	0	0	0	0	0	0	0.9	0.138	0.91
GOLM1	SPP1	9606.ENSP00000373364	9606.ENSP00000378517	0	0	0	0	0	0	0.9	0.292	0.926
GOLM1	SERPINA1	9606.ENSP00000373364	9606.ENSP00000416066	0	0	0	0	0	0	0.9	0.308	0.927
GPER1	SSTR1	9606.ENSP00000380281	9606.ENSP00000267377	0	0	0	0.649	0	0	0.9	0.091	0.901
GRIA1	TSPAN7	9606.ENSP00000428994	9606.ENSP00000367743	0	0	0	0	0.14	0	0.9	0.151	0.92
GRIA1	SERPINA1	9606.ENSP00000428994	9606.ENSP00000416066	0	0	0	0	0	0	0.9	0.146	0.91
GTSE1	KIF2C	9606.ENSP00000415430	9606.ENSP00000361298	0	0	0	0	0.806	0	0	0.653	0.93
HELLS	MCM2	9606.ENSP00000377601	9606.ENSP00000265056	0	0	0	0	0.892	0.157	0	0.261	0.927
HMGA1	LMNB1	9606.ENSP00000399888	9606.ENSP00000261366	0	0	0	0	0.223	0	0.9	0	0.919
HMMR	NCAPG	9606.ENSP00000377492	9606.ENSP00000251496	0	0	0	0	0.929	0	0	0.136	0.936
HMMR	LYVE1	9606.ENSP00000377492	9606.ENSP00000256178	0	0	0	0	0	0	0.9	0.563	0.954
HMMR	PLK4	9606.ENSP00000377492	9606.ENSP00000270861	0	0	0	0	0.803	0	0.9	0.161	0.982
HMMR	TPX2	9606.ENSP00000377492	9606.ENSP00000300403	0	0	0	0	0.837	0.379	0.9	0.751	0.997
HMMR	NEK2	9606.ENSP00000377492	9606.ENSP00000355966	0	0	0	0	0.796	0	0.9	0.296	0.984
HMMR	NUSAP1	9606.ENSP00000377492	9606.ENSP00000453403	0	0	0	0	0.834	0	0	0.554	0.923
HMMR	PBK	9606.ENSP00000377492	9606.ENSP00000428489	0	0	0	0	0.911	0	0	0.311	0.936
HSPA12B	NUP155	9606.ENSP00000254963	9606.ENSP00000231498	0	0	0	0	0	0	0.9	0.136	0.909
HSPA12B	HSPA4L	9606.ENSP00000254963	9606.ENSP00000296464	0	0	0	0	0.215	0	0.9	0.346	0.944
HSPA4L	NUP155	9606.ENSP00000296464	9606.ENSP00000231498	0	0	0	0	0.098	0	0.9	0.058	0.907
IL6	TMEM132A	9606.ENSP00000385675	9606.ENSP00000005286	0	0	0	0	0	0	0.9	0	0.9
IL6	UBE2C	9606.ENSP00000385675	9606.ENSP00000348838	0	0	0	0	0	0	0.9	0.115	0.907
IL6	MMP9	9606.ENSP00000385675	9606.ENSP00000361405	0	0	0	0	0.074	0	0	0.92	0.923
IL6	SPP1	9606.ENSP00000385675	9606.ENSP00000378517	0	0	0	0	0.06	0	0.9	0.793	0.978
IL6	SERPINA1	9606.ENSP00000385675	9606.ENSP00000416066	0	0	0	0	0	0	0.9	0.722	0.971
IL7R	SH3GL3	9606.ENSP00000306157	9606.ENSP00000320092	0	0	0	0	0	0	0.9	0	0.9
ITGA8	ITGB4	9606.ENSP00000367316	9606.ENSP00000200181	0	0	0	0	0.063	0.303	0.8	0.46	0.92
ITGA8	ITGB8	9606.ENSP00000367316	9606.ENSP00000222573	0	0	0	0	0.062	0.303	0.9	0.538	0.965
ITGA8	SPP1	9606.ENSP00000367316	9606.ENSP00000378517	0	0	0	0	0.055	0	0.9	0.187	0.916
ITGA8	NPNT	9606.ENSP00000367316	9606.ENSP00000389252	0	0	0	0	0.062	0.412	0.9	0.98	0.998
ITGB4	SFN	9606.ENSP00000200181	9606.ENSP00000340989	0	0	0	0	0.23	0.068	0.9	0.092	0.926
ITIH3	TIMP3	9606.ENSP00000415769	9606.ENSP00000266085	0	0	0	0	0.061	0	0.9	0	0.902
KCNA5	KCNAB1	9606.ENSP00000252321	9606.ENSP00000419952	0	0	0	0	0.063	0.556	0.9	0.735	0.987
KCNAB1	KCNB1	9606.ENSP00000419952	9606.ENSP00000360806	0	0	0	0	0.089	0.189	0.9	0.671	0.972
KIAA0101	POLE2	9606.ENSP00000300035	9606.ENSP00000216367	0	0	0	0	0.63	0	0.9	0.139	0.965
KIAA0101	KIF11	9606.ENSP00000300035	9606.ENSP00000260731	0	0	0	0	0.935	0	0	0.163	0.943
KIAA0101	NDC80	9606.ENSP00000300035	9606.ENSP00000261597	0	0	0	0	0.918	0	0	0	0.918
KIAA0101	SPAG5	9606.ENSP00000300035	9606.ENSP00000323300	0	0	0	0	0.909	0	0	0	0.909
KIAA0101	NUSAP1	9606.ENSP00000300035	9606.ENSP00000453403	0	0	0	0	0.891	0	0	0.408	0.932
KIAA0101	KIF20A	9606.ENSP00000300035	9606.ENSP00000378356	0	0	0	0	0.919	0	0	0.217	0.934
KIAA0101	RRM2	9606.ENSP00000300035	9606.ENSP00000353770	0	0	0	0	0.918	0	0	0.249	0.936
KIAA0101	UBE2C	9606.ENSP00000300035	9606.ENSP00000348838	0	0	0	0	0.937	0	0	0.172	0.945
KIAA0101	RFC4	9606.ENSP00000300035	9606.ENSP00000376272	0	0	0	0	0.757	0	0.9	0.09	0.975
KIF11	POLE2	9606.ENSP00000260731	9606.ENSP00000216367	0	0	0	0	0.901	0	0	0.203	0.918
KIF11	NCAPG	9606.ENSP00000260731	9606.ENSP00000251496	0	0	0	0	0.985	0.123	0	0.404	0.991
KIF11	KIF23	9606.ENSP00000260731	9606.ENSP00000260363	0	0	0	0.581	0.981	0	0.9	0.8	0.998
KIF11	MCM2	9606.ENSP00000260731	9606.ENSP00000265056	0	0	0	0	0.865	0	0	0.314	0.903
KIF11	SGOL1	9606.ENSP00000260731	9606.ENSP00000263753	0	0	0	0	0.829	0	0	0.488	0.909
KIF11	TYMS	9606.ENSP00000260731	9606.ENSP00000315644	0	0	0	0	0.897	0	0	0.181	0.912
KIF11	KIF26B	9606.ENSP00000260731	9606.ENSP00000385545	0	0	0	0.554	0	0	0.9	0.411	0.917
KIF11	WDHD1	9606.ENSP00000260731	9606.ENSP00000353793	0	0	0	0	0.921	0.064	0	0.054	0.924
KIF11	NCAPD2	9606.ENSP00000260731	9606.ENSP00000325017	0	0	0	0	0.897	0	0	0.332	0.928
KIF11	MELK	9606.ENSP00000260731	9606.ENSP00000298048	0	0	0	0	0.907	0	0	0.378	0.94
KIF11	NCAPG2	9606.ENSP00000260731	9606.ENSP00000387007	0	0	0	0	0.929	0	0	0.275	0.946
KIF11	PLK4	9606.ENSP00000260731	9606.ENSP00000270861	0	0	0	0	0.874	0.185	0	0.548	0.95
KIF11	SPAG5	9606.ENSP00000260731	9606.ENSP00000323300	0	0	0	0	0.92	0	0	0.425	0.952
KIF11	UBE2C	9606.ENSP00000260731	9606.ENSP00000348838	0	0	0	0	0.936	0.084	0	0.356	0.959
KIF11	PBK	9606.ENSP00000260731	9606.ENSP00000428489	0	0	0	0	0.939	0.126	0	0.386	0.964
KIF11	NEK2	9606.ENSP00000260731	9606.ENSP00000355966	0	0	0	0	0.921	0	0	0.584	0.965
KIF11	RRM2	9606.ENSP00000260731	9606.ENSP00000353770	0	0	0	0	0.934	0	0	0.568	0.97
KIF11	MKI67	9606.ENSP00000260731	9606.ENSP00000357643	0	0	0	0	0.959	0	0	0.351	0.972
KIF11	MCM4	9606.ENSP00000260731	9606.ENSP00000262105	0	0	0	0	0.962	0	0	0.3	0.972
KIF11	NUF2	9606.ENSP00000260731	9606.ENSP00000271452	0	0	0	0	0.947	0.151	0	0.735	0.987
KIF11	KIF18A	9606.ENSP00000260731	9606.ENSP00000263181	0	0	0	0.643	0.847	0.169	0.9	0.849	0.99
KIF11	NUSAP1	9606.ENSP00000260731	9606.ENSP00000453403	0	0	0	0	0.986	0	0	0.51	0.992
KIF11	PRC1	9606.ENSP00000260731	9606.ENSP00000377793	0	0	0	0	0.965	0.267	0	0.729	0.992
KIF11	TPX2	9606.ENSP00000260731	9606.ENSP00000300403	0	0	0	0	0.949	0	0	0.872	0.993
KIF11	NDC80	9606.ENSP00000260731	9606.ENSP00000261597	0	0	0	0	0.976	0.18	0	0.754	0.994
KIF11	KIF2C	9606.ENSP00000260731	9606.ENSP00000361298	0	0	0	0.638	0.921	0	0.9	0.82	0.994
KIF11	KIF15	9606.ENSP00000260731	9606.ENSP00000324020	0	0	0	0.634	0.955	0	0.9	0.871	0.996
KIF11	RACGAP1	9606.ENSP00000260731	9606.ENSP00000404190	0	0	0	0	0.933	0.186	0.9	0.468	0.996
KIF11	KIF4A	9606.ENSP00000260731	9606.ENSP00000363524	0	0	0	0.649	0.949	0	0.9	0.783	0.996
KIF11	KIF20A	9606.ENSP00000260731	9606.ENSP00000378356	0	0	0	0.58	0.966	0	0.9	0.715	0.997
KIF14	PRC1	9606.ENSP00000356319	9606.ENSP00000377793	0	0	0	0	0.797	0.185	0.9	0.555	0.991
KIF15	NCAPG	9606.ENSP00000324020	9606.ENSP00000251496	0	0	0	0	0.977	0.064	0	0.41	0.986
KIF15	KIF23	9606.ENSP00000324020	9606.ENSP00000260363	0	0	0	0.599	0.813	0	0.9	0.751	0.986
KIF15	NDC80	9606.ENSP00000324020	9606.ENSP00000261597	0	0	0	0	0.926	0.18	0	0.426	0.962
KIF15	KIF18A	9606.ENSP00000324020	9606.ENSP00000263181	0	0	0	0.64	0.798	0	0.9	0.68	0.984
KIF15	TPX2	9606.ENSP00000324020	9606.ENSP00000300403	0	0	0	0	0.822	0	0.9	0.796	0.996
KIF15	SPAG5	9606.ENSP00000324020	9606.ENSP00000323300	0	0	0	0	0.891	0	0	0.364	0.928
KIF15	RRM2	9606.ENSP00000324020	9606.ENSP00000353770	0	0	0	0	0.889	0	0	0.154	0.902
KIF15	KIF26B	9606.ENSP00000324020	9606.ENSP00000385545	0	0	0	0.552	0	0	0.9	0.163	0.905
KIF15	NUSAP1	9606.ENSP00000324020	9606.ENSP00000453403	0	0	0	0	0.882	0	0	0.473	0.935
KIF15	MKI67	9606.ENSP00000324020	9606.ENSP00000357643	0	0	0	0	0.904	0.379	0	0.279	0.953
KIF15	RACGAP1	9606.ENSP00000324020	9606.ENSP00000404190	0	0	0	0	0.73	0.186	0.9	0.402	0.985
KIF15	KIF4A	9606.ENSP00000324020	9606.ENSP00000363524	0	0	0	0.633	0.864	0	0.9	0.741	0.989
KIF15	KIF2C	9606.ENSP00000324020	9606.ENSP00000361298	0	0	0	0.606	0.891	0	0.9	0.642	0.991
KIF15	KIF20A	9606.ENSP00000324020	9606.ENSP00000378356	0	0	0	0.578	0.915	0	0.9	0.564	0.993
KIF18A	KIF23	9606.ENSP00000263181	9606.ENSP00000260363	0	0	0	0.586	0.75	0	0.9	0.696	0.981
KIF18A	NDC80	9606.ENSP00000263181	9606.ENSP00000261597	0	0	0	0	0.8	0.269	0.9	0.425	0.99
KIF18A	KIF26B	9606.ENSP00000263181	9606.ENSP00000385545	0	0	0	0.574	0	0	0.9	0.194	0.906
KIF18A	SPC24	9606.ENSP00000263181	9606.ENSP00000465075	0	0	0	0	0.237	0	0.9	0.214	0.934
KIF18A	SPC25	9606.ENSP00000263181	9606.ENSP00000282074	0	0	0	0	0.367	0	0.9	0.127	0.939
KIF18A	SGOL2	9606.ENSP00000263181	9606.ENSP00000350447	0	0	0	0	0.401	0	0.9	0.189	0.947
KIF18A	ZWINT	9606.ENSP00000263181	9606.ENSP00000363055	0	0	0	0	0.397	0	0.9	0.239	0.95
KIF18A	KNTC1	9606.ENSP00000263181	9606.ENSP00000328236	0	0	0	0	0.595	0	0.9	0.178	0.963
KIF18A	KIF2C	9606.ENSP00000263181	9606.ENSP00000361298	0	0	0	0.649	0.591	0	0.9	0.729	0.968
KIF18A	SGOL1	9606.ENSP00000263181	9606.ENSP00000263753	0	0	0	0	0.542	0	0.9	0.412	0.97
KIF18A	RACGAP1	9606.ENSP00000263181	9606.ENSP00000404190	0	0	0	0	0.613	0.186	0.9	0.221	0.972
KIF18A	KIF20A	9606.ENSP00000263181	9606.ENSP00000378356	0	0	0	0.565	0.708	0	0.9	0.576	0.977
KIF18A	KIF4A	9606.ENSP00000263181	9606.ENSP00000363524	0	0	0	0.664	0.735	0	0.9	0.75	0.979
KIF18A	NUF2	9606.ENSP00000263181	9606.ENSP00000271452	0	0	0	0	0.796	0.151	0.9	0.569	0.991
KIF20A	NCAPG	9606.ENSP00000378356	9606.ENSP00000251496	0	0	0	0	0.948	0.064	0	0.37	0.966
KIF20A	TROAP	9606.ENSP00000378356	9606.ENSP00000257909	0	0	0	0	0.901	0	0	0.111	0.908
KIF20A	KIF23	9606.ENSP00000378356	9606.ENSP00000260363	0	0	0	0.663	0.876	0	0.9	0.768	0.99
KIF20A	NDC80	9606.ENSP00000378356	9606.ENSP00000261597	0	0	0	0	0.934	0.18	0	0.315	0.959
KIF20A	SGOL1	9606.ENSP00000378356	9606.ENSP00000263753	0	0	0	0	0.871	0	0	0.31	0.907
KIF20A	NUF2	9606.ENSP00000378356	9606.ENSP00000271452	0	0	0	0	0.825	0.151	0	0.539	0.925
KIF20A	MELK	9606.ENSP00000378356	9606.ENSP00000298048	0	0	0	0	0.909	0	0	0.256	0.929
KIF20A	TPX2	9606.ENSP00000378356	9606.ENSP00000300403	0	0	0	0	0.959	0	0	0.459	0.977
KIF20A	SHCBP1	9606.ENSP00000378356	9606.ENSP00000306473	0	0	0	0	0.901	0.16	0	0.092	0.917
KIF20A	SPAG5	9606.ENSP00000378356	9606.ENSP00000323300	0	0	0	0	0.92	0	0	0.253	0.937
KIF20A	UBE2C	9606.ENSP00000378356	9606.ENSP00000348838	0	0	0	0	0.937	0.084	0	0.453	0.965
KIF20A	RRM2	9606.ENSP00000378356	9606.ENSP00000353770	0	0	0	0	0.927	0	0	0.317	0.948
KIF20A	NEK2	9606.ENSP00000378356	9606.ENSP00000355966	0	0	0	0	0.923	0	0	0.484	0.959
KIF20A	MKI67	9606.ENSP00000378356	9606.ENSP00000357643	0	0	0	0	0.91	0	0	0.249	0.929
KIF20A	KIF2C	9606.ENSP00000378356	9606.ENSP00000361298	0	0	0	0.578	0.915	0	0.9	0.609	0.993
KIF20A	KIF4A	9606.ENSP00000378356	9606.ENSP00000363524	0	0	0	0.579	0.936	0.132	0.9	0.784	0.995
KIF20A	PRC1	9606.ENSP00000378356	9606.ENSP00000377793	0	0	0	0	0.892	0.182	0.9	0.468	0.994
KIF20A	KIF26B	9606.ENSP00000378356	9606.ENSP00000385545	0	0	0	0	0	0	0.9	0.348	0.932
KIF20A	PBK	9606.ENSP00000378356	9606.ENSP00000428489	0	0	0	0	0.937	0.126	0	0.356	0.961
KIF20A	NUSAP1	9606.ENSP00000378356	9606.ENSP00000453403	0	0	0	0	0.94	0	0	0.448	0.965
KIF20A	RACGAP1	9606.ENSP00000378356	9606.ENSP00000404190	0	0	0	0	0.878	0.707	0.9	0.793	0.999
KIF23	NCAPG	9606.ENSP00000260363	9606.ENSP00000251496	0	0	0	0	0.891	0.064	0	0.334	0.926
KIF23	MCM4	9606.ENSP00000260363	9606.ENSP00000262105	0	0	0	0	0.893	0	0	0.13	0.903
KIF23	PBK	9606.ENSP00000260363	9606.ENSP00000428489	0	0	0	0	0.902	0.126	0	0.166	0.922
KIF23	KIF26B	9606.ENSP00000260363	9606.ENSP00000385545	0	0	0	0	0	0	0.9	0.287	0.925
KIF23	TPX2	9606.ENSP00000260363	9606.ENSP00000300403	0	0	0	0	0.87	0	0	0.514	0.934
KIF23	SHCBP1	9606.ENSP00000260363	9606.ENSP00000306473	0	0	0	0	0.717	0.793	0	0.347	0.958
KIF23	MELK	9606.ENSP00000260363	9606.ENSP00000298048	0	0	0	0	0.943	0	0	0.319	0.959
KIF23	NUSAP1	9606.ENSP00000260363	9606.ENSP00000453403	0	0	0	0	0.959	0	0	0.298	0.97
KIF23	NDC80	9606.ENSP00000260363	9606.ENSP00000261597	0	0	0	0	0.962	0.18	0	0.151	0.971
KIF23	PRC1	9606.ENSP00000260363	9606.ENSP00000377793	0	0	0	0	0.882	0.472	0	0.682	0.978
KIF23	KIF2C	9606.ENSP00000260363	9606.ENSP00000361298	0	0	0	0.574	0.795	0	0.9	0.673	0.984
KIF23	KIF4A	9606.ENSP00000260363	9606.ENSP00000363524	0	0	0	0.583	0.932	0.132	0.9	0.871	0.995
KIF23	RACGAP1	9606.ENSP00000260363	9606.ENSP00000404190	0	0	0	0	0.949	0.958	0.9	0.951	0.999
KIF26B	KIF2C	9606.ENSP00000385545	9606.ENSP00000361298	0	0	0	0.559	0	0	0.9	0.235	0.908
KIF26B	KIF4A	9606.ENSP00000385545	9606.ENSP00000363524	0	0	0	0.552	0	0	0.9	0.322	0.913
KIF26B	RACGAP1	9606.ENSP00000385545	9606.ENSP00000404190	0	0	0	0	0.075	0.186	0.9	0.058	0.919
KIF2C	NCAPG	9606.ENSP00000361298	9606.ENSP00000251496	0	0	0	0	0.884	0.064	0	0.348	0.923
KIF2C	TROAP	9606.ENSP00000361298	9606.ENSP00000257909	0	0	0	0	0.928	0	0	0.239	0.943
KIF2C	NDC80	9606.ENSP00000361298	9606.ENSP00000261597	0	0	0	0	0.917	0.18	0.9	0.691	0.997
KIF2C	SGOL1	9606.ENSP00000361298	9606.ENSP00000263753	0	0	0	0	0.856	0.128	0.9	0.583	0.994
KIF2C	NUF2	9606.ENSP00000361298	9606.ENSP00000271452	0	0	0	0	0.749	0.151	0.9	0.596	0.99
KIF2C	SPC25	9606.ENSP00000361298	9606.ENSP00000282074	0	0	0	0	0.606	0	0.9	0.281	0.969
KIF2C	MELK	9606.ENSP00000361298	9606.ENSP00000298048	0	0	0	0	0.848	0	0	0.44	0.911
KIF2C	TPX2	9606.ENSP00000361298	9606.ENSP00000300403	0	0	0	0	0.942	0	0	0.632	0.977
KIF2C	SPAG5	9606.ENSP00000361298	9606.ENSP00000323300	0	0	0	0	0.919	0	0	0.473	0.955
KIF2C	KNTC1	9606.ENSP00000361298	9606.ENSP00000328236	0	0	0	0	0.643	0	0.9	0.304	0.972
KIF2C	UBE2C	9606.ENSP00000361298	9606.ENSP00000348838	0	0	0	0	0.919	0.084	0	0.443	0.955
KIF2C	SGOL2	9606.ENSP00000361298	9606.ENSP00000350447	0	0	0	0	0.321	0.328	0.9	0.669	0.982
KIF2C	RRM2	9606.ENSP00000361298	9606.ENSP00000353770	0	0	0	0	0.915	0	0	0.256	0.934
KIF2C	NEK2	9606.ENSP00000361298	9606.ENSP00000355966	0	0	0	0	0.896	0	0	0.51	0.947
KIF2C	MKI67	9606.ENSP00000361298	9606.ENSP00000357643	0	0	0	0	0.904	0	0	0.284	0.928
KIF2C	PRC1	9606.ENSP00000361298	9606.ENSP00000377793	0	0	0	0	0.839	0.182	0	0.318	0.902
KIF2C	PBK	9606.ENSP00000361298	9606.ENSP00000428489	0	0	0	0	0.913	0.126	0	0.27	0.94
KIF2C	NUSAP1	9606.ENSP00000361298	9606.ENSP00000453403	0	0	0	0	0.905	0	0	0.516	0.952
KIF2C	SPC24	9606.ENSP00000361298	9606.ENSP00000465075	0	0	0	0	0.376	0	0.9	0.452	0.962
KIF2C	ZWINT	9606.ENSP00000361298	9606.ENSP00000363055	0	0	0	0	0.767	0	0.9	0.511	0.987
KIF2C	RACGAP1	9606.ENSP00000361298	9606.ENSP00000404190	0	0	0	0	0.794	0.186	0.9	0.471	0.989
KIF2C	KIF4A	9606.ENSP00000361298	9606.ENSP00000363524	0	0	0	0.666	0.889	0	0.9	0.75	0.991
KIF4A	NCAPG	9606.ENSP00000363524	9606.ENSP00000251496	0	0	0	0	0.89	0.064	0	0.51	0.945
KIF4A	NDC80	9606.ENSP00000363524	9606.ENSP00000261597	0	0	0	0	0.895	0.18	0	0.381	0.942
KIF4A	MELK	9606.ENSP00000363524	9606.ENSP00000298048	0	0	0	0	0.926	0	0	0.356	0.95
KIF4A	TPX2	9606.ENSP00000363524	9606.ENSP00000300403	0	0	0	0	0.96	0	0	0.53	0.98
KIF4A	SPAG5	9606.ENSP00000363524	9606.ENSP00000323300	0	0	0	0	0.896	0	0	0.331	0.927
KIF4A	UBE2C	9606.ENSP00000363524	9606.ENSP00000348838	0	0	0	0	0.905	0.084	0	0.38	0.941
KIF4A	NEK2	9606.ENSP00000363524	9606.ENSP00000355966	0	0	0	0	0.9	0	0	0.348	0.932
KIF4A	NUSAP1	9606.ENSP00000363524	9606.ENSP00000453403	0	0	0	0	0.861	0	0	0.535	0.932
KIF4A	PBK	9606.ENSP00000363524	9606.ENSP00000428489	0	0	0	0	0.896	0.126	0	0.318	0.932
KIF4A	PRC1	9606.ENSP00000363524	9606.ENSP00000377793	0	0	0	0	0.937	0.472	0	0.664	0.988
KIF4A	RACGAP1	9606.ENSP00000363524	9606.ENSP00000404190	0	0	0	0	0.909	0.186	0.9	0.617	0.996
KLHL41	ZBTB16	9606.ENSP00000284669	9606.ENSP00000338157	0	0	0	0	0	0.057	0.9	0.041	0.901
KLHL41	UBE2C	9606.ENSP00000284669	9606.ENSP00000348838	0	0	0	0	0.062	0.111	0.9	0	0.909
KNTC1	NDC80	9606.ENSP00000328236	9606.ENSP00000261597	0	0	0	0	0.72	0	0.9	0.536	0.985
KNTC1	SGOL1	9606.ENSP00000328236	9606.ENSP00000263753	0	0	0	0	0.461	0	0.9	0.355	0.962
KNTC1	NUF2	9606.ENSP00000328236	9606.ENSP00000271452	0	0	0	0	0.644	0	0.9	0.457	0.979
KNTC1	SPC25	9606.ENSP00000328236	9606.ENSP00000282074	0	0	0	0	0.684	0	0.9	0.214	0.973
KNTC1	SPC24	9606.ENSP00000328236	9606.ENSP00000465075	0	0	0	0	0.301	0	0.9	0.066	0.929
KNTC1	SGOL2	9606.ENSP00000328236	9606.ENSP00000350447	0	0	0	0	0.458	0	0.9	0.33	0.96
KNTC1	ZWINT	9606.ENSP00000328236	9606.ENSP00000363055	0	0	0	0	0.314	0	0.9	0.542	0.965
KRT13	KRT14	9606.ENSP00000246635	9606.ENSP00000167586	0	0	0	0.963	0.17	0	0.9	0.738	0.915
KRT13	KRT31	9606.ENSP00000246635	9606.ENSP00000251645	0	0	0	0.924	0	0	0.9	0.05	0.9
KRT13	KRT34	9606.ENSP00000246635	9606.ENSP00000377570	0	0	0	0.913	0	0	0.9	0.095	0.9
KRT13	KRT19	9606.ENSP00000246635	9606.ENSP00000355124	0	0	0	0.963	0.158	0	0.9	0.731	0.914
KRT13	KRT77	9606.ENSP00000246635	9606.ENSP00000342710	0	0	0	0.743	0.049	0.185	0.9	0.057	0.916
KRT13	KRT16	9606.ENSP00000246635	9606.ENSP00000301653	0	0	0	0.963	0.214	0	0.9	0.67	0.92
KRT13	KRT80	9606.ENSP00000246635	9606.ENSP00000378292	0	0	0	0.672	0.105	0.236	0.9	0.166	0.928
KRT13	KRT6B	9606.ENSP00000246635	9606.ENSP00000252252	0	0	0	0.761	0.174	0.237	0.9	0.041	0.931
KRT13	KRT5	9606.ENSP00000246635	9606.ENSP00000252242	0	0	0	0.802	0.23	0.185	0.9	0.67	0.94
KRT13	KRT6A	9606.ENSP00000246635	9606.ENSP00000369317	0	0	0	0.763	0.318	0.238	0.9	0.311	0.947
KRT13	KRT15	9606.ENSP00000246635	9606.ENSP00000254043	0	0	0	0.974	0.537	0	0.9	0.803	0.952
KRT14	KRT31	9606.ENSP00000167586	9606.ENSP00000251645	0	0	0	0.936	0	0	0.9	0.354	0.902
KRT14	KRT34	9606.ENSP00000167586	9606.ENSP00000377570	0	0	0	0.927	0.065	0	0.9	0.244	0.904
KRT14	KRT19	9606.ENSP00000167586	9606.ENSP00000355124	0	0	0	0.965	0.1	0	0.9	0.795	0.908
KRT14	KRT77	9606.ENSP00000167586	9606.ENSP00000342710	0	0	0	0.722	0.094	0.185	0.9	0.331	0.926
KRT14	KRT15	9606.ENSP00000167586	9606.ENSP00000254043	0	0	0	0.965	0.352	0	0.9	0.733	0.934
KRT14	KRT80	9606.ENSP00000167586	9606.ENSP00000378292	0	0	0	0.653	0.076	0.235	0.9	0.484	0.935
KRT14	KRT16	9606.ENSP00000167586	9606.ENSP00000301653	0	0	0	0.982	0.682	0	0.9	0.801	0.967
KRT14	KRT6A	9606.ENSP00000167586	9606.ENSP00000369317	0	0	0	0.75	0.539	0.265	0.9	0.735	0.969
KRT14	KRT6B	9606.ENSP00000167586	9606.ENSP00000252252	0	0	0	0.746	0.568	0.265	0.9	0.547	0.97
KRT14	KRT5	9606.ENSP00000167586	9606.ENSP00000252242	0	0	0	0.781	0.742	0.991	0.9	0.95	0.999
KRT15	KRT31	9606.ENSP00000254043	9606.ENSP00000251645	0	0	0	0.93	0	0	0.9	0.422	0.902
KRT15	KRT5	9606.ENSP00000254043	9606.ENSP00000252242	0	0	0	0.784	0.387	0.237	0.9	0.642	0.956
KRT15	KRT6B	9606.ENSP00000254043	9606.ENSP00000252252	0	0	0	0.754	0.243	0.242	0.9	0.436	0.944
KRT15	KRT34	9606.ENSP00000254043	9606.ENSP00000377570	0	0	0	0.92	0.057	0	0.9	0.43	0.904
KRT15	KRT16	9606.ENSP00000254043	9606.ENSP00000301653	0	0	0	0.964	0.183	0	0.9	0.7	0.916
KRT15	KRT19	9606.ENSP00000254043	9606.ENSP00000355124	0	0	0	0.966	0.175	0.109	0.9	0.71	0.922
KRT15	KRT77	9606.ENSP00000254043	9606.ENSP00000342710	0	0	0	0.746	0.062	0.248	0.9	0.407	0.93
KRT15	KRT80	9606.ENSP00000254043	9606.ENSP00000378292	0	0	0	0.657	0.13	0.267	0.9	0.361	0.938
KRT15	KRT6A	9606.ENSP00000254043	9606.ENSP00000369317	0	0	0	0.757	0.175	0.253	0.9	0.55	0.941
KRT16	KRT31	9606.ENSP00000301653	9606.ENSP00000251645	0	0	0	0.934	0	0	0.9	0.346	0.902
KRT16	KRT5	9606.ENSP00000301653	9606.ENSP00000252242	0	0	0	0.78	0.533	0.91	0.9	0.673	0.996
KRT16	KRT6B	9606.ENSP00000301653	9606.ENSP00000252252	0	0	0	0.753	0.685	0.185	0.9	0.747	0.977
KRT16	KRT34	9606.ENSP00000301653	9606.ENSP00000377570	0	0	0	0.922	0.069	0	0.9	0.483	0.906
KRT16	KRT19	9606.ENSP00000301653	9606.ENSP00000355124	0	0	0	0.965	0.141	0	0.9	0.621	0.912
KRT16	KRT77	9606.ENSP00000301653	9606.ENSP00000342710	0	0	0	0.71	0.077	0.185	0.9	0.479	0.929
KRT16	KRT80	9606.ENSP00000301653	9606.ENSP00000378292	0	0	0	0.658	0.181	0.218	0.9	0.387	0.939
KRT16	KRT6A	9606.ENSP00000301653	9606.ENSP00000369317	0	0	0	0.757	0.566	0.227	0.9	0.8	0.97
KRT19	KRT31	9606.ENSP00000355124	9606.ENSP00000251645	0	0	0	0.935	0	0	0.9	0.112	0.9
KRT19	KRT5	9606.ENSP00000355124	9606.ENSP00000252242	0	0	0	0.734	0.084	0.235	0.9	0.747	0.938
KRT19	KRT6B	9606.ENSP00000355124	9606.ENSP00000252252	0	0	0	0.725	0.093	0.311	0.9	0.324	0.937
KRT19	KRT77	9606.ENSP00000355124	9606.ENSP00000342710	0	0	0	0.682	0.147	0.236	0.9	0.094	0.93
KRT19	KRT34	9606.ENSP00000355124	9606.ENSP00000377570	0	0	0	0.934	0	0	0.9	0.385	0.902
KRT19	KRT6A	9606.ENSP00000355124	9606.ENSP00000369317	0	0	0	0.728	0.098	0.218	0.9	0.406	0.931
KRT19	KRT80	9606.ENSP00000355124	9606.ENSP00000378292	0	0	0	0.707	0.219	0.218	0.9	0.072	0.934
KRT31	KRT34	9606.ENSP00000251645	9606.ENSP00000377570	0	0	0	0.98	0.054	0	0.9	0.901	0.903
KRT31	KRT6B	9606.ENSP00000251645	9606.ENSP00000252252	0	0	0	0.691	0	0.078	0.9	0.296	0.911
KRT31	KRT80	9606.ENSP00000251645	9606.ENSP00000378292	0	0	0	0.66	0	0.064	0.9	0.352	0.913
KRT31	KRT6A	9606.ENSP00000251645	9606.ENSP00000369317	0	0	0	0.696	0	0.11	0.9	0.373	0.917
KRT31	KRT5	9606.ENSP00000251645	9606.ENSP00000252242	0	0	0	0.704	0.069	0.134	0.9	0.386	0.921
KRT31	KRT77	9606.ENSP00000251645	9606.ENSP00000342710	0	0	0	0.66	0	0.101	0.9	0.534	0.922
KRT34	KRT5	9606.ENSP00000377570	9606.ENSP00000252242	0	0	0	0.686	0.061	0.185	0.9	0.665	0.933
KRT34	KRT6B	9606.ENSP00000377570	9606.ENSP00000252252	0	0	0	0.676	0.049	0.185	0.9	0.342	0.924
KRT34	KRT77	9606.ENSP00000377570	9606.ENSP00000342710	0	0	0	0.658	0.049	0.185	0.9	0.293	0.923
KRT34	KRT6A	9606.ENSP00000377570	9606.ENSP00000369317	0	0	0	0.681	0.049	0.204	0.9	0.292	0.924
KRT34	KRT80	9606.ENSP00000377570	9606.ENSP00000378292	0	0	0	0.639	0.076	0.204	0.9	0.089	0.921
KRT5	KRT80	9606.ENSP00000252242	9606.ENSP00000378292	0	0	0	0.895	0.061	0	0.9	0.195	0.903
KRT5	KRT77	9606.ENSP00000252242	9606.ENSP00000342710	0	0	0	0.953	0.135	0	0.9	0.32	0.911
KRT5	KRT6A	9606.ENSP00000252242	9606.ENSP00000369317	0	0	0	0.979	0.632	0	0.9	0.659	0.962
KRT5	KRT6B	9606.ENSP00000252242	9606.ENSP00000252252	0	0	0	0.979	0.675	0	0.9	0.527	0.966
KRT6A	KRT6B	9606.ENSP00000369317	9606.ENSP00000252252	0	0	0	0.987	0.805	0	0.9	0.902	0.979
KRT6A	KRT77	9606.ENSP00000369317	9606.ENSP00000342710	0	0	0	0.951	0.136	0	0.9	0.574	0.912
KRT6A	KRT80	9606.ENSP00000369317	9606.ENSP00000378292	0	0	0	0.89	0.088	0	0.9	0.358	0.908
KRT6B	KRT80	9606.ENSP00000252252	9606.ENSP00000378292	0	0	0	0.889	0.077	0	0.9	0.294	0.906
KRT6B	KRT77	9606.ENSP00000252252	9606.ENSP00000342710	0	0	0	0.951	0.135	0	0.9	0.44	0.911
KRT77	KRT80	9606.ENSP00000342710	9606.ENSP00000378292	0	0	0	0.858	0	0	0.9	0.614	0.908
LEFTY2	VWF	9606.ENSP00000355785	9606.ENSP00000261405	0	0	0	0	0	0.086	0.9	0.049	0.905
LEFTY2	SERPINA1	9606.ENSP00000355785	9606.ENSP00000416066	0	0	0	0	0	0	0.9	0	0.9
LEFTY2	MMRN1	9606.ENSP00000355785	9606.ENSP00000378431	0	0	0	0	0	0	0.9	0	0.9
LGR4	RSPO4	9606.ENSP00000368516	9606.ENSP00000217260	0	0	0	0	0	0.477	0.9	0.801	0.988
LGR4	RSPO2	9606.ENSP00000368516	9606.ENSP00000276659	0	0	0	0	0	0.477	0.9	0.811	0.989
LMNB1	ZWINT	9606.ENSP00000261366	9606.ENSP00000363055	0	0	0	0	0.346	0.89	0	0.064	0.926
LPL	PPARGC1A	9606.ENSP00000309757	9606.ENSP00000264867	0	0	0	0	0.075	0	0.9	0.486	0.948
LPL	PPAP2B	9606.ENSP00000309757	9606.ENSP00000360296	0	0	0	0	0	0	0.9	0.049	0.9
LPL	PPAP2C	9606.ENSP00000309757	9606.ENSP00000329697	0	0	0	0	0	0	0.9	0	0.9
LPL	PPAPDC1A	9606.ENSP00000309757	9606.ENSP00000381302	0	0	0	0	0	0	0.9	0	0.9
LRP8	RELN	9606.ENSP00000303634	9606.ENSP00000392423	0	0	0	0	0	0.472	0.9	0.933	0.996
LY6D	LYPD3	9606.ENSP00000301263	9606.ENSP00000244333	0	0	0	0	0.102	0	0.9	0.297	0.931
MCEMP1	STOM	9606.ENSP00000329920	9606.ENSP00000286713	0	0	0	0	0.061	0	0.9	0	0.902
MCEMP1	PLAU	9606.ENSP00000329920	9606.ENSP00000361850	0	0	0	0	0	0	0.9	0	0.9
MCEMP1	PTPRB	9606.ENSP00000329920	9606.ENSP00000334928	0	0	0	0	0	0	0.9	0	0.9
MCM10	POLE2	9606.ENSP00000418268	9606.ENSP00000216367	0	0	0	0	0.791	0.286	0.9	0.651	0.994
MCM10	MCM4	9606.ENSP00000418268	9606.ENSP00000262105	0	0	0	0	0.733	0.802	0.9	0.882	0.999
MCM10	MCM2	9606.ENSP00000418268	9606.ENSP00000265056	0	0	0	0	0.816	0.956	0.9	0.932	0.999
MCM10	TICRR	9606.ENSP00000418268	9606.ENSP00000268138	0	0	0	0	0.565	0	0	0.818	0.917
MCM10	WDHD1	9606.ENSP00000418268	9606.ENSP00000353793	0	0	0	0	0.712	0.261	0	0.938	0.985
MCM10	MCM8	9606.ENSP00000418268	9606.ENSP00000368164	0	0	0	0	0.3	0.571	0.9	0.744	0.991
MCM10	RECQL4	9606.ENSP00000418268	9606.ENSP00000482313	0	0	0	0	0.198	0.126	0	0.875	0.905
MCM2	POLE2	9606.ENSP00000265056	9606.ENSP00000216367	0	0	0	0	0.874	0.172	0.9	0.59	0.995
MCM2	MCM4	9606.ENSP00000265056	9606.ENSP00000262105	0	0	0	0.75	0.999	0.998	0.9	0.921	0.999
MCM2	UHRF1	9606.ENSP00000265056	9606.ENSP00000479617	0	0	0	0	0.894	0	0	0.294	0.922
MCM2	RRM2	9606.ENSP00000265056	9606.ENSP00000353770	0	0	0	0	0.927	0	0	0.38	0.952
MCM2	MCM8	9606.ENSP00000265056	9606.ENSP00000368164	0	0	0	0.688	0.227	0.388	0.9	0.696	0.959
MCM2	TYMS	9606.ENSP00000265056	9606.ENSP00000315644	0	0	0	0	0.98	0	0	0.392	0.987
MCM2	TIMELESS	9606.ENSP00000265056	9606.ENSP00000450607	0	0	0	0	0.874	0.738	0	0.66	0.987
MCM2	WDHD1	9606.ENSP00000265056	9606.ENSP00000353793	0	0	0	0	0.914	0.313	0	0.826	0.988
MCM2	RFC4	9606.ENSP00000265056	9606.ENSP00000376272	0.058	0	0	0	0.927	0.186	0.9	0.584	0.997
MCM4	POLE2	9606.ENSP00000262105	9606.ENSP00000216367	0	0	0	0	0.942	0.172	0.9	0.659	0.998
MCM4	NCAPG	9606.ENSP00000262105	9606.ENSP00000251496	0	0	0	0	0.913	0	0	0.212	0.929
MCM4	NCAPG2	9606.ENSP00000262105	9606.ENSP00000387007	0	0	0	0	0.896	0	0	0.185	0.912
MCM4	PRC1	9606.ENSP00000262105	9606.ENSP00000377793	0	0	0	0	0.924	0	0	0.339	0.947
MCM4	TIMELESS	9606.ENSP00000262105	9606.ENSP00000450607	0	0	0	0	0.857	0.293	0	0.55	0.95
MCM4	RRM2	9606.ENSP00000262105	9606.ENSP00000353770	0	0	0	0	0.932	0	0	0.348	0.954
MCM4	TYMS	9606.ENSP00000262105	9606.ENSP00000315644	0	0	0	0	0.961	0	0	0.475	0.978
MCM4	MCM8	9606.ENSP00000262105	9606.ENSP00000368164	0	0	0	0.686	0.183	0.679	0.9	0.787	0.978
MCM4	WDHD1	9606.ENSP00000262105	9606.ENSP00000353793	0	0	0	0	0.912	0.409	0	0.752	0.986
MCM4	RFC4	9606.ENSP00000262105	9606.ENSP00000376272	0.058	0	0	0	0.963	0.186	0	0.704	0.99
MCM8	POLE2	9606.ENSP00000368164	9606.ENSP00000216367	0	0	0	0	0.447	0.172	0.9	0.292	0.963
MELK	OIP5	9606.ENSP00000298048	9606.ENSP00000220514	0	0	0	0	0.894	0	0	0.163	0.908
MELK	NCAPG	9606.ENSP00000298048	9606.ENSP00000251496	0	0	0	0	0.925	0	0	0.4	0.953
MELK	NDC80	9606.ENSP00000298048	9606.ENSP00000261597	0	0	0	0	0.937	0	0	0.07	0.939
MELK	NUF2	9606.ENSP00000298048	9606.ENSP00000271452	0	0	0	0	0.868	0.077	0	0.354	0.914
MELK	RACGAP1	9606.ENSP00000298048	9606.ENSP00000404190	0	0	0	0	0.88	0	0	0.431	0.929
MELK	NUSAP1	9606.ENSP00000298048	9606.ENSP00000453403	0	0	0	0	0.873	0	0	0.52	0.936
MELK	UBE2C	9606.ENSP00000298048	9606.ENSP00000348838	0	0	0	0	0.89	0.079	0	0.428	0.937
MELK	RRM2	9606.ENSP00000298048	9606.ENSP00000353770	0	0	0	0	0.925	0.131	0	0.438	0.96
MELK	TPX2	9606.ENSP00000298048	9606.ENSP00000300403	0	0	0	0	0.943	0	0	0.422	0.965
MELK	PBK	9606.ENSP00000298048	9606.ENSP00000428489	0	0	0	0	0.951	0.135	0	0.536	0.978
MFAP4	SFTPD	9606.ENSP00000378957	9606.ENSP00000361366	0	0	0	0	0	0.865	0	0.313	0.903
MKI67	NDC80	9606.ENSP00000357643	9606.ENSP00000261597	0	0	0	0	0.883	0	0	0.206	0.903
MKI67	SPAG5	9606.ENSP00000357643	9606.ENSP00000323300	0	0	0	0	0.887	0	0	0.171	0.902
MKI67	UBE2C	9606.ENSP00000357643	9606.ENSP00000348838	0	0	0	0	0.846	0	0	0.454	0.912
MKI67	RRM2	9606.ENSP00000357643	9606.ENSP00000353770	0	0	0	0	0.923	0	0	0.426	0.953
MKI67	NUSAP1	9606.ENSP00000357643	9606.ENSP00000453403	0	0	0	0	0.965	0	0	0.467	0.98
MMP1	MMP13	9606.ENSP00000322788	9606.ENSP00000260302	0	0	0	0.935	0.077	0	0.9	0.863	0.909
MMP1	MMP10	9606.ENSP00000322788	9606.ENSP00000279441	0	0	0.28	0.948	0.361	0	0.9	0.76	0.936
MMP1	MMP3	9606.ENSP00000322788	9606.ENSP00000299855	0	0	0.298	0.953	0.529	0	0.9	0.921	0.953
MMP1	MMP9	9606.ENSP00000322788	9606.ENSP00000361405	0	0	0	0.75	0.518	0	0.9	0.91	0.961
MMP10	MMP13	9606.ENSP00000279441	9606.ENSP00000260302	0	0	0.236	0.941	0.084	0	0.9	0.756	0.909
MMP10	MMP9	9606.ENSP00000279441	9606.ENSP00000361405	0	0	0	0.786	0.53	0.379	0.9	0.83	0.973
MMP10	MMP3	9606.ENSP00000279441	9606.ENSP00000299855	0	0	0.448	0.98	0.311	0.825	0.9	0.805	0.987
MMP13	MMP3	9606.ENSP00000260302	9606.ENSP00000299855	0	0	0.249	0.944	0.085	0	0.9	0.893	0.91
MMP13	MMP9	9606.ENSP00000260302	9606.ENSP00000361405	0	0	0	0.797	0.064	0	0.9	0.878	0.919
MMP3	MMP9	9606.ENSP00000299855	9606.ENSP00000361405	0	0	0	0.791	0.518	0	0.9	0.911	0.959
MMP3	SPP1	9606.ENSP00000299855	9606.ENSP00000378517	0	0	0	0	0.062	0.379	0.9	0.578	0.972
MMP9	TCN1	9606.ENSP00000361405	9606.ENSP00000257264	0	0	0	0	0.104	0	0.9	0.052	0.907
MMP9	TIMP3	9606.ENSP00000361405	9606.ENSP00000266085	0	0	0	0	0	0.457	0.8	0.745	0.969
MMRN1	VWF	9606.ENSP00000378431	9606.ENSP00000261405	0	0	0	0	0.149	0	0.9	0.349	0.939
MMRN1	SERPINA1	9606.ENSP00000378431	9606.ENSP00000416066	0	0	0	0	0	0	0.9	0.071	0.903
MND1	RAD51	9606.ENSP00000240488	9606.ENSP00000372088	0	0	0	0	0.675	0.262	0.9	0.964	0.999
MYBL2	TFAP2A	9606.ENSP00000217026	9606.ENSP00000368924	0	0	0	0	0.089	0	0.9	0.09	0.909
NCAPD2	NCAPG	9606.ENSP00000325017	9606.ENSP00000251496	0	0	0	0	0.994	0.962	0.9	0.885	0.999
NCAPD2	NCAPG2	9606.ENSP00000325017	9606.ENSP00000387007	0	0	0	0	0.736	0	0.36	0.895	0.98
NCAPG	UBE2C	9606.ENSP00000251496	9606.ENSP00000348838	0	0	0	0	0.864	0	0	0.312	0.902
NCAPG	SHCBP1	9606.ENSP00000251496	9606.ENSP00000306473	0	0	0	0	0.936	0	0	0.047	0.937
NCAPG	RRM2	9606.ENSP00000251496	9606.ENSP00000353770	0	0	0	0	0.925	0	0	0.293	0.945
NCAPG	TYMS	9606.ENSP00000251496	9606.ENSP00000315644	0	0	0	0	0.95	0	0	0.194	0.958
NCAPG	PBK	9606.ENSP00000251496	9606.ENSP00000428489	0	0	0	0	0.937	0	0	0.378	0.959
NCAPG	TPX2	9606.ENSP00000251496	9606.ENSP00000300403	0	0	0	0	0.942	0	0	0.389	0.963
NCAPG	NUF2	9606.ENSP00000251496	9606.ENSP00000271452	0	0	0	0	0.953	0	0	0.428	0.972
NCAPG	NCAPG2	9606.ENSP00000251496	9606.ENSP00000387007	0	0	0	0	0.845	0	0.36	0.778	0.976
NCAPG	PRC1	9606.ENSP00000251496	9606.ENSP00000377793	0	0	0	0	0.969	0	0	0.403	0.981
NCAPG	NDC80	9606.ENSP00000251496	9606.ENSP00000261597	0	0	0	0	0.982	0	0	0.279	0.987
NCAPG	NUSAP1	9606.ENSP00000251496	9606.ENSP00000453403	0	0	0	0	0.981	0	0	0.472	0.989
NCAPG2	NDC80	9606.ENSP00000387007	9606.ENSP00000261597	0	0	0	0	0.922	0	0	0.05	0.923
NCAPG2	WDHD1	9606.ENSP00000387007	9606.ENSP00000353793	0	0	0	0	0.905	0	0	0.124	0.913
NDC80	RRM2	9606.ENSP00000261597	9606.ENSP00000353770	0	0	0	0	0.904	0	0	0.199	0.919
NDC80	UBE2C	9606.ENSP00000261597	9606.ENSP00000348838	0	0	0	0	0.885	0.067	0	0.317	0.92
NDC80	RFC4	9606.ENSP00000261597	9606.ENSP00000376272	0	0	0	0	0.883	0	0	0.362	0.922
NDC80	WDHD1	9606.ENSP00000261597	9606.ENSP00000353793	0	0	0	0	0.926	0	0	0	0.926
NDC80	TYMS	9606.ENSP00000261597	9606.ENSP00000315644	0	0	0	0	0.921	0	0	0.232	0.937
NDC80	SPAG5	9606.ENSP00000261597	9606.ENSP00000323300	0	0	0	0	0.908	0	0	0.348	0.937
NDC80	PRC1	9606.ENSP00000261597	9606.ENSP00000377793	0	0	0	0	0.934	0	0	0.19	0.944
NDC80	TPX2	9606.ENSP00000261597	9606.ENSP00000300403	0	0	0	0	0.927	0	0	0.429	0.956
NDC80	PBK	9606.ENSP00000261597	9606.ENSP00000428489	0	0	0	0	0.956	0	0	0.122	0.96
NDC80	SGOL2	9606.ENSP00000261597	9606.ENSP00000350447	0	0	0	0	0.519	0	0.9	0.267	0.961
NDC80	NUSAP1	9606.ENSP00000261597	9606.ENSP00000453403	0	0	0	0	0.981	0	0	0.245	0.985
NDC80	SGOL1	9606.ENSP00000261597	9606.ENSP00000263753	0	0	0	0	0.855	0	0.9	0.57	0.993
NDC80	NEK2	9606.ENSP00000261597	9606.ENSP00000355966	0	0	0	0	0.955	0.379	0	0.827	0.994
NDC80	SPC25	9606.ENSP00000261597	9606.ENSP00000282074	0	0	0	0	0.78	0.988	0.9	0.979	0.999
NDC80	ZWINT	9606.ENSP00000261597	9606.ENSP00000363055	0	0	0	0	0.771	0.929	0.9	0.67	0.999
NDC80	NUF2	9606.ENSP00000261597	9606.ENSP00000271452	0	0	0	0	0.957	0.997	0.9	0.95	0.999
NDC80	SPC24	9606.ENSP00000261597	9606.ENSP00000465075	0	0	0	0	0.583	0.945	0.9	0.827	0.999
NEK2	SGOL1	9606.ENSP00000355966	9606.ENSP00000263753	0	0	0	0	0.861	0	0	0.44	0.918
NEK2	PLK4	9606.ENSP00000355966	9606.ENSP00000270861	0	0	0	0.657	0.591	0	0.9	0.53	0.964
NEK2	TPX2	9606.ENSP00000355966	9606.ENSP00000300403	0	0	0	0	0.868	0	0.9	0.543	0.993
NEK2	SPAG5	9606.ENSP00000355966	9606.ENSP00000323300	0	0	0	0	0.903	0	0	0.278	0.927
NEK2	UBE2C	9606.ENSP00000355966	9606.ENSP00000348838	0	0	0	0	0.825	0	0.9	0.51	0.99
NEK2	RRM2	9606.ENSP00000355966	9606.ENSP00000353770	0	0	0	0	0.882	0	0	0.375	0.923
NEK2	PBK	9606.ENSP00000355966	9606.ENSP00000428489	0	0	0	0.575	0.886	0.084	0	0.487	0.913
NEK2	NUSAP1	9606.ENSP00000355966	9606.ENSP00000453403	0	0	0	0	0.922	0	0	0.322	0.944
NGEF	RHOJ	9606.ENSP00000264051	9606.ENSP00000316729	0	0	0	0	0.049	0.185	0.9	0.317	0.94
NUF2	SGOL1	9606.ENSP00000271452	9606.ENSP00000263753	0	0	0	0	0.685	0	0.9	0.452	0.981
NUF2	TPX2	9606.ENSP00000271452	9606.ENSP00000300403	0	0	0	0	0.899	0	0	0.511	0.949
NUF2	PBK	9606.ENSP00000271452	9606.ENSP00000428489	0	0	0	0	0.919	0	0	0.401	0.949
NUF2	NUSAP1	9606.ENSP00000271452	9606.ENSP00000453403	0	0	0	0	0.94	0	0	0.378	0.961
NUF2	SGOL2	9606.ENSP00000271452	9606.ENSP00000350447	0	0	0	0	0.596	0	0.9	0.213	0.965
NUF2	ZWINT	9606.ENSP00000271452	9606.ENSP00000363055	0	0	0	0	0.559	0.929	0.9	0.641	0.998
NUF2	SPC25	9606.ENSP00000271452	9606.ENSP00000282074	0	0	0	0	0.833	0.987	0.9	0.961	0.999
NUF2	SPC24	9606.ENSP00000271452	9606.ENSP00000465075	0	0	0	0	0.378	0.945	0.9	0.933	0.999
NUSAP1	OIP5	9606.ENSP00000453403	9606.ENSP00000220514	0	0	0	0	0.871	0	0	0.708	0.961
NUSAP1	TPX2	9606.ENSP00000453403	9606.ENSP00000300403	0	0	0	0	0.913	0	0	0.647	0.968
NUSAP1	SPAG5	9606.ENSP00000453403	9606.ENSP00000323300	0	0	0	0	0.902	0	0	0.426	0.941
NUSAP1	UBE2C	9606.ENSP00000453403	9606.ENSP00000348838	0	0	0	0	0.935	0	0	0.557	0.97
NUSAP1	RRM2	9606.ENSP00000453403	9606.ENSP00000353770	0	0	0	0	0.924	0	0	0.53	0.962
NUSAP1	PRC1	9606.ENSP00000453403	9606.ENSP00000377793	0	0	0	0	0.962	0	0	0.433	0.977
NUSAP1	PBK	9606.ENSP00000453403	9606.ENSP00000428489	0	0	0	0	0.937	0	0	0.441	0.963
OGN	PRELP	9606.ENSP00000262551	9606.ENSP00000343924	0	0	0	0.626	0.12	0	0.9	0.806	0.935
OIP5	PBK	9606.ENSP00000220514	9606.ENSP00000428489	0	0	0	0	0.891	0	0	0.199	0.909
OIP5	PRC1	9606.ENSP00000220514	9606.ENSP00000377793	0	0	0	0	0.833	0	0	0.502	0.913
OIP5	TPX2	9606.ENSP00000220514	9606.ENSP00000300403	0	0	0	0	0.839	0	0	0.549	0.924
PAFAH1B3	RELN	9606.ENSP00000444935	9606.ENSP00000392423	0	0	0	0	0.049	0	0.9	0.386	0.936
PBK	TPX2	9606.ENSP00000428489	9606.ENSP00000300403	0	0	0	0	0.927	0.063	0	0.354	0.952
PBK	SPAG5	9606.ENSP00000428489	9606.ENSP00000323300	0	0	0	0	0.913	0	0	0.184	0.926
PBK	UBE2C	9606.ENSP00000428489	9606.ENSP00000348838	0	0	0	0	0.938	0.183	0	0.258	0.959
PBK	RRM2	9606.ENSP00000428489	9606.ENSP00000353770	0	0	0	0	0.936	0	0	0.311	0.954
PBK	RACGAP1	9606.ENSP00000428489	9606.ENSP00000404190	0	0	0	0	0.898	0.064	0	0.188	0.916
PECAM1	VWF	9606.ENSP00000457421	9606.ENSP00000261405	0	0	0	0	0.175	0	0	0.887	0.903
PERP	PKP1	9606.ENSP00000397157	9606.ENSP00000263946	0	0	0	0	0.11	0	0.9	0.486	0.95
PERP	TP63	9606.ENSP00000397157	9606.ENSP00000264731	0	0	0	0	0.062	0	0.9	0.776	0.977
PERP	PKP3	9606.ENSP00000397157	9606.ENSP00000331678	0	0	0	0	0.314	0	0.9	0.484	0.961
PIF1	RAD51	9606.ENSP00000328174	9606.ENSP00000372088	0.042	0	0	0	0.199	0.374	0	0.83	0.907
PIF1	TIMELESS	9606.ENSP00000328174	9606.ENSP00000450607	0	0	0	0	0.27	0.73	0	0.636	0.922
PITX1	TBX4	9606.ENSP00000265340	9606.ENSP00000240335	0	0	0	0	0	0.051	0	0.905	0.906
PITX2	TFAP2A	9606.ENSP00000304169	9606.ENSP00000368924	0	0	0	0	0.117	0.064	0.9	0.408	0.944
PKP1	SPRR2A	9606.ENSP00000263946	9606.ENSP00000376423	0	0	0	0	0.098	0	0.9	0.058	0.907
PKP1	SPRR1B	9606.ENSP00000263946	9606.ENSP00000306461	0	0	0	0	0.218	0	0.9	0.111	0.924
PKP1	PKP3	9606.ENSP00000263946	9606.ENSP00000331678	0	0	0	0.701	0.243	0	0.9	0.838	0.94
PKP3	SPRR1B	9606.ENSP00000331678	9606.ENSP00000306461	0	0	0	0	0.104	0	0.9	0	0.906
PKP3	SPRR2A	9606.ENSP00000331678	9606.ENSP00000376423	0	0	0	0	0.06	0	0.9	0.067	0.904
PLAU	STOM	9606.ENSP00000361850	9606.ENSP00000286713	0	0	0	0	0.061	0	0.9	0.041	0.902
PLAU	PTPRB	9606.ENSP00000361850	9606.ENSP00000334928	0	0	0	0	0	0	0.9	0	0.9
PLK4	TPX2	9606.ENSP00000270861	9606.ENSP00000300403	0	0	0	0	0.771	0	0.9	0.305	0.982
PLXNB3	SEMA3G	9606.ENSP00000442736	9606.ENSP00000231721	0	0	0	0	0.088	0.188	0	0.897	0.918
POLE2	XRCC3	9606.ENSP00000216367	9606.ENSP00000451974	0	0	0	0	0.087	0	0.9	0.158	0.916
POLE2	RAD51	9606.ENSP00000216367	9606.ENSP00000372088	0	0	0	0	0.382	0	0.9	0.319	0.954
POLE2	WDHD1	9606.ENSP00000216367	9606.ENSP00000353793	0	0	0	0	0.929	0.163	0	0.51	0.968
POLE2	RFC4	9606.ENSP00000216367	9606.ENSP00000376272	0	0	0	0	0.812	0	0.9	0.556	0.99
PPARGC1A	TWIST1	9606.ENSP00000264867	9606.ENSP00000242261	0	0	0	0	0	0	0.9	0.837	0.983
PRC1	TPX2	9606.ENSP00000377793	9606.ENSP00000300403	0	0	0	0	0.966	0	0	0.577	0.985
PRC1	UBE2C	9606.ENSP00000377793	9606.ENSP00000348838	0	0	0	0	0.899	0	0	0.235	0.919
PRC1	RACGAP1	9606.ENSP00000377793	9606.ENSP00000404190	0	0	0	0	0.954	0.379	0	0.436	0.982
PTPRB	STOM	9606.ENSP00000334928	9606.ENSP00000286713	0	0	0	0	0.061	0.05	0.9	0	0.903
RACGAP1	TPX2	9606.ENSP00000404190	9606.ENSP00000300403	0	0	0	0	0.867	0	0	0.354	0.91
RACGAP1	SHCBP1	9606.ENSP00000404190	9606.ENSP00000306473	0	0	0	0	0.657	0.59	0	0.462	0.917
RACGAP1	RHOJ	9606.ENSP00000404190	9606.ENSP00000316729	0	0	0	0	0	0.081	0.9	0.334	0.933
RAD51	TRIP13	9606.ENSP00000372088	9606.ENSP00000166345	0	0	0	0	0.69	0.266	0	0.651	0.913
RAD51	RAD54B	9606.ENSP00000372088	9606.ENSP00000336606	0	0	0	0	0.222	0.826	0	0.909	0.986
RAD51	RAD54L	9606.ENSP00000372088	9606.ENSP00000361043	0	0	0	0	0.585	0.826	0	0.785	0.983
RAD51	RFC4	9606.ENSP00000372088	9606.ENSP00000376272	0	0	0	0	0.471	0.185	0.9	0.311	0.966
RAD51	XRCC3	9606.ENSP00000372088	9606.ENSP00000451974	0	0	0.279	0.595	0.063	0.825	0.9	0.983	0.99
RAMP2	RAMP3	9606.ENSP00000253796	9606.ENSP00000242249	0	0	0	0.78	0.175	0	0.9	0.926	0.931
RAMP2	RXFP1	9606.ENSP00000253796	9606.ENSP00000405841	0	0	0	0	0	0	0.9	0.049	0.9
RAMP2	VIP	9606.ENSP00000253796	9606.ENSP00000356213	0	0	0	0	0.069	0	0.9	0.267	0.925
RAMP3	RXFP1	9606.ENSP00000242249	9606.ENSP00000405841	0	0	0	0	0	0	0.9	0.207	0.917
RAMP3	VIP	9606.ENSP00000242249	9606.ENSP00000356213	0	0	0	0	0.098	0	0.9	0.19	0.92
RFC4	TYMS	9606.ENSP00000376272	9606.ENSP00000315644	0	0	0	0	0.898	0	0	0.35	0.931
RFC4	RRM2	9606.ENSP00000376272	9606.ENSP00000353770	0	0	0	0	0.873	0.057	0	0.467	0.931
RFC4	UBE2T	9606.ENSP00000376272	9606.ENSP00000356243	0	0	0	0	0.707	0.084	0.9	0.094	0.972
RFC4	XRCC3	9606.ENSP00000376272	9606.ENSP00000451974	0	0	0	0	0.11	0.185	0.9	0.113	0.927
RFC4	TIMELESS	9606.ENSP00000376272	9606.ENSP00000450607	0	0	0	0	0.556	0.167	0.9	0.281	0.969
RHOJ	STARD8	9606.ENSP00000316729	9606.ENSP00000363727	0	0	0	0	0.055	0.088	0.9	0.081	0.91
RHOJ	STARD13	9606.ENSP00000316729	9606.ENSP00000338785	0	0	0	0	0.084	0.088	0.9	0.245	0.928
RNASEH2A	TYMS	9606.ENSP00000221486	9606.ENSP00000315644	0.275	0	0	0	0.877	0	0	0.149	0.918
ROBO4	SLIT2	9606.ENSP00000304945	9606.ENSP00000422591	0	0	0	0	0.079	0.576	0	0.884	0.951
RRM2	TPX2	9606.ENSP00000353770	9606.ENSP00000300403	0	0	0	0	0.923	0	0	0.265	0.941
RRM2	TYMS	9606.ENSP00000353770	9606.ENSP00000315644	0	0	0	0	0.923	0.05	0	0.618	0.97
RRM2	SPAG5	9606.ENSP00000353770	9606.ENSP00000323300	0	0	0	0	0.915	0	0	0	0.915
RRM2	UBE2C	9606.ENSP00000353770	9606.ENSP00000348838	0	0	0	0	0.92	0.064	0	0.474	0.957
RSPO2	RSPO4	9606.ENSP00000276659	9606.ENSP00000217260	0	0	0	0.906	0	0	0.9	0.834	0.907
RXFP1	VIP	9606.ENSP00000405841	9606.ENSP00000356213	0	0	0	0	0.098	0	0.9	0.114	0.913
SELP	VWF	9606.ENSP00000263686	9606.ENSP00000261405	0	0	0	0	0.191	0	0	0.916	0.93
SERPINA1	TMEM132A	9606.ENSP00000416066	9606.ENSP00000005286	0	0	0	0	0	0	0.9	0.073	0.903
SERPINA1	VWF	9606.ENSP00000416066	9606.ENSP00000261405	0	0	0	0	0	0	0.9	0.399	0.937
SERPINA1	SPP1	9606.ENSP00000416066	9606.ENSP00000378517	0	0	0	0	0.076	0	0.9	0.203	0.92
SFN	TP63	9606.ENSP00000340989	9606.ENSP00000264731	0	0	0	0	0.073	0.379	0.9	0.283	0.953
SGCA	SGCG	9606.ENSP00000262018	9606.ENSP00000218867	0	0	0	0	0.149	0.081	0.54	0.874	0.948
SGOL1	ZWINT	9606.ENSP00000263753	9606.ENSP00000363055	0	0	0	0	0.063	0	0.9	0.297	0.928
SGOL1	SPC24	9606.ENSP00000263753	9606.ENSP00000465075	0	0	0	0	0.27	0	0.9	0.266	0.941
SGOL1	SPC25	9606.ENSP00000263753	9606.ENSP00000282074	0	0	0	0	0.471	0	0.9	0.153	0.951
SGOL1	SGOL2	9606.ENSP00000263753	9606.ENSP00000350447	0	0	0	0	0.393	0	0.9	0.752	0.983
SGOL2	SPC25	9606.ENSP00000350447	9606.ENSP00000282074	0	0	0	0	0.336	0	0.9	0.243	0.945
SGOL2	SPC24	9606.ENSP00000350447	9606.ENSP00000465075	0	0	0	0	0.144	0	0.9	0.047	0.911
SGOL2	ZWINT	9606.ENSP00000350447	9606.ENSP00000363055	0	0	0	0	0.187	0	0.9	0.315	0.939
SHMT2	TYMS	9606.ENSP00000333667	9606.ENSP00000315644	0.174	0	0	0	0.2	0	0.9	0.812	0.985
SPAG5	TROAP	9606.ENSP00000323300	9606.ENSP00000257909	0	0	0	0	0.894	0	0	0.388	0.932
SPAG5	TPX2	9606.ENSP00000323300	9606.ENSP00000300403	0	0	0	0	0.878	0	0	0.267	0.906
SPAG5	UBE2C	9606.ENSP00000323300	9606.ENSP00000348838	0	0	0	0	0.924	0	0	0.215	0.938
SPC24	SPC25	9606.ENSP00000465075	9606.ENSP00000282074	0	0	0	0	0.435	0.945	0.9	0.922	0.999
SPC24	ZWINT	9606.ENSP00000465075	9606.ENSP00000363055	0	0	0	0	0.17	0.929	0.9	0.67	0.997
SPC25	ZWINT	9606.ENSP00000282074	9606.ENSP00000363055	0	0	0	0	0.559	0.929	0.9	0.168	0.997
SPP1	TMEM132A	9606.ENSP00000378517	9606.ENSP00000005286	0	0	0	0	0	0	0.9	0.041	0.9
SPRR1B	SPRR2A	9606.ENSP00000306461	9606.ENSP00000376423	0	0	0	0	0.533	0	0.9	0.584	0.978
THBS2	THSD1	9606.ENSP00000355751	9606.ENSP00000258613	0	0	0	0	0	0	0.9	0.177	0.914
TIMELESS	WDHD1	9606.ENSP00000450607	9606.ENSP00000353793	0	0	0	0	0.7	0.266	0	0.87	0.969
TK1	TYMS	9606.ENSP00000301634	9606.ENSP00000315644	0.169	0	0	0	0.787	0	0.9	0.856	0.997
TPX2	UBE2C	9606.ENSP00000300403	9606.ENSP00000348838	0	0	0	0	0.95	0	0	0.554	0.976
TYMS	UBE2C	9606.ENSP00000315644	9606.ENSP00000348838	0	0	0	0	0.796	0.819	0	0.307	0.972
UBE2C	ZBTB16	9606.ENSP00000348838	9606.ENSP00000338157	0	0	0	0	0	0.085	0.9	0.191	0.919
UBE2C	UBE2T	9606.ENSP00000348838	9606.ENSP00000356243	0	0	0	0.815	0.733	0.168	0.9	0.629	0.978
